# Supplementary material
Source: publisher figshare collection journal article supplement (https://acs.figshare.com/ndownloader/files/24974811)
Supplement: Supplementary file 1 [file 24974811]

# Markovnikov Selective Hydroboration of Olefins Catalyzed by a Copper N-Heterocyclic Carbene Complex

Tarah A. DiBenedetto, Astrid M. Parsons, William D. Jones\*

Department of Chemistry, University of Rochester, Rochester, NY 14627

jones@chem.rochester.edu

*Supporting Information*

## Table of Contents

|                                                  |      |
|--------------------------------------------------|------|
| 1. General information                           | S-2  |
| 2. Optimization of hydroboration reaction workup | S-4  |
| 3. Optimization of electron rich substrates      | S-5  |
| 4. General procedure for stoichiometric studies  | S-7  |
| 5. Product characterization                      | S-11 |
| 6. Large scale reaction                          | S-17 |
| 7. Unsuccessful Substrates                       | S-19 |
| 8. GC-MS Data                                    | S-20 |
| 9. NMR Data (NEW)                                | S-58 |
| 10. References                                   | S-80 |

## 1. General information

### 1.1 Reagents

#### Metal Complexes

Unless otherwise noted, all organometallic compounds were prepared and handled under a nitrogen atmosphere using standard Schlenk and glovebox techniques.

#### Ligands

(*1E, 2E*)-*N*<sup>1</sup>, *N*<sup>2</sup>-bis(2,6-diisopropylphenyl)ethane-1,2-diimine **A** was synthesized according to the literature procedure.<sup>1</sup> 1,3-Bis(2,6-diisopropylphenyl)-1,3-dihydro-2*H*-imidazol-2-ylidene **B** was synthesized according to the literature procedure.<sup>2</sup>

#### Solvents

Anhydrous tetrahydrofuran (THF) was obtained from an Innovative Technology PS-MD-6 solvent purification system and this was degassed by three freeze-pump-thaw cycles and stored in a nitrogen glovebox. THF-*d*<sub>8</sub> and chloroform-*d* (CDCl<sub>3</sub>) were purchased from Cambridge Isotopes. CDCl<sub>3</sub> was used without further purification. THF-*d*<sub>8</sub> was degassed by three freeze-pump-thaw cycles and stored over activated 3 Å molecular sieves inside a nitrogen glovebox. Solvents for the preparation of the *N*-heterocyclic carbene salt and the copper precursor were obtained from Fisher Scientific and used without further purification.

#### Other reagents

Reagents were used as received from the following sources: 2,4,6-trimethylbenzaldehyde (Combi Blocks), α,α,α-trifluorotoluene (Sigma Aldrich), 4-fluorobenzoic acid (Sigma Aldrich), 4,4,5,5-tetramethyl-1,3,2-dioxaborolane (Sigma Aldrich), bis(pinacolato)diboron (Combi Blocks), styrene (Sigma Aldrich), 4-cyanostyrene (Alfa Aesar), 4-methylstyrene (Sigma Aldrich), 4-trifluoromethylstyrene (Combi Blocks), 4-ethoxystyrene (Combi Blocks), 4-methoxystyrene (Sigma Aldrich), 4-aminostyrene (Combi Blocks), 4-fluorostyrene (Combi Blocks), 2-(4-ethenylphenyl)-4,4,5,5-tetramethyl-1,3,2-dioxaborolane (Combi Blocks), 3-methylstyrene (Sigma Aldrich), 3-chlorostyrene (Combi Blocks), 2-methylstyrene (Fluka), 2-chlorostyrene (Combi Blocks), α-methylstyrene (Sigma Aldrich), ethynylbenzene (Sigma Aldrich), 1-ethynyl-2-methylbenzene (Combi Blocks), 3-ethynylpyridine (Combi Blocks), 1-ethynyl-4-methoxybenzene (Sigma Aldrich), methyl 4-ethynylbenzoate (Combi Blocks), 1,2-dihydronaphthalene (Sigma Aldrich), ethyl acrylate (Sigma Aldrich), 4-vinylpyridine (Sigma Aldrich), triisopropyl(prop-1-yn-1-yl)silane (Sigma Aldrich), 1-ethynylcyclohex-1-ene (Sigma Aldrich), 4-bromostyrene (Combi Blocks), 1-ethynyl-4-(trifluoromethyl)benzene (Sigma Aldrich), 1-ethynyl-4-methylbenzene (Sigma Aldrich), 1-chloro-3-ethynylbenzene (Sigma Aldrich), 2,6-diisopropylaniline (TCI), glyoxal (Alfa Aesar), formic acid (Fisher Scientific), paraformaldehyde (Sigma Aldrich), hydrogen chloride 4M in dioxane (Oakwood), copper(I) oxide (Fisher Scientific), cesium hydroxide monohydrate (Sigma Aldrich)

## 1.2 Methods

### NMR spectroscopy

<sup>1</sup>H NMR spectra were recorded on 400 and 500 MHz Bruker Avance NMR instruments. NMR chemical shifts are reported in ppm and are referenced to the residual solvent peak CDCl<sub>3</sub> ( $\delta$  = 7.26) and THF-*d*<sub>8</sub> ( $\delta$  = 3.58). Coupling constants (*J*) are reported in Hertz.

### GC-MS analysis

GC-MS spectra were recorded on a Shimadzu QP2010 instrument equipped with a SH-Rxi-5ms column (15 M  $\times$  0.25 mm ID  $\times$  0.25  $\mu$  film). Column flow = 0.7 mL/min, temperature program: 3 min at 50 °C, then increase at 20 °C/min to 235 °C and hold for 3.5 min.

### Chromatography

Chromatography was performed on silica gel (EMD, silica gel 60, particle size 0.040-0.063 mm) using standard flash techniques. Products were visualized by UV.

### Elemental analysis

Elemental analyses were obtained from the CENTC Elemental Analysis Facility at the University of Rochester using a Perkin Elmer PerkinElmer 2400 Series II Analyzer.

## 2. Optimization of hydroboration reaction workup

The general procedure was followed for the setup of the following optimization reactions.

Work-up 1: After 24 h, the reaction was filtered through a celite plug and CDCl<sub>3</sub> (0.6 mL) was used to wash the reaction vial. The washings were filtered through the plug and the crude was analyzed by <sup>1</sup>H NMR spectroscopy utilizing 2,4,6-trimethylbenzaldehyde as the internal standard.

Work-up 2: After 24 h, the reaction was filtered through a silica plug and CDCl<sub>3</sub> (0.6 mL) was used to wash the reaction vial. The washings were filtered through the plug and the crude was analyzed by <sup>1</sup>H NMR spectroscopy utilizing 2,4,6-trimethylbenzaldehyde as the internal standard.

Work-up 3: After 24 h, the reaction was filtered through a celite plug and the reaction vial was washed with DCM (5x 0.5 mL) and the washings were filtered through the plug. The crude reaction was concentrated *in vacuo* and analyzed by <sup>1</sup>H NMR spectroscopy utilizing 2,4,6-trimethylbenzaldehyde as the internal standard.

Work-up 4: After 24 h, the reaction was filtered through a silica plug and the reaction vial was washed with DCM (5x 0.5 mL) and the washings were filtered through the plug. The crude reaction was concentrated *in vacuo* and analyzed by <sup>1</sup>H NMR spectroscopy utilizing 2,4,6-trimethylbenzaldehyde as the internal standard.

**Table S1. Yields for various workup procedures**

| entry <sup>a</sup> | catalyst loading | Work-up # | wash solvent      | <b>3a</b> (%) <sup>b</sup> |
|--------------------|------------------|-----------|-------------------|----------------------------|
| 1                  | 0.50 mol %       | 1         | CDCl <sub>3</sub> | 68                         |
| 2                  | 0.50 mol %       | 2         | CDCl <sub>3</sub> | 62                         |
| 3                  | 0.50 mol %       | 3         | DCM               | >99                        |
| 4                  | 0.50 mol %       | 4         | DCM               | 86                         |

<sup>a</sup>Reaction conditions: alkene (0.5 mmol), HBpin (0.5 mmol), catalyst **1**, rt, 24 h. <sup>b</sup>Yield determined via <sup>1</sup>H NMR vs 2,4,6-trimethylbenzaldehyde as an internal standard.

Work-up 3 (entry 3) proved to be optimal for analyzing catalytic reactions.

### 3. Optimization of electron rich substrates

The general reaction setup was followed for the optimization of electron rich substrates. Under mild atom economical (equimolar) conditions, the reaction between *para*-methoxystyrene and HBpin does not afford a high yield. The use of excess HBpin or B<sub>2</sub>Pin<sub>2</sub> (entries 3-4) does result in an increase in yield. From our observations, the yield of the borylated product is likely dependent upon how much excess boron is available. When there is no excess boron available (1:1 ratio of alkene to boron), the <sup>1</sup>H NMR spectrum and GC-MS chromatogram shows full consumption of the boron species and remaining starting alkene and product.

### Table S2. Optimization of conditions

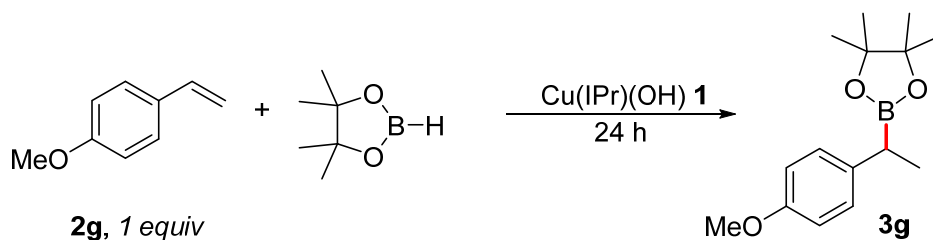

| Entry <sup>a</sup> | Catalyst Loading | THF (mL) | Boron Reagent                   | Boron mmol | Temperature | Yield <sup>b</sup> |
|--------------------|------------------|----------|---------------------------------|------------|-------------|--------------------|
| 1                  | 1 mol %          | 0.5      | HBpin                           | 0.5 mmol   | RT          | 43%                |
| 2                  | 1 mol %          | 0.5      | B <sub>2</sub> Pin <sub>2</sub> | 0.5 mmol   | RT          | 56%                |
| 3                  | 1 mol %          | 0.5      | HBpin                           | 1 mmol     | RT          | 49%                |
| 4                  | 1 mol %          | 0.5      | B <sub>2</sub> Pin <sub>2</sub> | 0.6 mmol   | RT          | 69%                |
| 5                  | 1 mol %          | --       | HBpin                           | 0.5 mmol   | RT          | 34%                |
| 6                  | 1.5 mol %        | --       | HBpin                           | 0.5 mmol   | RT          | 33%                |
| 7                  | 1 mol %          | 0.25     | HBpin                           | 0.5 mmol   | RT          | 30%                |
| 8                  | 1.5 mol %        | 0.25     | HBpin                           | 0.5 mmol   | RT          | 23%                |

<sup>a</sup>Reaction conditions: alkene (0.5 mmol), HBpin (0.5 mmol), catalyst **1**, THF (mL), rt, 24 h. <sup>b</sup>Yield determined via <sup>1</sup>H NMR spectroscopy vs 2,4,6-trimethylbenzaldehyde as an internal standard.

### 3.1 Time release optimization of electron rich substrates

The general reaction setup was followed for the time release studies. Reactions were run for 48 h.

**Entry 1:** HBpin (0.5 mmol, 1.0 equiv, 72.6  $\mu$ L) was added over 3 portions (24.2  $\mu$ L per portion). The first portion was added at the beginning of the reaction ( $t = 0$  min), the next portion was added at 2 h and the last was added at 24 h. The reaction was then allowed to stir another 24 h before workup.

**Entry 2:** HBpin (0.5 mmol, 1.0 equiv, 72.6  $\mu$ L) was added at the beginning of the reaction. After 24 h HBpin (0.5 mmol, 1.0 equiv, 72.6  $\mu$ L) was added again for a total of 2 equiv. The reaction was then allowed to stir another 24 h before workup.

**Table S3. Effect of Boron loading on products**

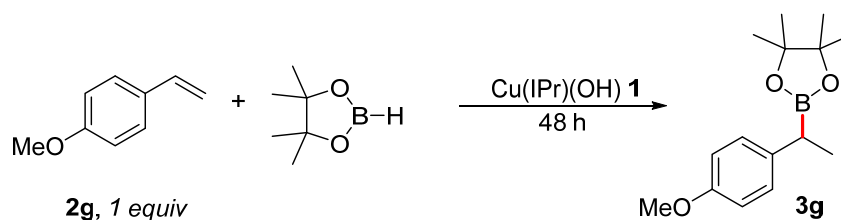

| Entry <sup>a</sup> | Catalyst Loading | Boron mmol | Temperature | ( <b>2g</b> : <b>3g</b> ) <sup>b</sup> |
|--------------------|------------------|------------|-------------|----------------------------------------|
| 1                  | 1 mol %          | 0.5 mmol   | RT          | (1.29:1)                               |
| 2                  | 1 mol %          | 1 mmol     | RT          | (1:1.38)                               |

<sup>a</sup>Reaction conditions: alkene (0.5 mmol), HBpin (0.5 mmol), catalyst **1**, rt, 48 h. <sup>b</sup>Ratio of (**2**:**3**) determined via <sup>1</sup>H NMR spectroscopy vs 2,4,6-trimethylbenzaldehyde as an internal standard.

#### 4. General procedure for stoichiometric studies

##### Stoichiometric reaction of **1** with HBpin in THF-*d*<sub>8</sub>

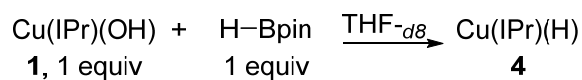

In a nitrogen-filled glovebox: an oven-dried J-Young NMR test tube was charged with Cu(IPr)(OH) (0.05 mmol, 1.0 equiv, 23.5 mg) and THF-*d*<sub>8</sub> (0.6 mL) resulting in a colorless solution. Next, HBpin (0.05 mmol, 1.0 equiv, 6.5 mg, 7.3  $\mu$ L) was added and upon mixing the solution immediately became bright yellow in color. The tube was capped and brought out of the glovebox and the <sup>1</sup>H NMR spectrum was recorded as soon as possible (*ca.* 5 min) thereafter.

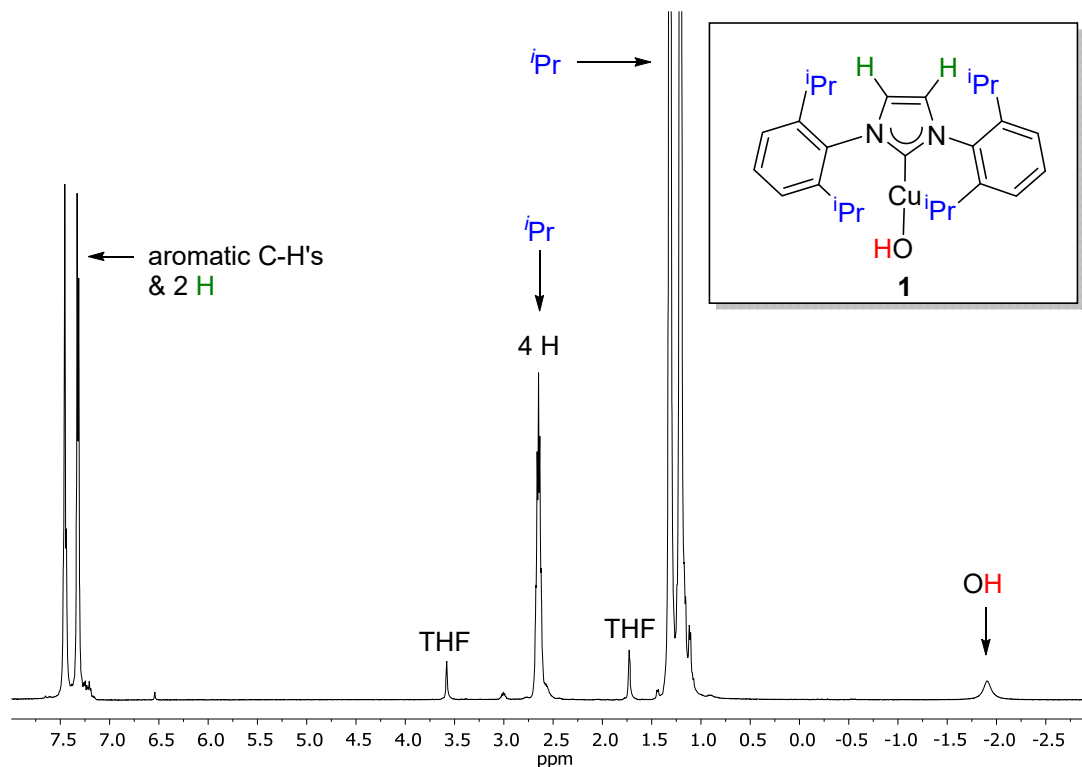

**Figure S1.** <sup>1</sup>H NMR spectra of **1** in THF-*d*<sub>8</sub>.

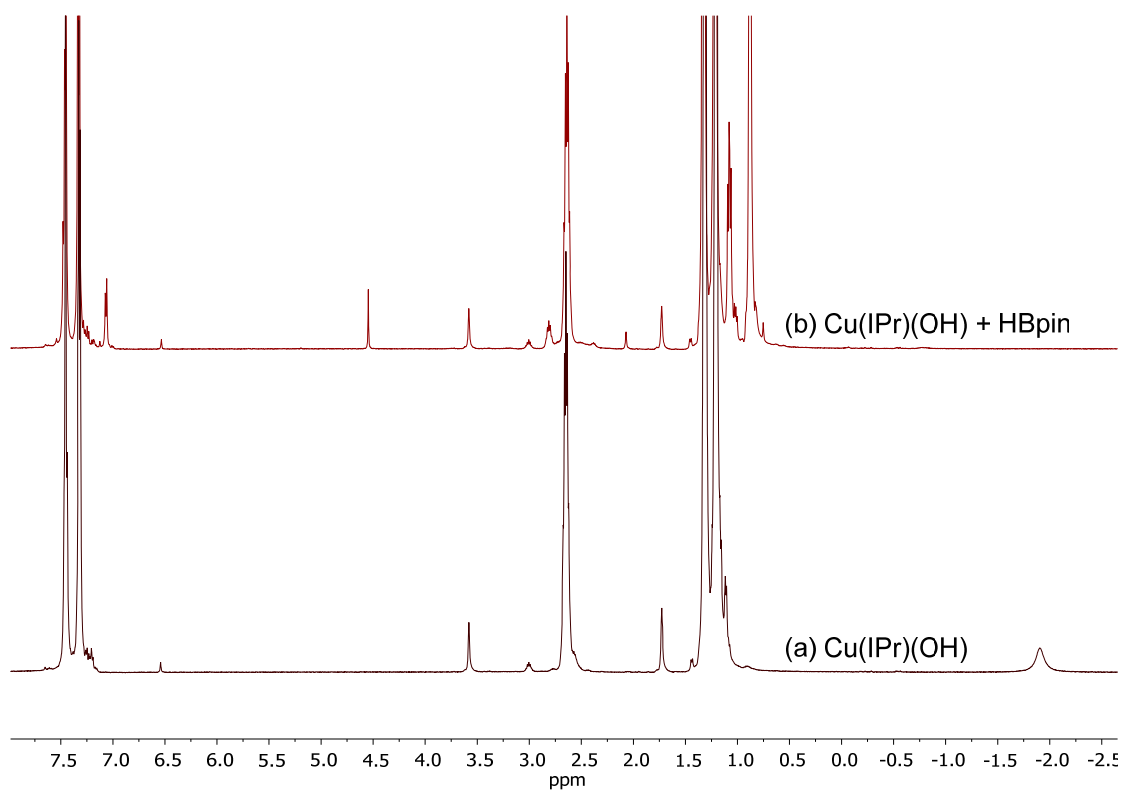

**Figure S2.**  $^1\text{H}$  NMR spectra in THF- $d_8$  of the stoichiometric reaction of **1** with HBpin. (a) before the addition of HBpin. (b) after the addition of HBpin (*ca.* 5 min).



Stoichiometric reaction of **1** with HBpin in C<sub>6</sub>D<sub>6</sub>

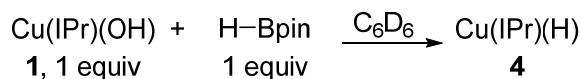

In a nitrogen-filled glovebox: an oven-dried J-Young NMR test tube was charged with Cu(IPr)(OH) (0.05 mmol, 1.0 equiv, 23.5 mg) and C<sub>6</sub>D<sub>6</sub> (0.6 mL) resulting in a colorless solution. Next, HBpin (0.05 mmol, 1.0 equiv, 6.5 mg, 7.3  $\mu$ L) was added and upon mixing the solution immediately became bright yellow in color. The tube was capped and brought out of the glovebox and the <sup>1</sup>H NMR spectrum was recorded as soon as possible (*ca.* 5 min) thereafter.

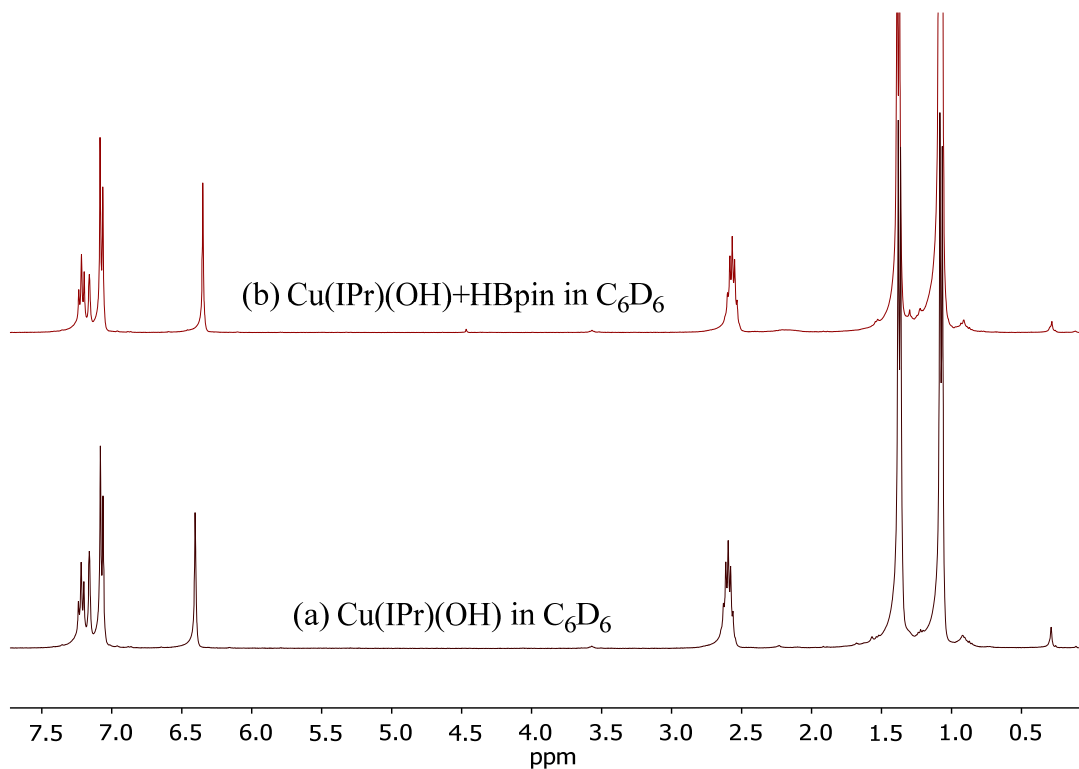

**Figure S3.** <sup>1</sup>H NMR spectra in C<sub>6</sub>D<sub>6</sub> of the stoichiometric reaction of **1** with HBpin. (a) before the addition of HBpin. (b) after the addition of HBpin (*ca.* 5 min).

Stoichiometric reaction of **4** with HBpin and alkene **2a**

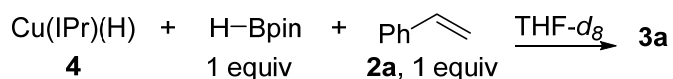

In a nitrogen-filled glovebox: an oven-dried J-Young NMR test tube was charged with Cu(IPr)(OH) (0.05 mmol, 1 equiv, 23.5 mg) and THF-*d*<sub>8</sub> (0.6 mL) resulting in a colorless solution. Next, HBpin (0.05 mmol, 1 equiv, 6.5 mg, 7.3  $\mu$ L) was added and upon mixing the solution immediately became bright yellow in color. The bright yellow solution indicates the formation of **4**. Next, **2a** (0.05 mmol, 1 equiv, 5.2 mg, 5.7  $\mu$ L) and HBpin (0.05 mmol, 1 equiv, 6.5 mg, 7.3  $\mu$ L) were quickly added and the tube was capped and brought out of the glovebox and reaction progress was monitored by <sup>1</sup>H NMR spectroscopy.

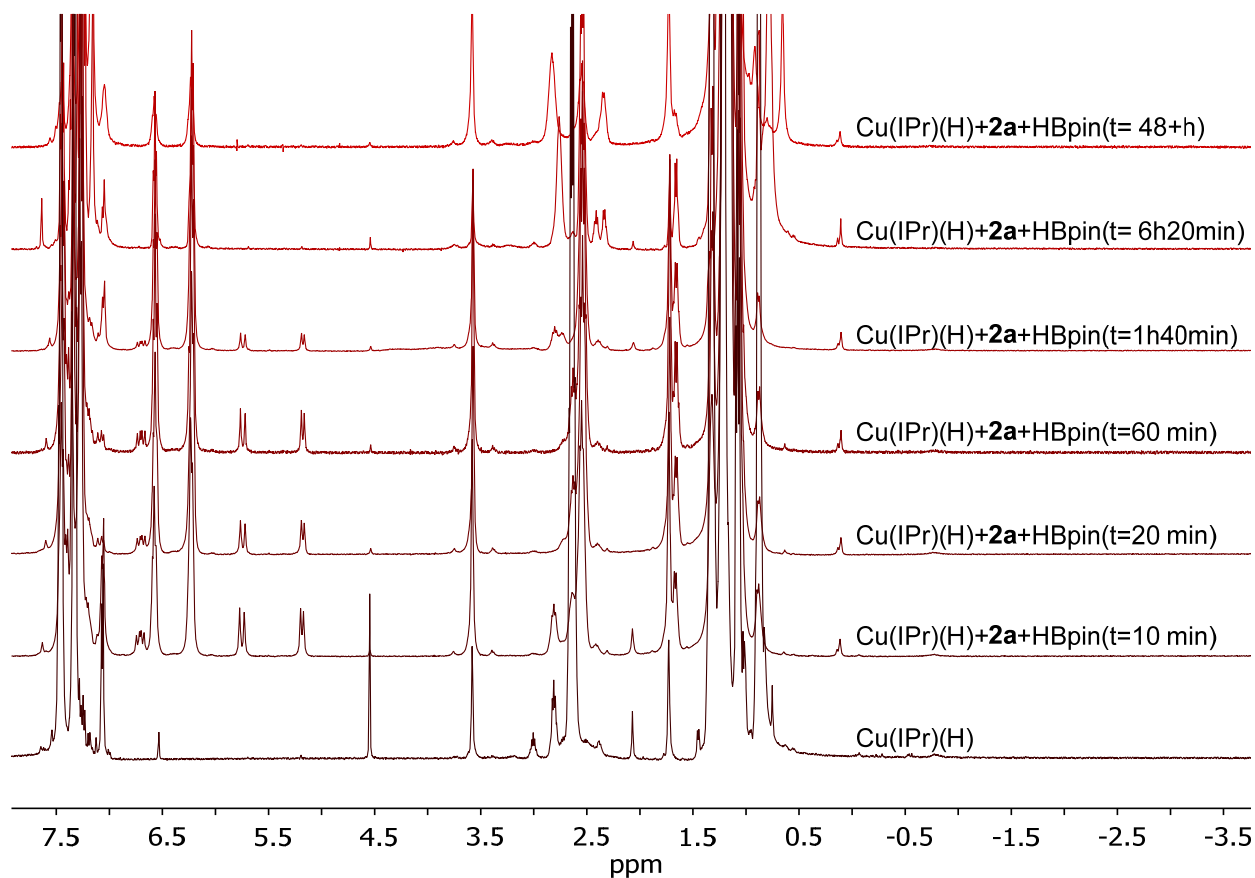

**Figure S4.** <sup>1</sup>H NMR spectra in THF-*d*<sub>8</sub> of the stoichiometric reaction of **4** with HBpin and **2a**.

## 5. Product characterization

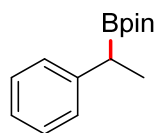

**3a**

### 4,4,5,5-tetramethyl-2-(1-phenylethyl)-1,3,2-dioxaborolane

The general procedure for hydroboration was followed with styrene (0.5 mmol, 1.0 equiv, 57.5  $\mu$ L) and 4,4,5,5-tetramethyl-1,3,2-dioxaborolane (0.5 mmol, 1.0 equiv, 72.6  $\mu$ L). Spectroscopic data matches the reported literature.<sup>3</sup>

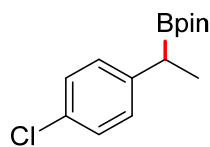

**3b**

### 2-(1-(4-chlorophenyl)ethyl)-4,4,5,5-tetramethyl-1,3,2-dioxaborolane

The general procedure for hydroboration was followed with 4-chlorostyrene (0.5 mmol, 1.0 equiv, 60.0  $\mu$ L) and 4,4,5,5-tetramethyl-1,3,2-dioxaborolane (0.5 mmol, 1.0 equiv, 72.6  $\mu$ L). Spectroscopic data matches the reported literature.<sup>4</sup>

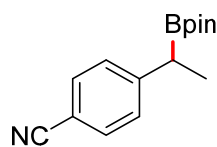

**3c**

### 4-(1-(4,4,5,5-tetramethyl-1,3,2-dioxaborolan-2-yl)ethyl)benzonitrile

The general procedure for hydroboration was followed with 4-cyanostyrene (0.5 mmol, 1.0 equiv, 60.0  $\mu$ L) and 4,4,5,5-tetramethyl-1,3,2-dioxaborolane (0.5 mmol, 1.0 equiv, 72.6  $\mu$ L). Spectroscopic data matches the reported literature.<sup>5</sup>

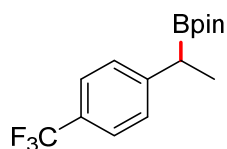

**3d**

### 4,4,5,5-tetramethyl-2-(1-(4-(trifluoromethyl)phenyl)ethyl)-1,3,2-dioxaborolane

The general procedure for hydroboration was followed with 4-trifluoromethylstyrene (0.5 mmol, 1.0 equiv, 73.9  $\mu$ L) and 4,4,5,5-tetramethyl-1,3,2-dioxaborolane (0.5 mmol, 1.0 equiv, 72.6  $\mu$ L). Spectroscopic data matches the reported literature.<sup>4</sup>

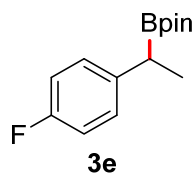

**2-(1-(4-fluorophenyl)ethyl)-4,4,5,5-tetramethyl-1,3,2-dioxaborolane**

The general procedure for hydroboration was followed with 4-fluorostyrene (0.5 mmol, 1.0 equiv, 59.6  $\mu$ L) and 4,4,5,5-tetramethyl-1,3,2-dioxaborolane (0.5 mmol, 1.0 equiv, 72.6  $\mu$ L). Spectroscopic data matches the reported literature.<sup>5,6</sup>

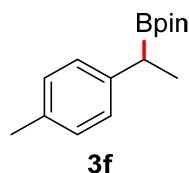

**4,4,5,5-tetramethyl-2-(1-(p-tolyl)ethyl)-1,3,2-dioxaborolane**

The general procedure for hydroboration was followed with 4-methylstyrene (0.5 mmol, 1.0 equiv, 65.9  $\mu$ L) and 4,4,5,5-tetramethyl-1,3,2-dioxaborolane (0.5 mmol, 1.0 equiv, 72.6  $\mu$ L). Spectroscopic data matches the reported literature.<sup>7</sup>

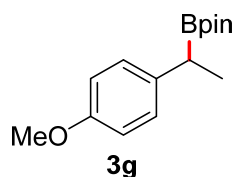

**2-(1-(4-methoxyphenyl)ethyl)-4,4,5,5-tetramethyl-1,3,2-dioxaborolane**

The general procedure for hydroboration was followed with 4-methoxystyrene (0.5 mmol, 1.0 equiv, 66.5  $\mu$ L) and 4,4,5,5-tetramethyl-1,3,2-dioxaborolane (0.5 mmol, 1.0 equiv, 72.6  $\mu$ L). Spectroscopic data matches the reported literature.<sup>4</sup>

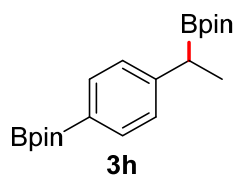

**4,4,5,5-tetramethyl-2-(4-(1-(4,4,5,5-tetramethyl-1,3,2-dioxaborolan-2-yl)ethyl)phenyl)-1,3,2-dioxaborolane**

The general procedure for hydroboration was followed with 2-(4-ethenylphenyl)-4,4,5,5-tetramethyl-1,3,2-dioxaborolane (0.5 mmol, 1.0 equiv, 0.115g) and 4,4,5,5-tetramethyl-1,3,2-dioxaborolane (0.5 mmol, 1.0 equiv, 72.6  $\mu$ L). Spectroscopic data matches the reported literature.<sup>8</sup>

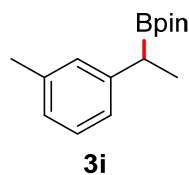

**4,4,5,5-tetramethyl-2-(1-(m-tolyl)ethyl)-1,3,2-dioxaborolane**

The general procedure for hydroboration was followed with 3-methylstyrene (0.5 mmol, 1.0 equiv, 66.4  $\mu$ L) and 4,4,5,5-tetramethyl-1,3,2-dioxaborolane (0.5 mmol, 1.0 equiv, 72.6  $\mu$ L). Spectroscopic data matches the reported literature.<sup>5</sup>

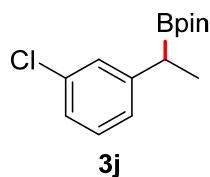

**2-(1-(3-chlorophenyl)ethyl)-4,4,5,5-tetramethyl-1,3,2-dioxaborolane**

The general procedure for hydroboration was followed with 3-chlorostyrene (0.5 mmol, 1.0 equiv, 63.6  $\mu$ L) and 4,4,5,5-tetramethyl-1,3,2-dioxaborolane (0.5 mmol, 1.0 equiv, 72.6  $\mu$ L). Spectroscopic data matches the reported literature.<sup>9</sup>

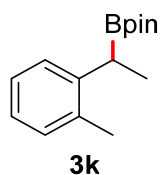

**4,4,5,5-tetramethyl-2-(1-(o-tolyl)ethyl)-1,3,2-dioxaborolane**

The general procedure for hydroboration was followed with 2-methylstyrene (0.5 mmol, 1.0 equiv, 64.6  $\mu$ L) and 4,4,5,5-tetramethyl-1,3,2-dioxaborolane (0.5 mmol, 1.0 equiv, 72.6  $\mu$ L). Spectroscopic data matches the reported literature.<sup>4</sup>

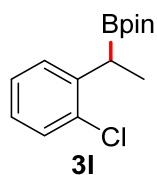

**2-(1-(2-chlorophenyl)ethyl)-4,4,5,5-tetramethyl-1,3,2-dioxaborolane**

The general procedure for hydroboration was followed with 2-chlorostyrene (0.5 mmol, 1.0 equiv, 64.2  $\mu$ L) and 4,4,5,5-tetramethyl-1,3,2-dioxaborolane (0.5 mmol, 1.0 equiv, 72.6  $\mu$ L). Spectroscopic data matches the reported literature.<sup>4</sup>

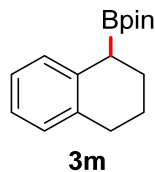

**4,4,5,5-tetramethyl-2-(1,2,3,4-tetrahydronaphthalen-1-yl)-1,3,2-dioxaborolane**

The general procedure for hydroboration was followed with 1,2-dihydronaphthalene (0.5 mmol, 1.0 equiv, 65.3  $\mu$ L) and 4,4,5,5-tetramethyl-1,3,2-dioxaborolane (0.5 mmol, 1.0 equiv, 72.6  $\mu$ L). Spectroscopic data matches the reported literature.<sup>10</sup>

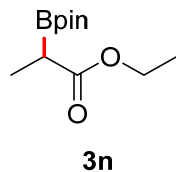

**ethyl 2-(4,4,5,5-tetramethyl-1,3,2-dioxaborolan-2-yl)propanoate**

The general procedure for hydroboration was followed with ethyl acrylate (0.5 mmol, 1.0 equiv, 54.5  $\mu$ L) and 4,4,5,5-tetramethyl-1,3,2-dioxaborolane (0.5 mmol, 1.0 equiv, 72.6  $\mu$ L). Spectroscopic data matches the reported literature.<sup>11</sup>

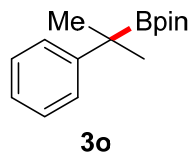

**4,4,5,5-tetramethyl-2-(2-phenylpropan-2-yl)-1,3,2-dioxaborolane**

The general procedure for hydroboration was followed with  $\alpha$ -methylstyrene (0.5 mmol, 1.0 equiv, 65.0  $\mu$ L) and 4,4,5,5-tetramethyl-1,3,2-dioxaborolane (0.5 mmol, 1.0 equiv, 72.6  $\mu$ L).

NOTE: no borylation (branched or linear) of the alkene was observed by NMR spectroscopy, but some (<5%) branched isomer was seen by GCMS.

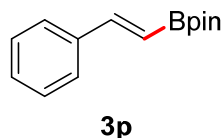

**(E)-4,4,5,5-tetramethyl-2-styryl-1,3,2-dioxaborolane**

The general procedure for hydroboration was followed with ethynylbenzene (0.5 mmol, 1.0 equiv, 54.9  $\mu$ L) and 4,4,5,5-tetramethyl-1,3,2-dioxaborolane (0.5 mmol, 1.0 equiv, 72.6  $\mu$ L). Spectroscopic data matches the reported literature.<sup>12</sup>

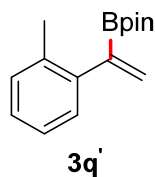

**4,4,5,5-tetramethyl-2-(1-(o-tolyl)vinyl)-1,3,2-dioxaborolane**

The general procedure for hydroboration was followed with 1-ethynyl-2-methylbenzene (0.5 mmol, 1.0 equiv, 63.0  $\mu$ L) and 4,4,5,5-tetramethyl-1,3,2-dioxaborolane (0.5 mmol, 1.0 equiv, 72.6  $\mu$ L). Spectroscopic data matches the reported literature.<sup>12</sup>

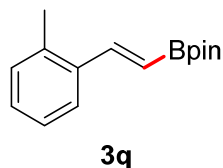

**(E)-4,4,5,5-tetramethyl-2-(2-methylstyryl)-1,3,2-dioxaborolane**

The general procedure for hydroboration was followed with 1-ethynyl-2-methylbenzene (0.5 mmol, 1.0 equiv, 63.0  $\mu$ L) and 4,4,5,5-tetramethyl-1,3,2-dioxaborolane (0.5 mmol, 1.0 equiv, 72.6  $\mu$ L). Spectroscopic data matches the reported literature.<sup>12</sup>

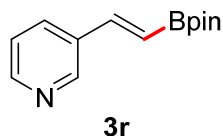

**(E)-3-(2-(4,4,5,5-tetramethyl-1,3,2-dioxaborolan-2-yl)vinyl)pyridine**

The general procedure for hydroboration was followed with 3-ethynylpyridine (0.5 mmol, 1.0 equiv, 0.052 g) and 4,4,5,5-tetramethyl-1,3,2-dioxaborolane (0.5 mmol, 1.0 equiv, 72.6  $\mu$ L). Spectroscopic data matches the reported literature.<sup>13</sup>

<sup>1</sup>H NMR (400 MHz, CDCl<sub>3</sub>)  $\delta$  8.57 (s, 1H), 8.39 (d,  $J$  = 4.4 Hz, 1H), 7.67 (d,  $J$  = 7.7 Hz, 1H), 7.26 (d,  $J$  = 18.4 Hz, 1H), 7.14 (dd,  $J$  = 7.6, 4.9 Hz, 1H), 6.14 (d,  $J$  = 18.5 Hz, 1H), 1.20 (s, 12H).

GC-MS: 231 (M<sup>+</sup>)

Line#:1 R.Time:10.358(Scan#:1243)  
MassPeaks:424  
RawMode:Single 10.358(1243) BasePeak:132.10(9820971)  
BG Mode:None

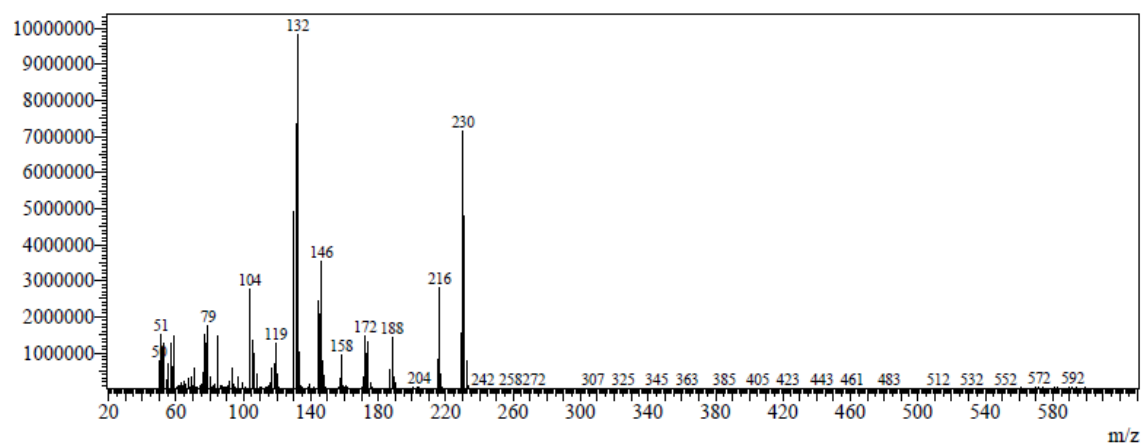

Figure S5. GC-MS chromatogram of borylated product **3r**.



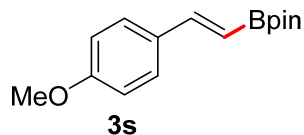

**(E)-2-(4-methoxystyryl)-4,4,5,5-tetramethyl-1,3,2-dioxaborolane**

The general procedure for hydroboration was followed with 1-ethynyl-4-methoxybenzene (0.5 mmol, 1.0 equiv, 64.8  $\mu$ L) and 4,4,5,5-tetramethyl-1,3,2-dioxaborolane (0.5 mmol, 1.0 equiv, 72.6  $\mu$ L). Spectroscopic data matches the reported literature.<sup>12</sup>

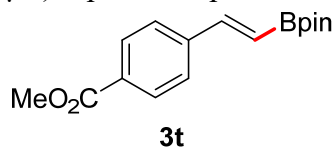

**methyl (E)-4-(2-(4,4,5,5-tetramethyl-1,3,2-dioxaborolan-2-yl)vinyl)benzoate**

The general procedure for hydroboration was followed with methyl 4-ethynylbenzoate (0.5 mmol, 1.0 equiv, 0.080 g) and 4,4,5,5-tetramethyl-1,3,2-dioxaborolane (0.5 mmol, 1.0 equiv, 72.6  $\mu$ L). Spectroscopic data matches the reported literature.<sup>14</sup>

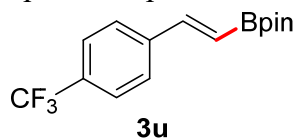

**(E)-4,4,5,5-tetramethyl-2-(4-(trifluoromethyl)styryl)-1,3,2-dioxaborolane**

The general procedure for hydroboration was followed with 1-ethynyl-4-(trifluoromethyl)benzene (0.5 mmol, 1.0 equiv, 81.6  $\mu$ L) and 4,4,5,5-tetramethyl-1,3,2-dioxaborolane (0.5 mmol, 1.0 equiv, 72.6  $\mu$ L). Spectroscopic data matches the reported literature.<sup>12</sup>

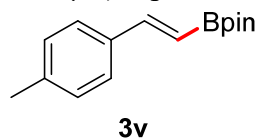

**(E)-4,4,5,5-tetramethyl-2-(4-methylstyryl)-1,3,2-dioxaborolane**

The general procedure for hydroboration was followed with 1-ethynyl-4-methylbenzene (0.5 mmol, 1.0 equiv, 63.4  $\mu$ L) and 4,4,5,5-tetramethyl-1,3,2-dioxaborolane (0.5 mmol, 1.0 equiv, 72.6  $\mu$ L). Spectroscopic data matches the reported literature.<sup>12</sup>

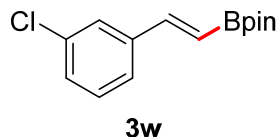

**(E)-2-(3-chlorostyryl)-4,4,5,5-tetramethyl-1,3,2-dioxaborolane**

The general procedure for hydroboration was followed with 1-chloro-3-ethynylbenzene (0.5 mmol, 1.0 equiv, 61.6  $\mu$ L) and 4,4,5,5-tetramethyl-1,3,2-dioxaborolane (0.5 mmol, 1.0 equiv, 72.6  $\mu$ L). Spectroscopic data matches the reported literature.<sup>12</sup>

**6. Large scale reaction**

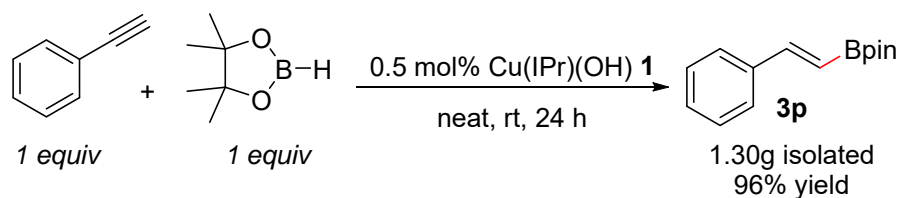

General procedure for hydroboration was followed for the large scale reaction, with slight modifications (vial size, workup). In a glovebox, an oven-dried 2-dram vial containing a stir bar was charged with Cu(IPr)(OH) (0.50 mol %, 0.05 equiv), phenylacetylene (5.9 mmol, 1.0 equiv, 0.648mL), and HBpin (5.9 mmol, 1.0 equiv, 0.856mL). Note the reaction was highly exothermic and was allowed to cool enough to touch the vial before the reaction was capped and removed from the glovebox and stirred at room temperature for 24h. The reaction was then filtered through a celite (5mL)/silica (5mL) plug. The vial was washed with an eluent of 8:2 hexanes/ethyl acetate and added to the plug. The plug was then washed with 350mL of the 8:2 hexanes/ethyl acetate eluent. The combined washings were concentrated *in vacuo* and dried on a vacuum line to afford **3p** (1.30g, 96% yield). Spectroscopic data matches the reported data.<sup>12</sup>

<sup>1</sup>H NMR (400 MHz, CDCl<sub>3</sub>) δ 7.47 (d, *J* = 7.0 Hz, 2H), 7.38 (d, *J* = 18.5 Hz, 1H), 7.34 – 7.20 (m, 3H), 6.15 (d, *J* = 18.4 Hz, 1H).

<sup>13</sup>C NMR (101 MHz, CDCl<sub>3</sub>) δ 149.65, 137.59, 129.03, 128.70, 127.19, 83.49, 24.94.

<sup>13</sup>C NMR DEPT-135 (101 MHz, CDCl<sub>3</sub>) δ 149.50, 128.89, 128.56, 127.05, 24.81.

Substrate 3p  
 Avance 400  
 Proton NMR  
 CDCl<sub>3</sub>

<sup>1</sup>H NMR (400 MHz, CDCl<sub>3</sub>) δ 7.47 (d, *J* = 7.0 Hz, 2H), 7.38 (d, *J* = 18.5 Hz, 1H),  
 7.34 – 7.20 (m, 3H), 6.15 (d, *J* = 18.4 Hz, 1H).

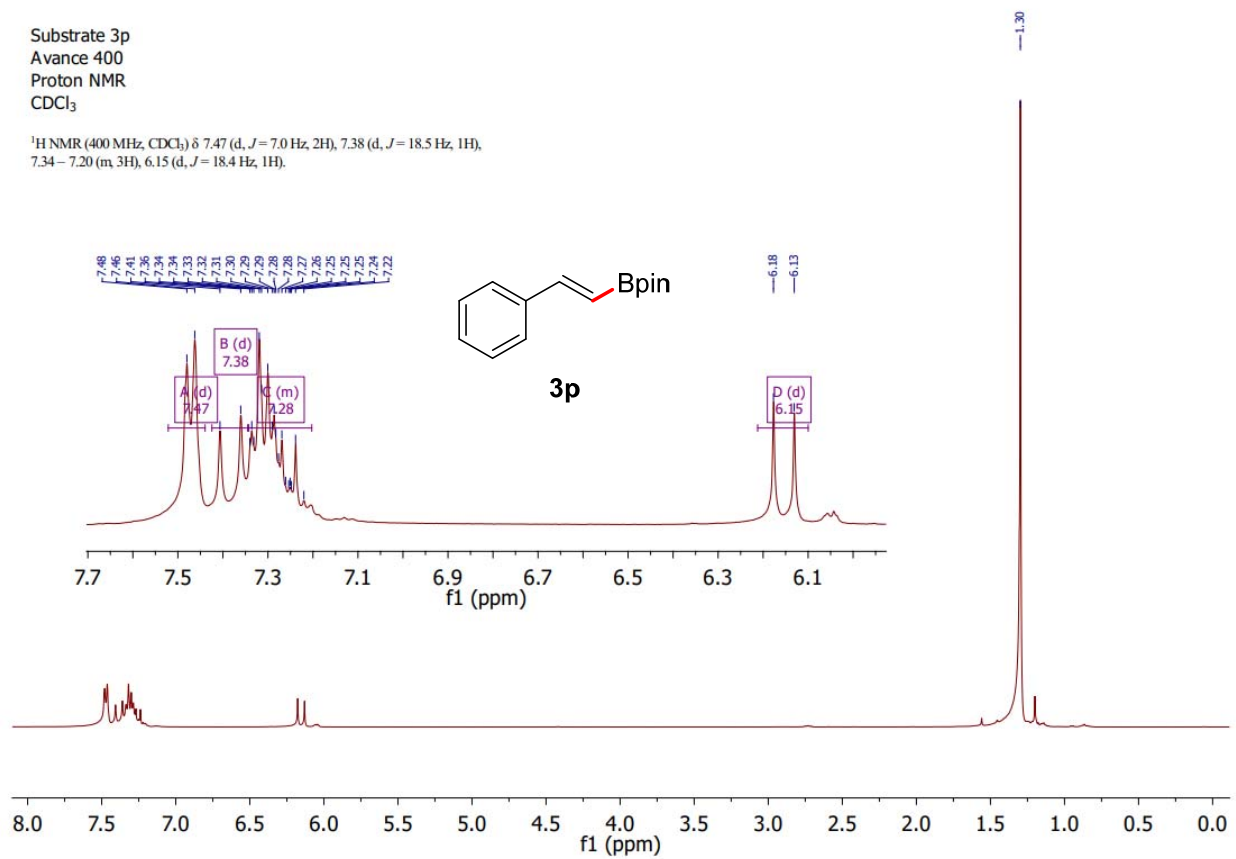

**Figure S6.** <sup>1</sup>H NMR spectrum of borylated product **3p**.

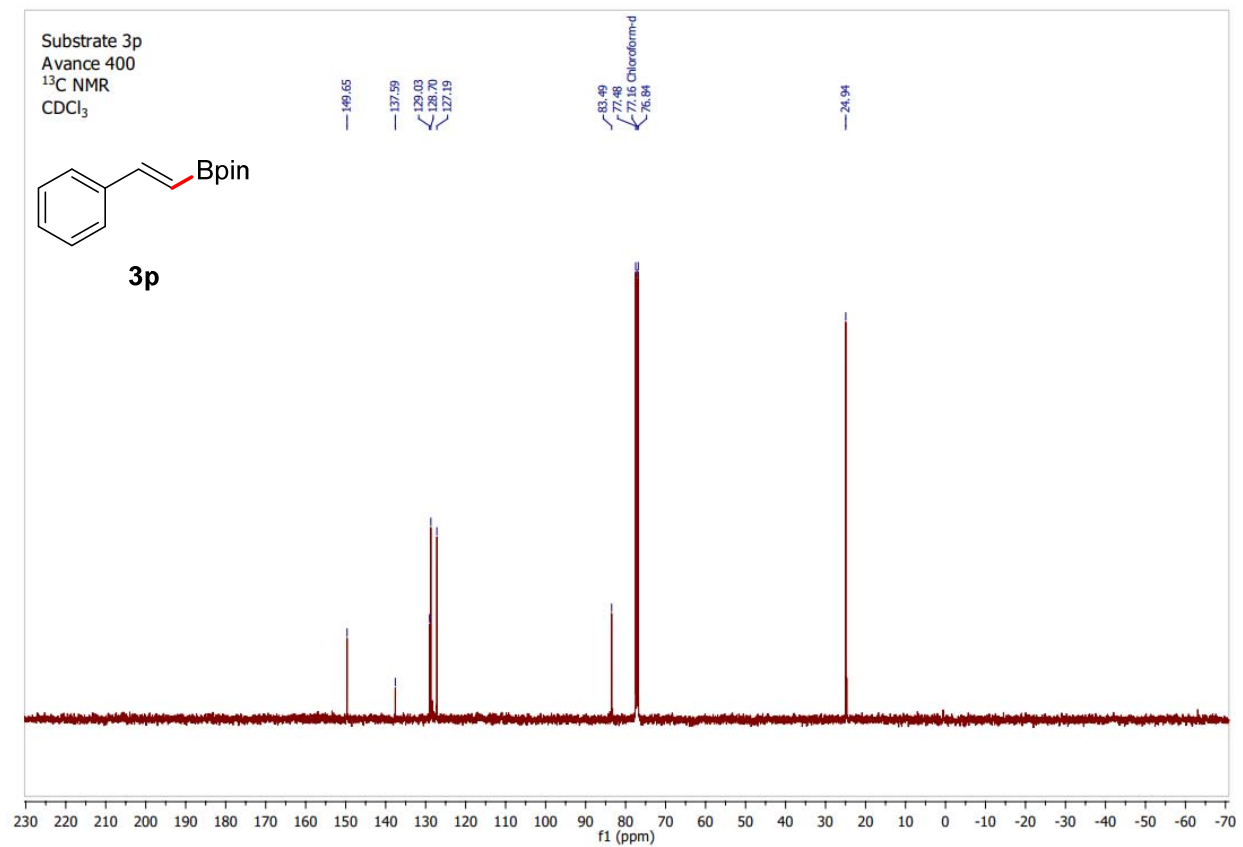

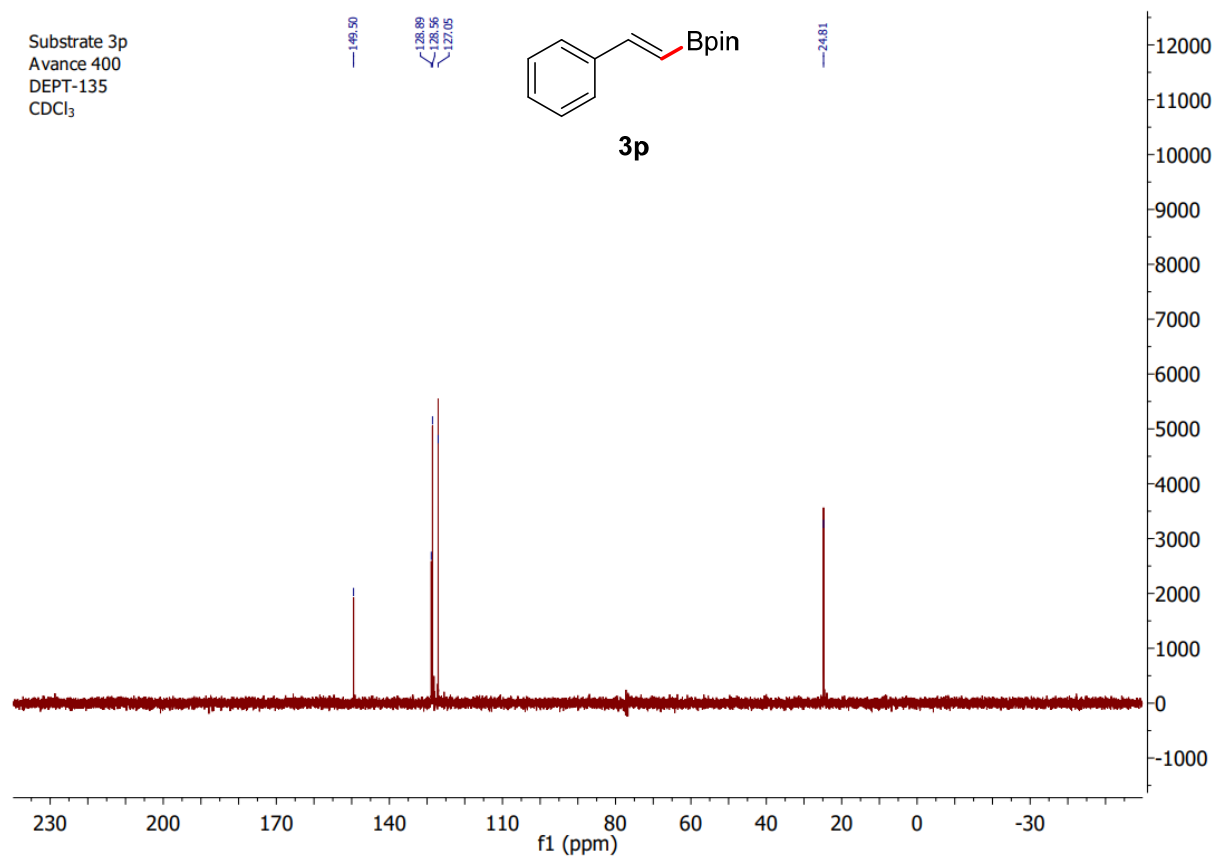

**Figure S7.**  $^{13}\text{C}\{^1\text{H}\}$  NMR spectrum and  $^{13}\text{C}\{^1\text{H}\}$  NMR DEPT-135 spectrum of borylated product **3p**.

## 7. Unsuccessful substrates

The substrates shown below were run following the general procedure for hydroboration. Note that the substrates that ended up in this table showed less than a 25% yield by  $^1\text{H}$  NMR spectroscopy using 2,4,6-trimethylbenzaldehyde as the internal standard. For 4-bromostyrene and 1-ethynylcyclohex-1-ene, two hydroboration products were observed. In the case of 4-bromostyrene we saw competition for borylation at both the alkene and the bromide, and for 1-ethynylcyclohex-1-ene we saw competition for borylation at both the alkene and alkyne. The unselective borylation made the determination of yields by  $^1\text{H}$  NMR spectroscopy unreliable; the GCMS chromatograms showed many products.

**Table S4. Unsuccessful substrates**

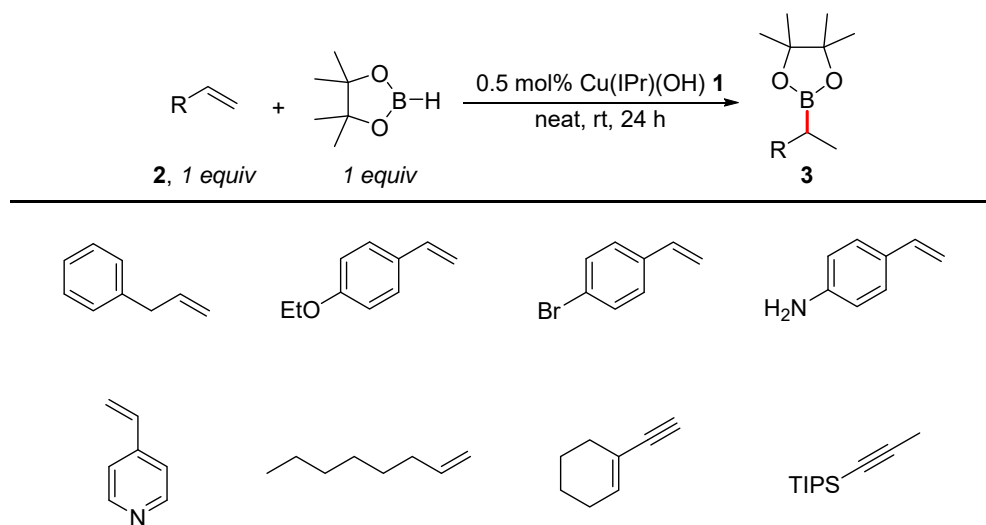

## 8. GCMS Data

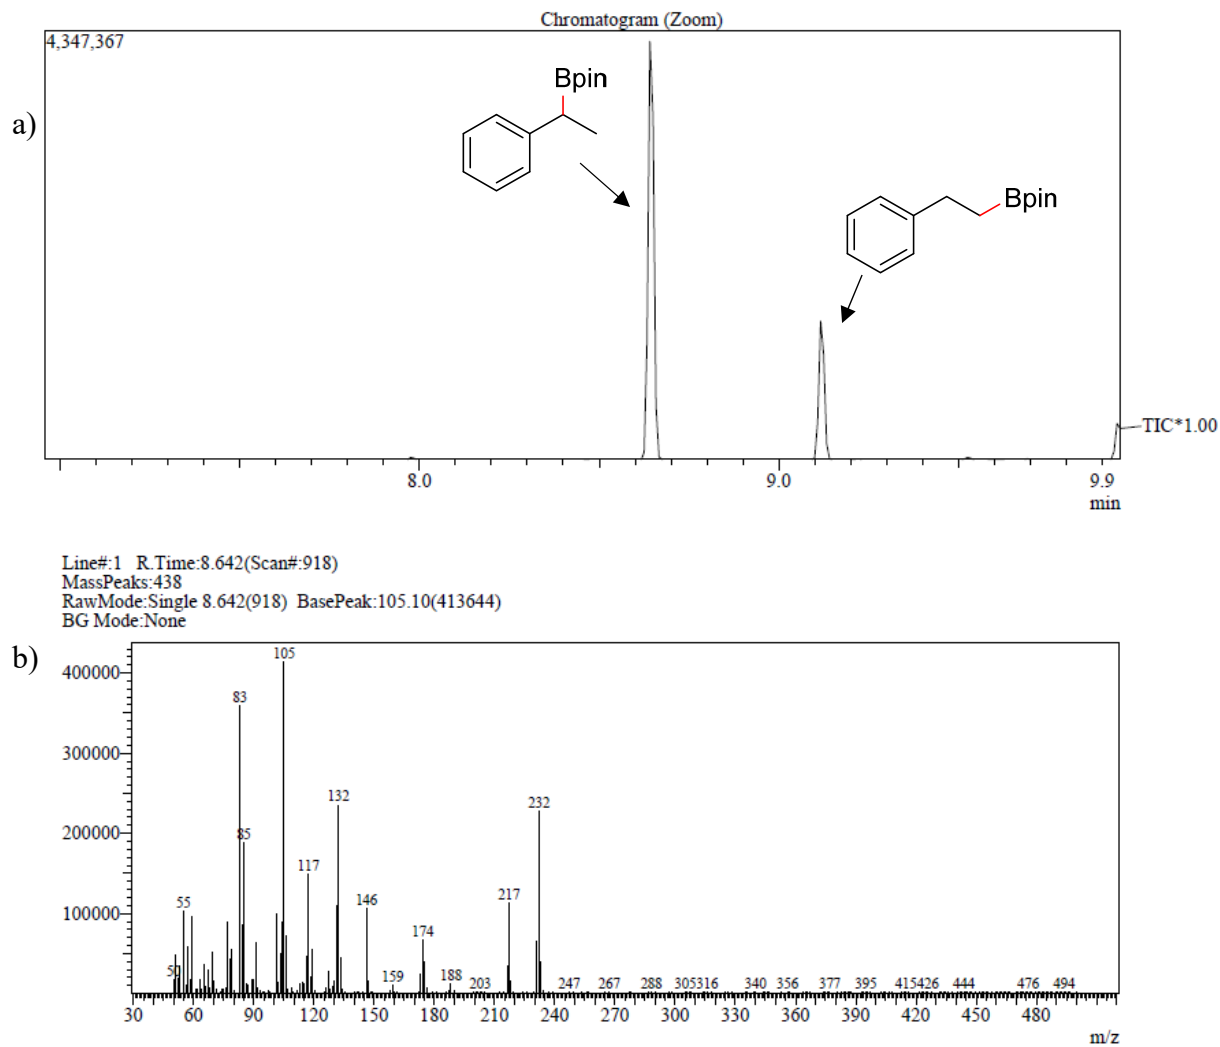

**Figure S8.** GC-MS chromatograms of authentic samples of the branched and linear borylated products.

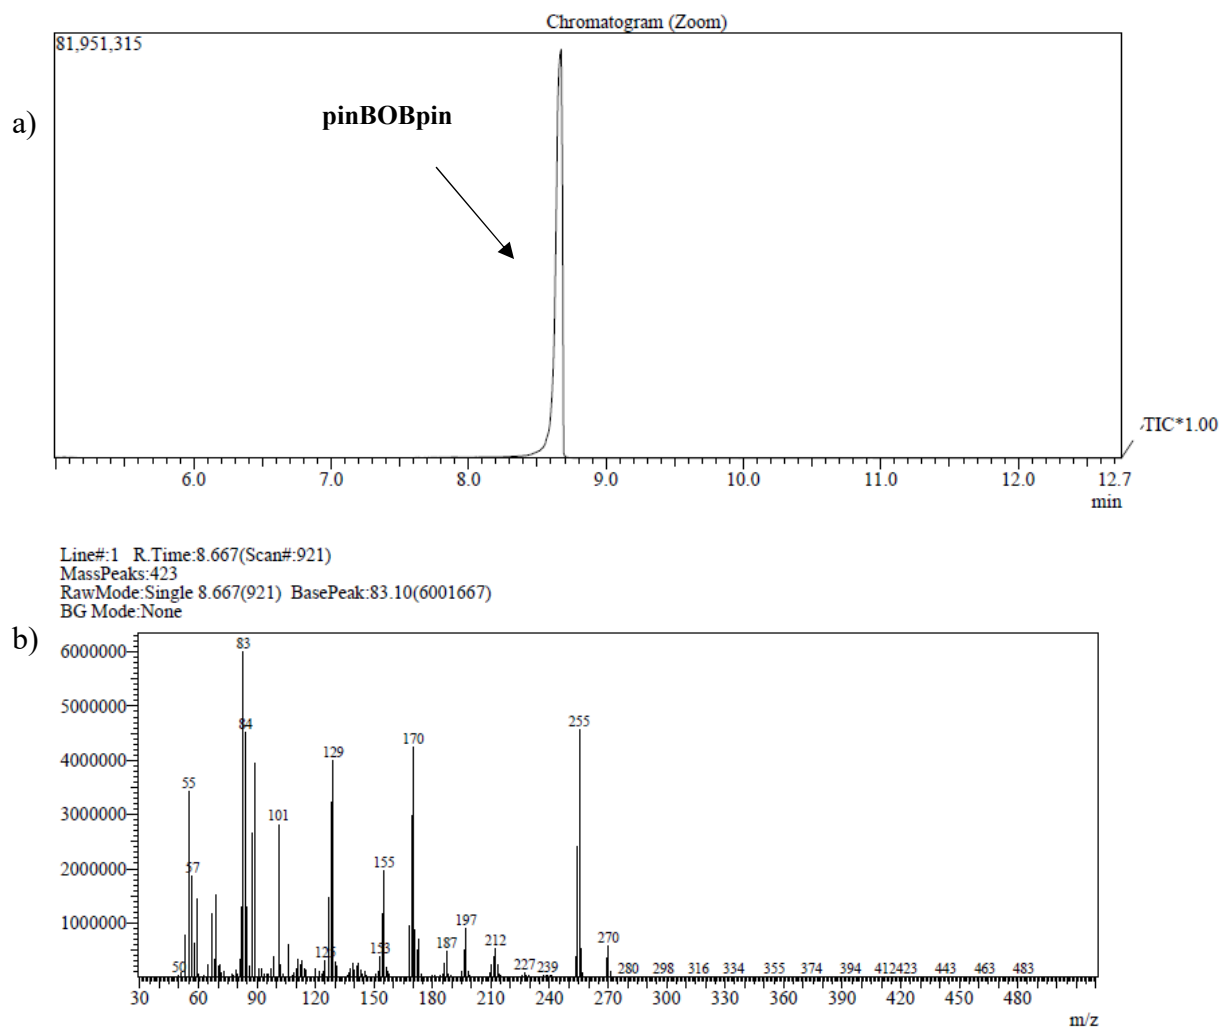

**Figure S9.** GC-MS chromatograms of authentic sample of 2,2'-oxybis(4,4,5,5-tetramethyl-1,3,2-dioxaborolane). The compound was independently synthesized according to Stephan's procedure see ref. 16.<sup>15</sup>



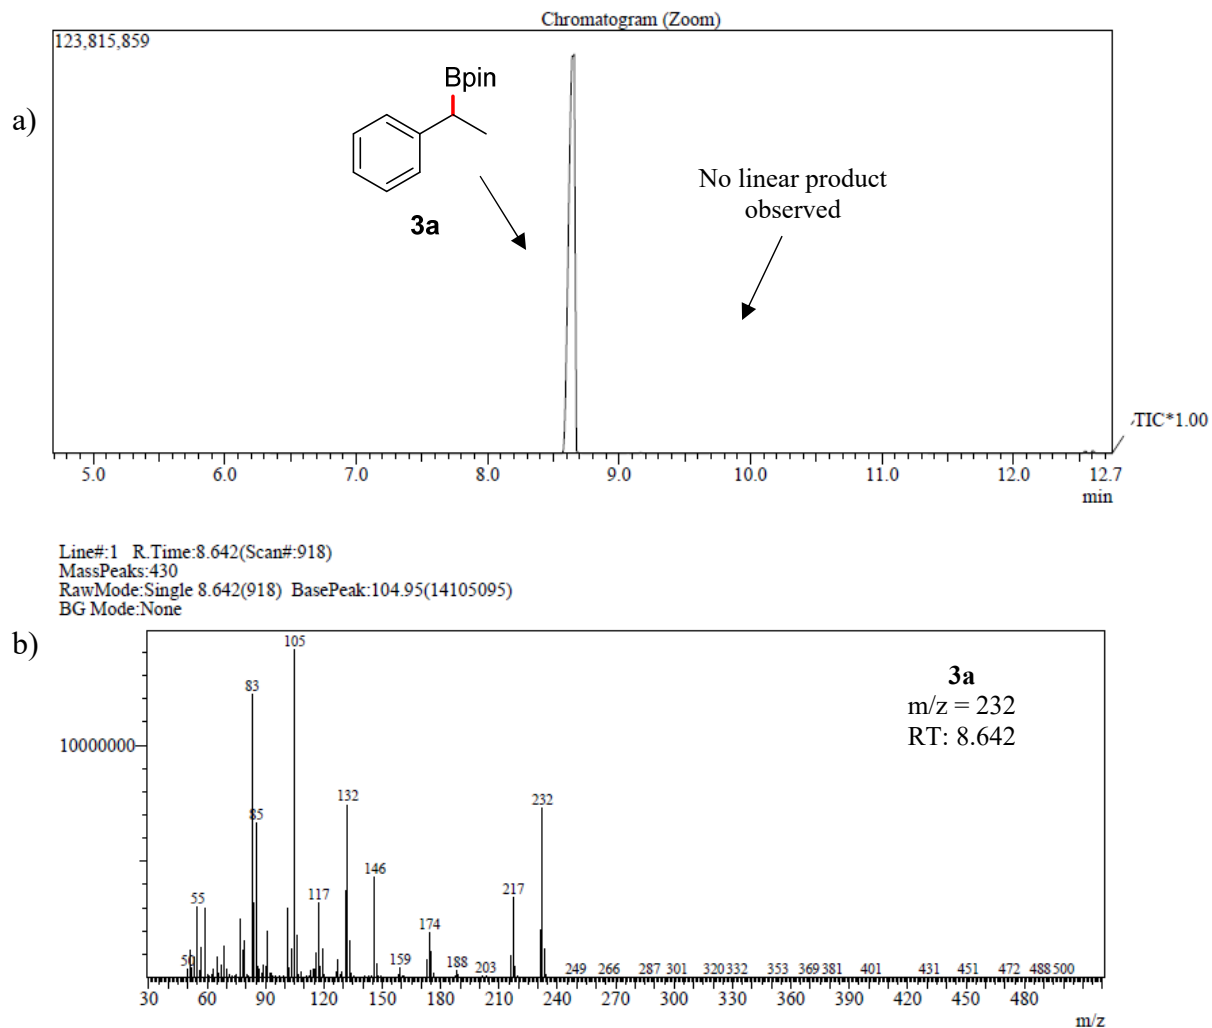

**Figure S10.** GC-MS chromatograms of product **3a**.

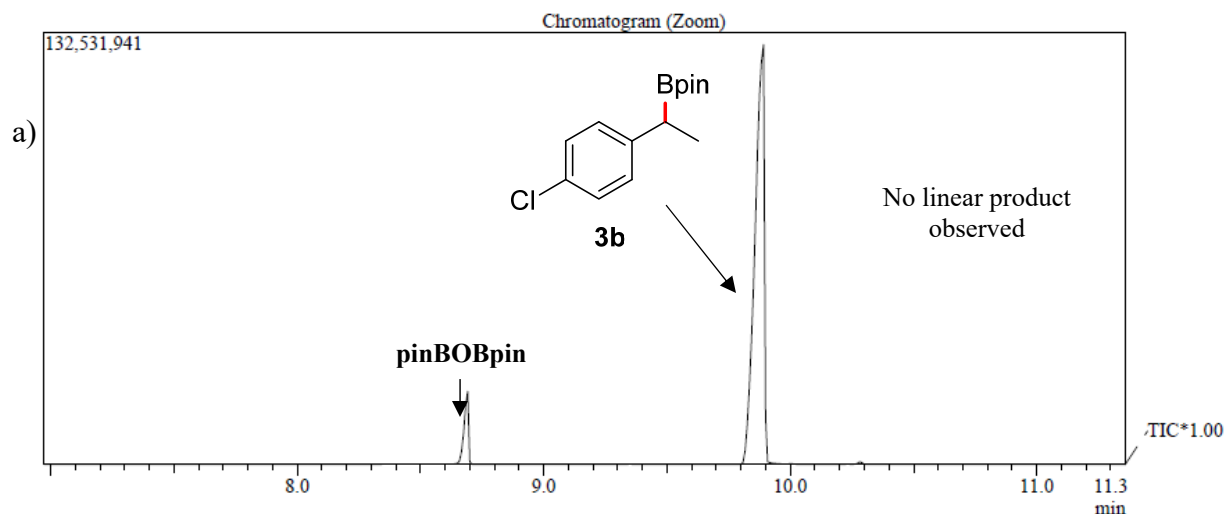

Line#:1 R.Time:9.883(Scan#:1067)  
 MassPeaks:434  
 RawMode:Single 9.883(1067) BasePeak:231.15(14238739)  
 BG Mode:None

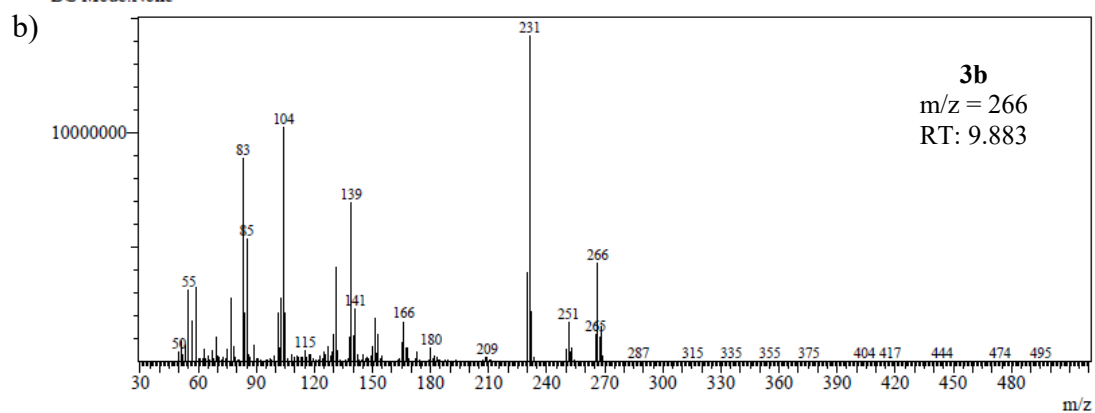

Line#:1 R.Time:8.683(Scan#:923)  
 MassPeaks:437  
 RawMode:Single 8.683(923) BasePeak:255.20(1446225)  
 BG Mode:None

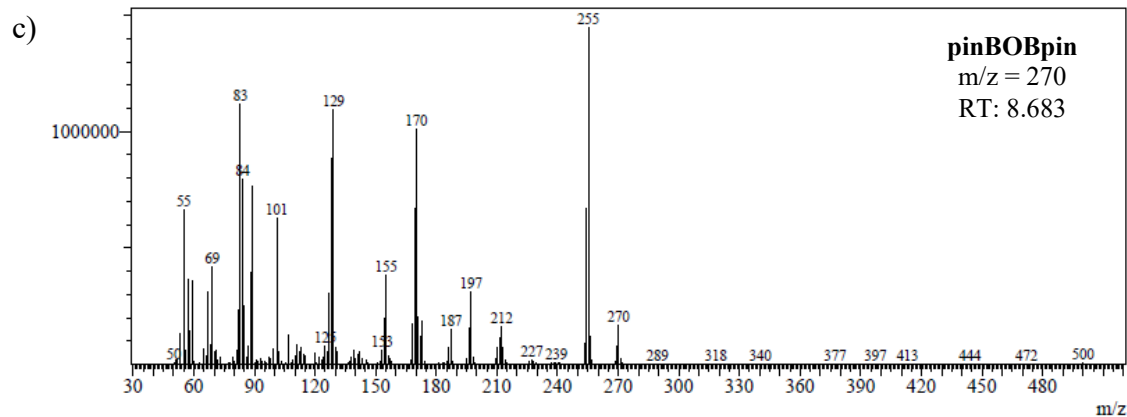

**Figure S11.** GC-MS chromatograms of product **3b** and pinBOBpin.

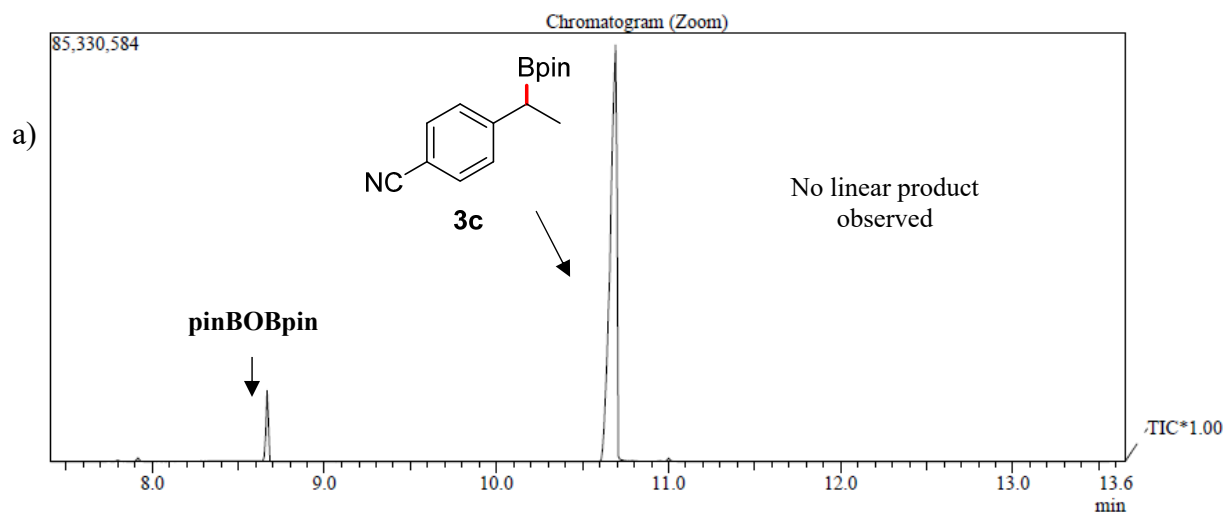

Line#:1 R.Time:10.683(Scan#:1163)  
 MassPeaks:436  
 RawMode:Single 10.683(1163) BasePeak:83.10(8881072)  
 BG Mode:None

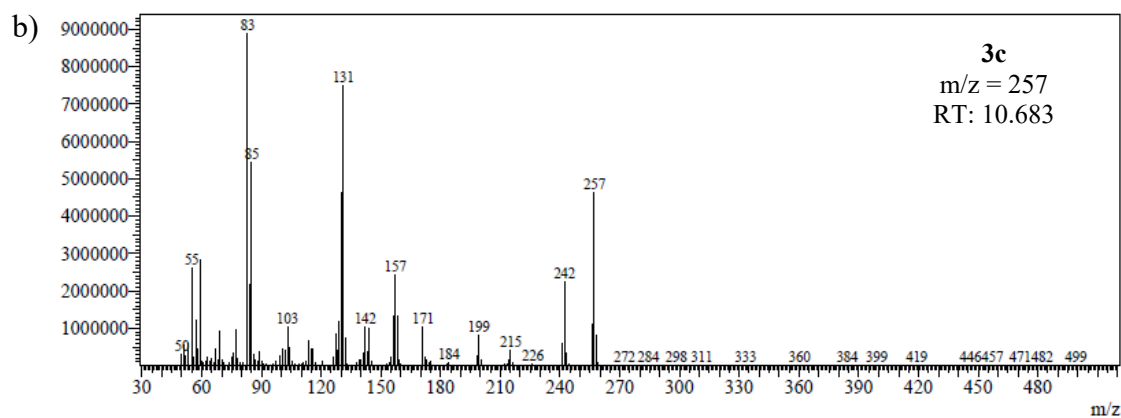

Line#:1 R.Time:8.667(Scan#:921)  
 MassPeaks:438  
 RawMode:Single 8.667(921) BasePeak:255.25(1074646)  
 BG Mode:None

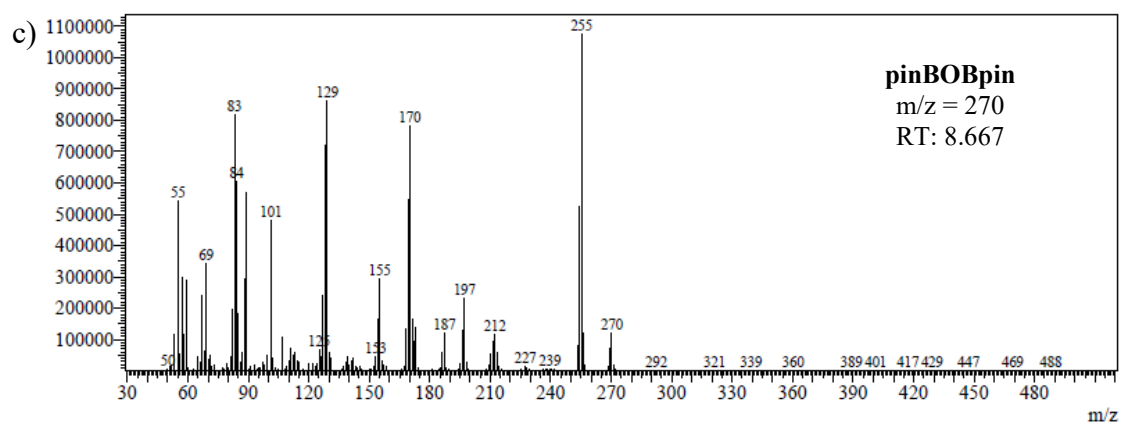

**Figure S12.** GC-MS chromatograms of product **3c** and pinBOBpin.

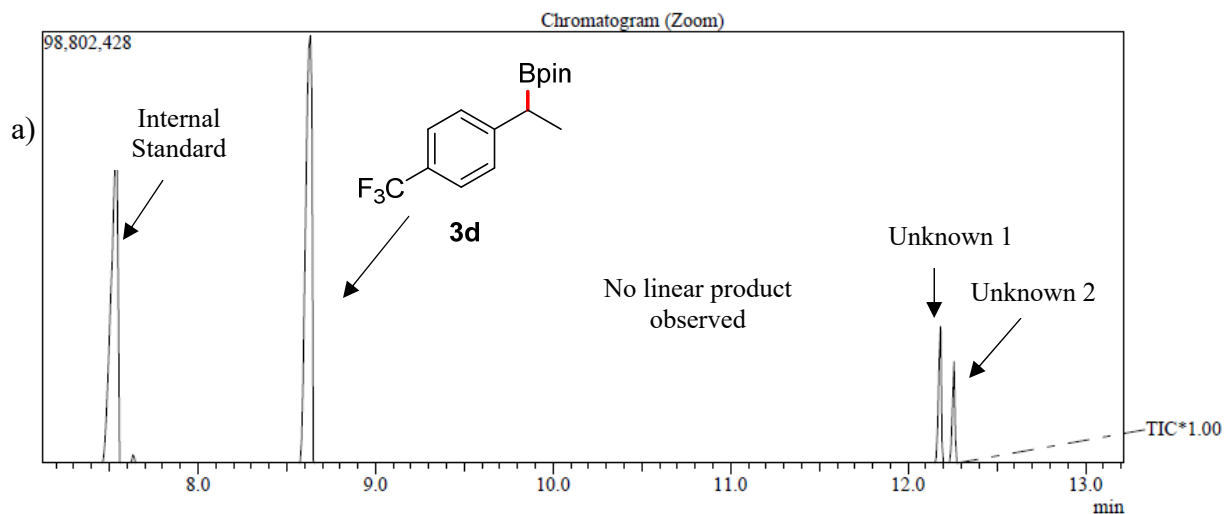

Line#1 R.Time:8.633(Scan#:1036)  
 MassPeaks:413  
 RawMode:Single 8.633(1036) BasePeak:153.95(13998804)  
 BG Mode:None

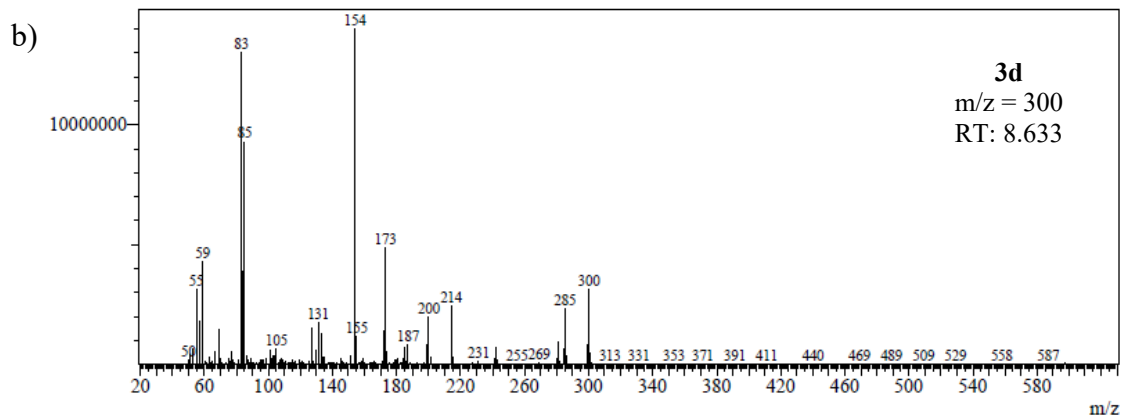

Line#1 R.Time:12.183(Scan#:1462)  
 MassPeaks:448  
 RawMode:Single 12.183(1462) BasePeak:83.05(3770516)  
 BG Mode:None

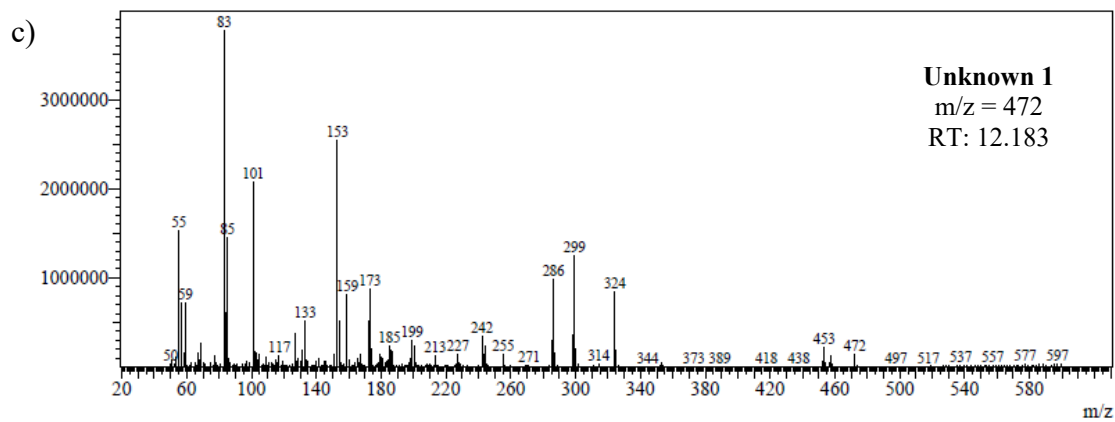

Line#:1 R.Time:12.258(Scan#:1471)  
MassPeaks:446  
RawMode:Single 12.258(1471) BasePeak:83.05(2612904)  
BG Mode:None

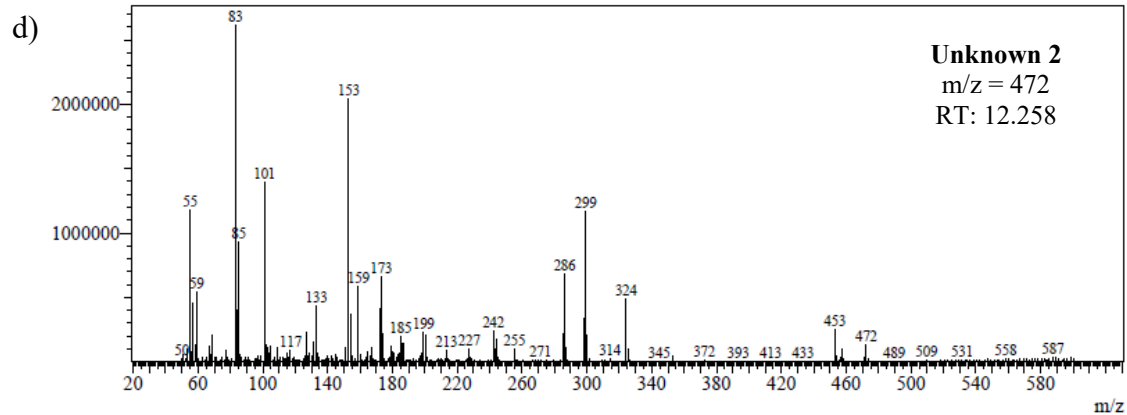

**Figure S13.** GC-MS chromatograms of product **3d** and 2 unknowns.

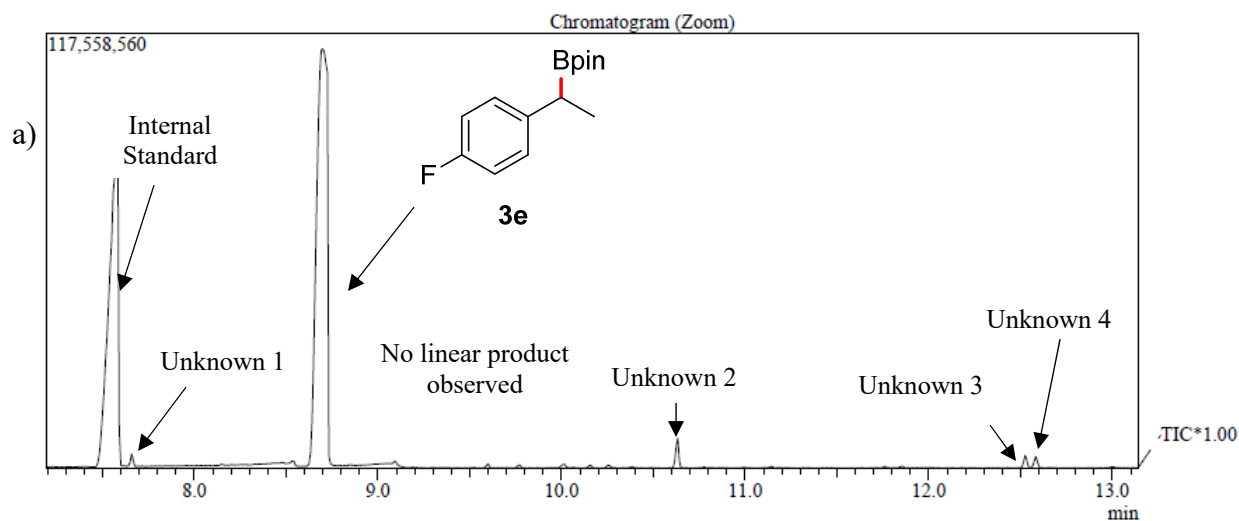

Line#1 R.Time:8.700(Scan#:1044)  
 MassPeaks:411  
 RawMode:Single 8.700(1044) BasePeak:83.05(12792463)  
 BG Mode:None

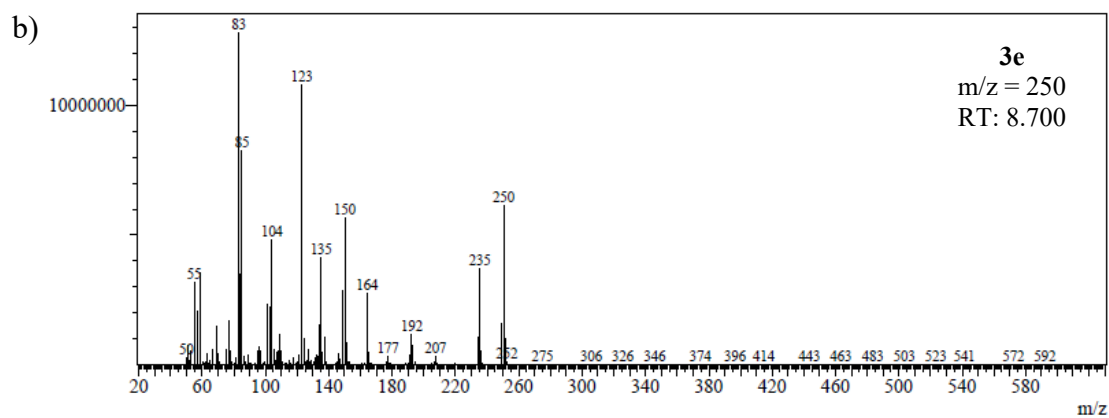

Line#1 R.Time:7.658(Scan#:919)  
 MassPeaks:453  
 RawMode:Single 7.658(919) BasePeak:147.15(638476)  
 BG Mode:None

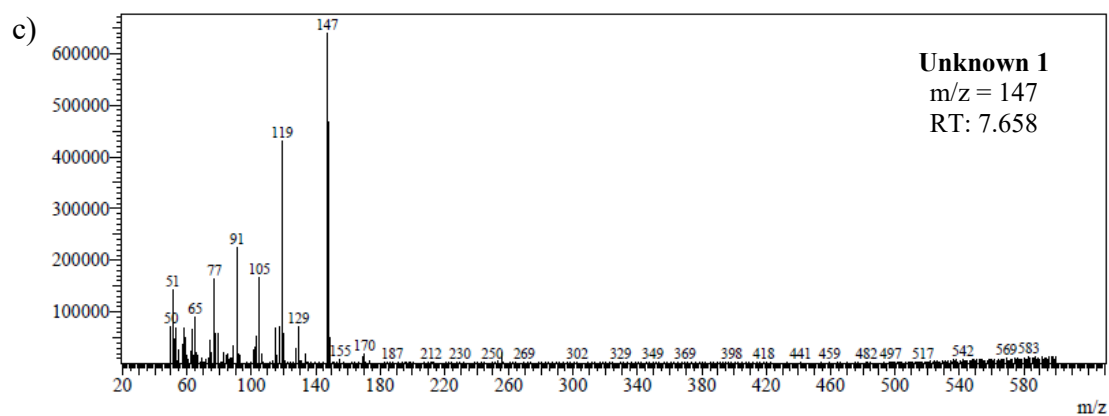

Line#1 R.Time:10.633(Scan#:1276)  
MassPeaks:410  
RawMode:Single 10.633(1276) BasePeak:133.10(1212694)  
BG Mode:None

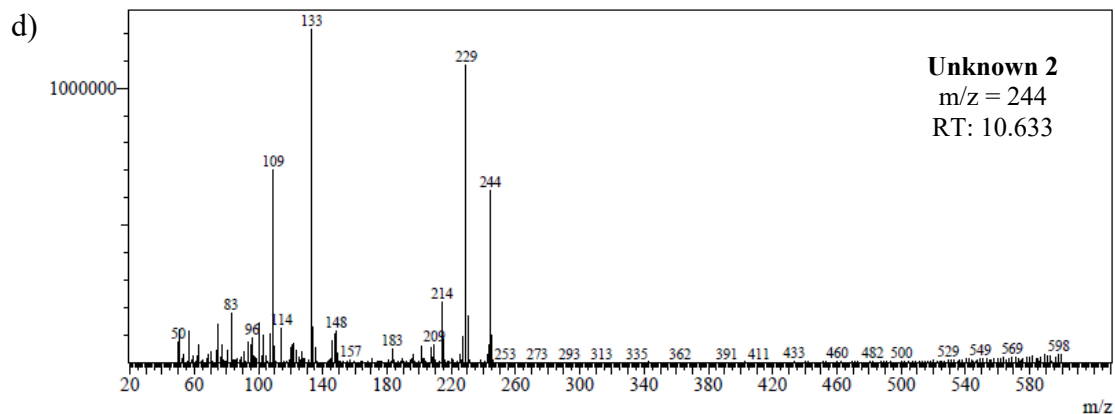

Line#1 R.Time:12.525(Scan#:1503)  
MassPeaks:408  
RawMode:Single 12.525(1503) BasePeak:83.10(288981)  
BG Mode:None

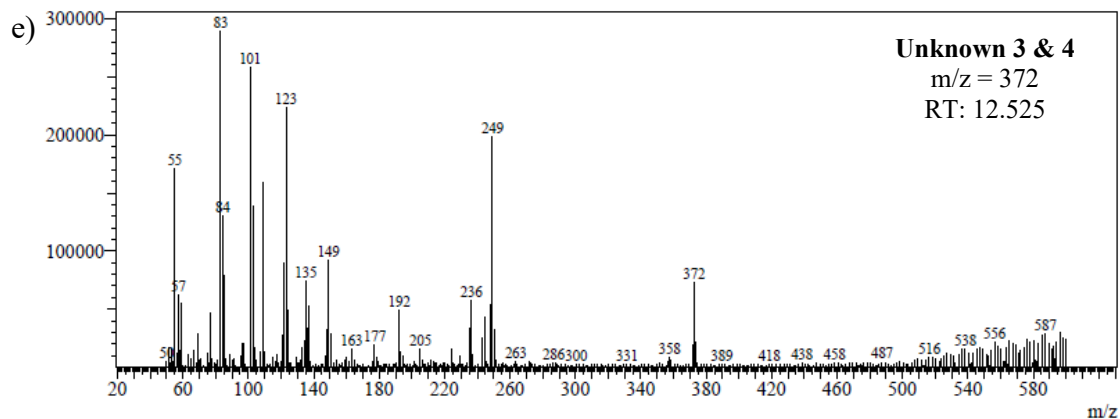

**Figure S14.** GC-MS chromatograms of product **3e** and several unknowns.

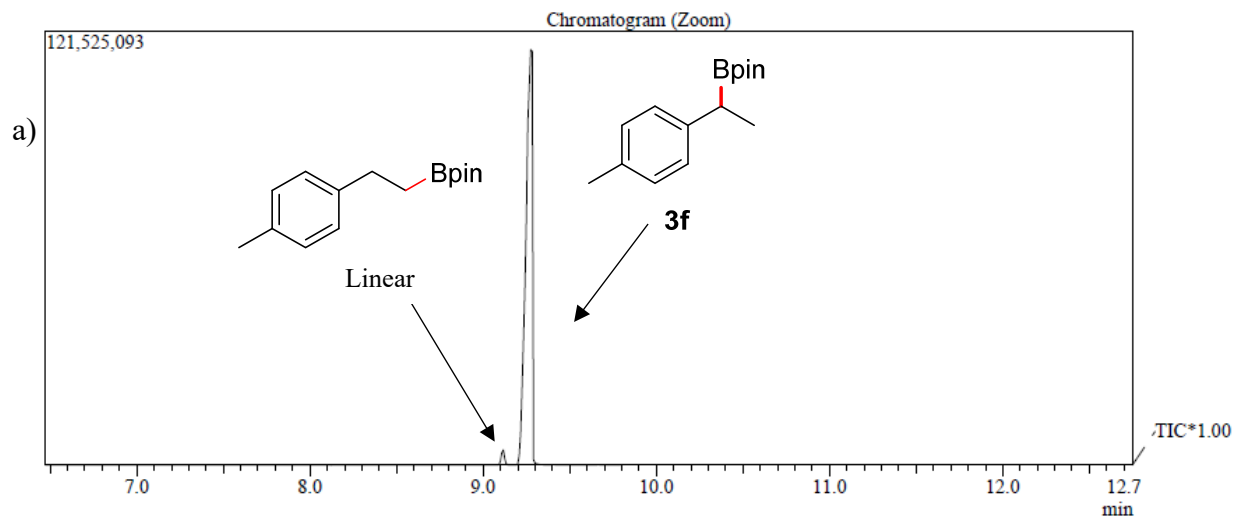

Line#1 R.Time:9.117(Scan#:975)  
 MassPeaks:435  
 RawMode:Single 9.117(975) BasePeak:119.00(582652)  
 BG Mode:None

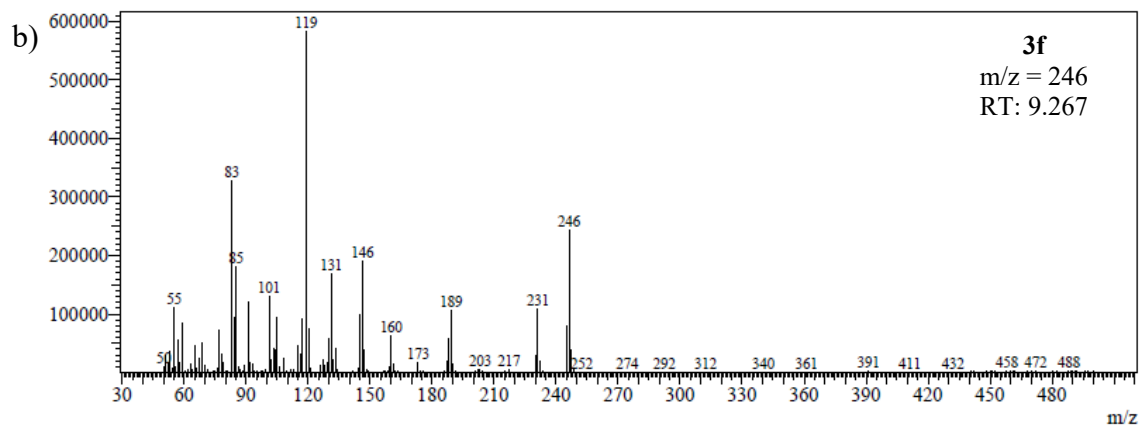

Line#1 R.Time:9.267(Scan#:993)  
 MassPeaks:426  
 RawMode:Single 9.267(993) BasePeak:119.15(11447471)  
 BG Mode:None

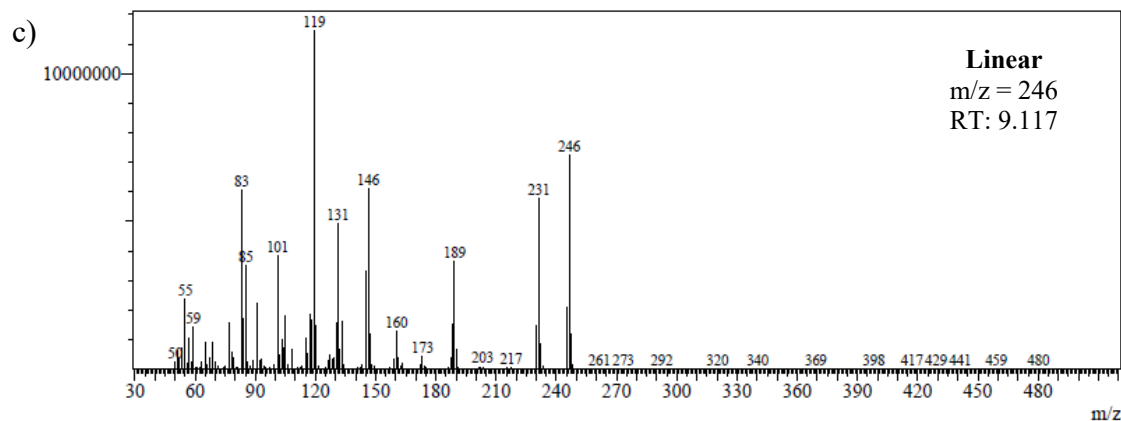

Figure S15. GC-MS chromatograms of product **3f** and linear isomer.



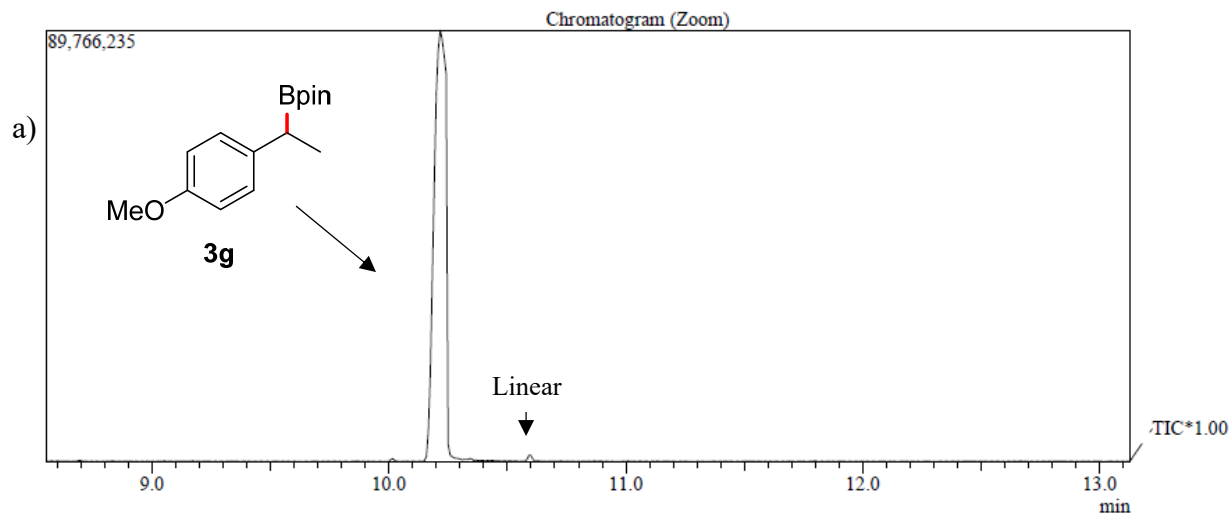

Line#:1 R.Time:10.208(Scan#:1225)  
 MassPeaks:441  
 RawMode:Single 10.208(1225) BasePeak:247.25(15673430)  
 BG Mode:None

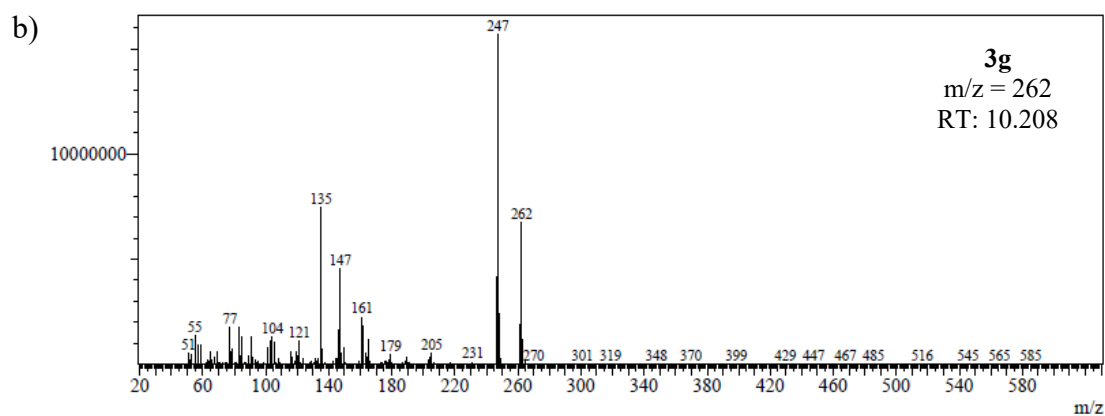

Line#:1 R.Time:10.600(Scan#:1272)  
 MassPeaks:418  
 RawMode:Single 10.600(1272) BasePeak:121.10(269142)  
 BG Mode:None

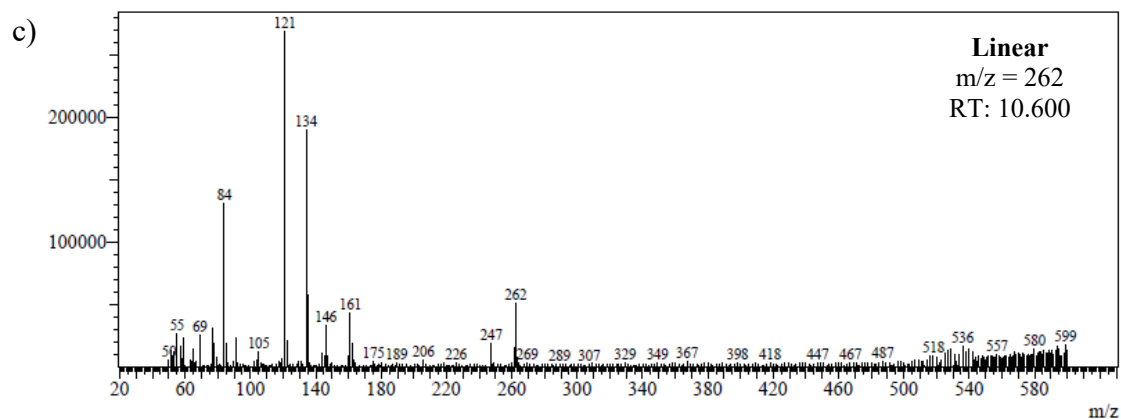

**Figure S16.** GC-MS chromatograms of product **3g** and linear isomer.

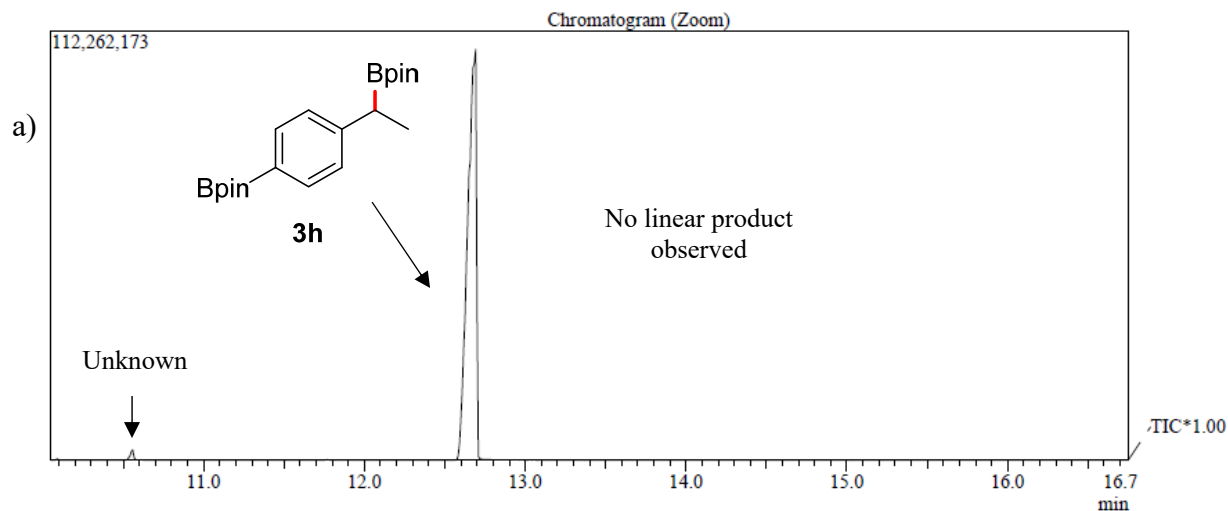

Line#:1 R.Time:12.667(Scan#:1401)  
 MassPeaks:420  
 RawMode:Single 12.667(1401) BasePeak:83.05(16606880)  
 BG Mode:None

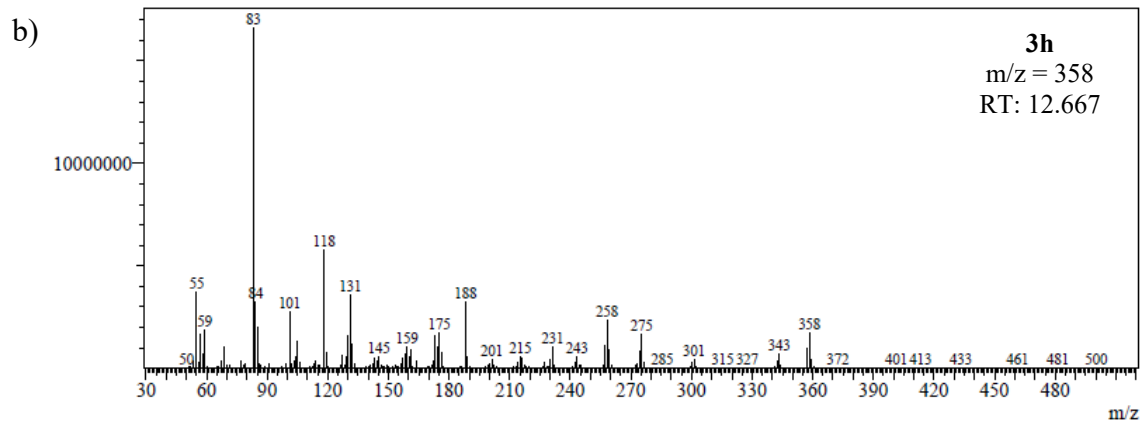

Line#:1 R.Time:10.550(Scan#:1147)  
 MassPeaks:431  
 RawMode:Single 10.550(1147) BasePeak:231.15(380656)  
 BG Mode:None

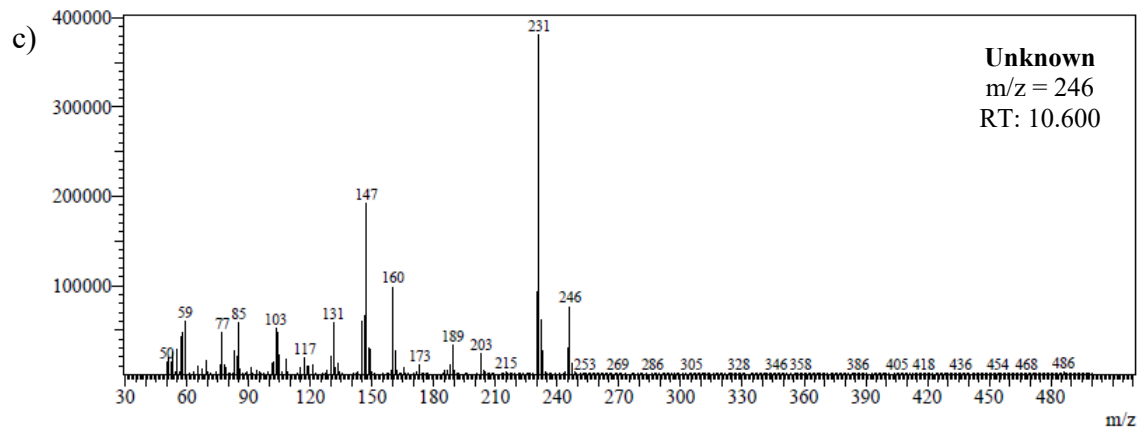

**Figure S17.** GC-MS chromatograms of product **3h** and an unknown.

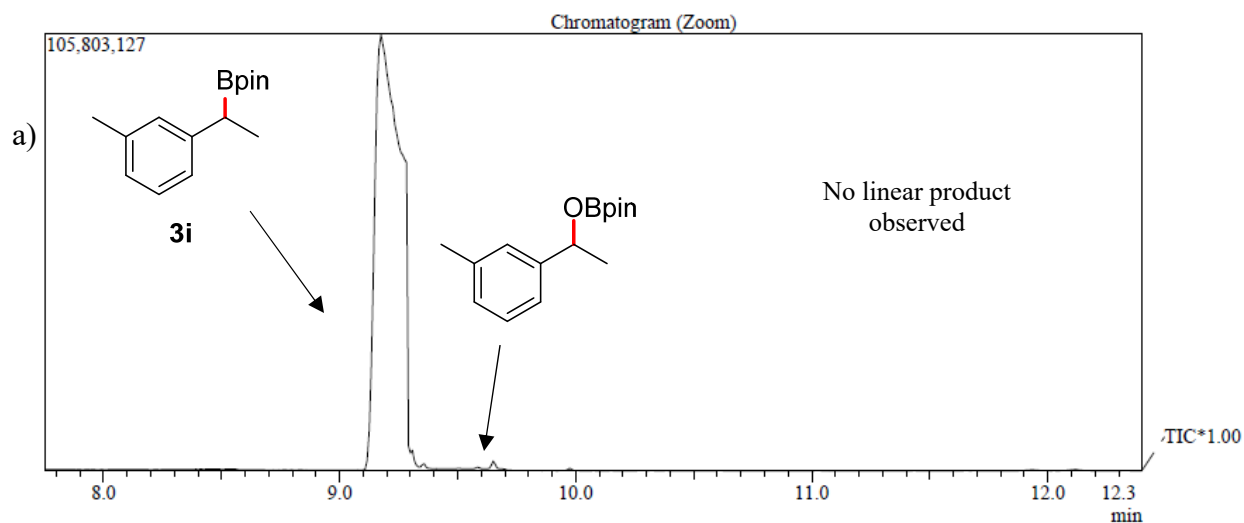

Line#:1 R.Time:9.217(Scan#:1106)  
 MassPeaks:423  
 RawMode:Single 9.217(1106) BasePeak:118.95(10515452)  
 BG Mode:None

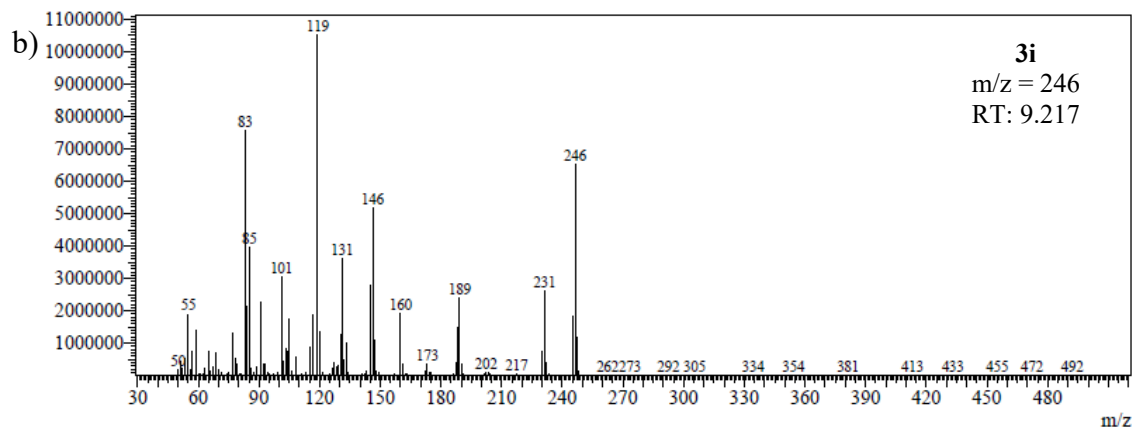

Line#:1 R.Time:9.658(Scan#:1159)  
 MassPeaks:430  
 RawMode:Single 9.658(1159) BasePeak:84.00(316170)  
 BG Mode:None

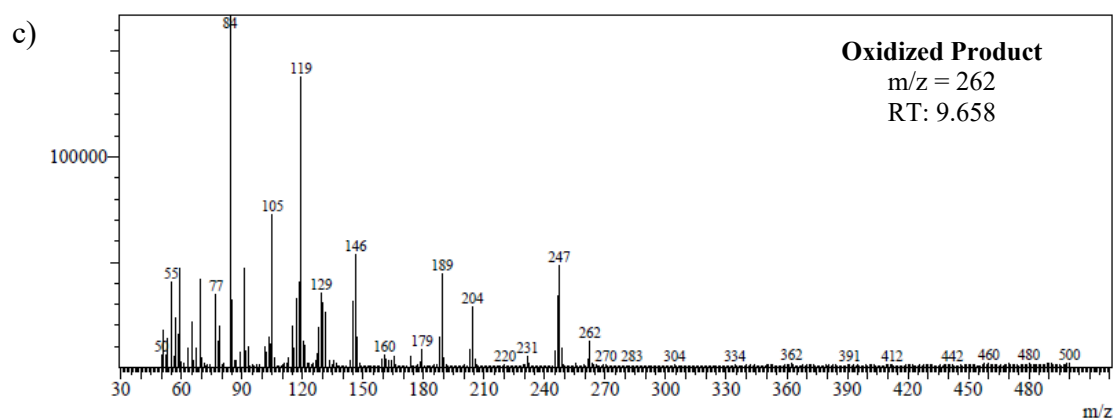

**Figure S18.** GC-MS chromatograms of product **3i** and oxidized product. Assignment of oxidized product is tentative.

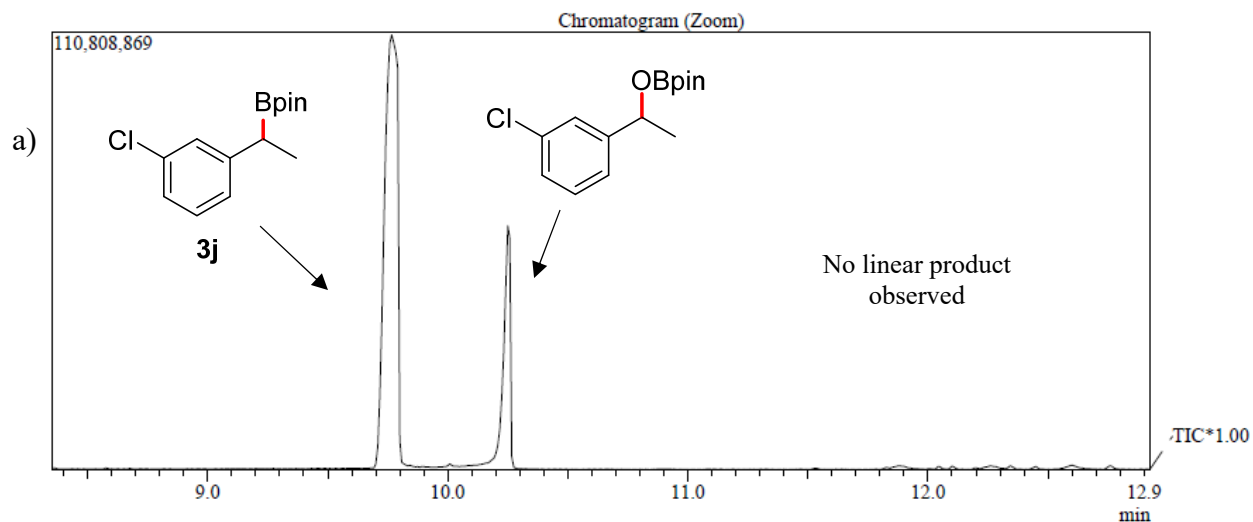

Line#1 R.Time:9.758(Scan#:1171)  
 MassPeaks:417  
 RawMode:Single 9.758(1171) BasePeak:83.05(13964098)  
 BG Mode:None

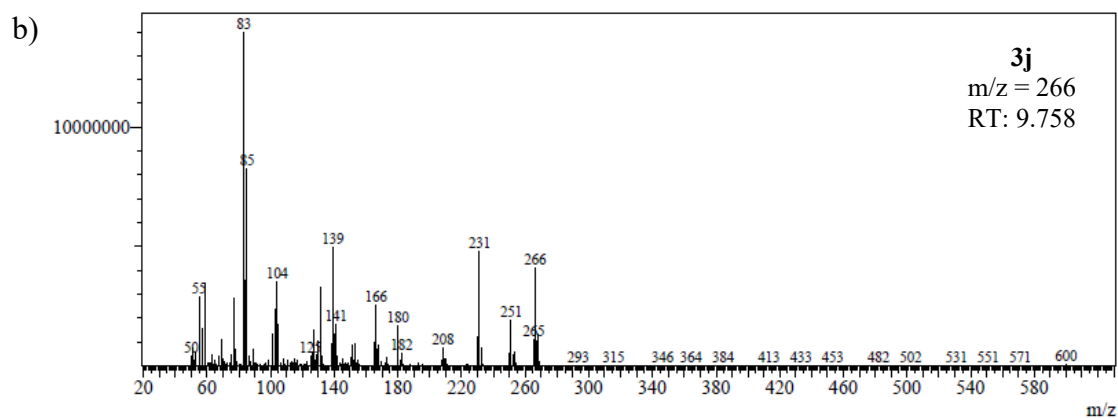

Line#1 R.Time:10.250(Scan#:1230)  
 MassPeaks:421  
 RawMode:Single 10.250(1230) BasePeak:138.95(6382807)  
 BG Mode:None

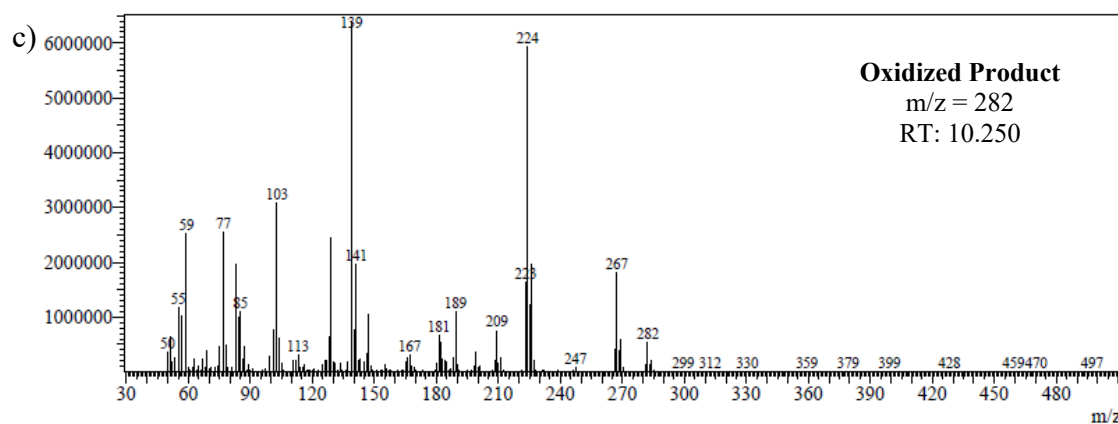

**Figure S19.** GC-MS chromatogram of product **3j** and oxidized product. Assignment of oxidized product is tentative.

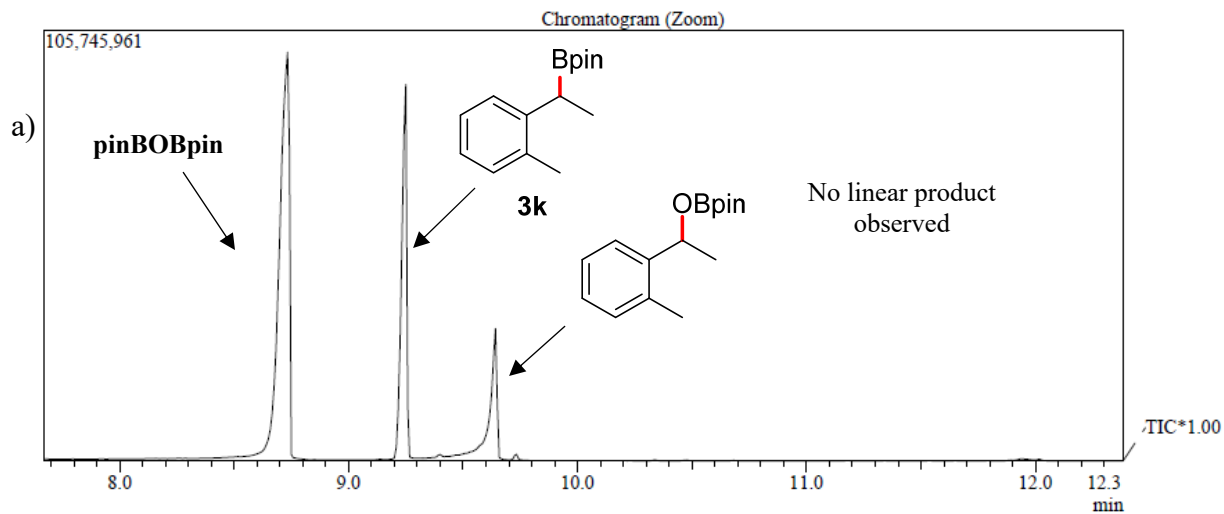

Line#:1 R.Time:9.242(Scan#:1109)  
 MassPeaks:434  
 RawMode:Single 9.242(1109) BasePeak:189.20(5942153)  
 BG Mode:None

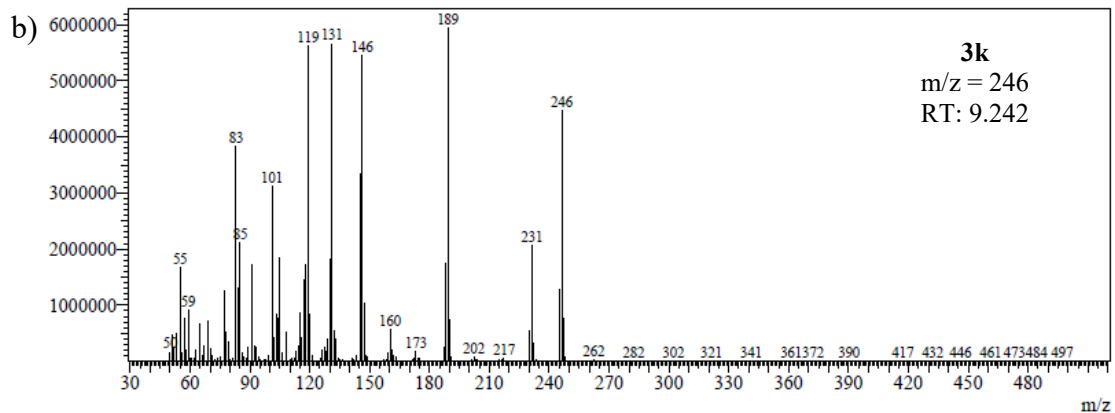

Line#:1 R.Time:8.725(Scan#:1047)  
 MassPeaks:427  
 RawMode:Single 8.725(1047) BasePeak:255.20(6560777)  
 BG Mode:None

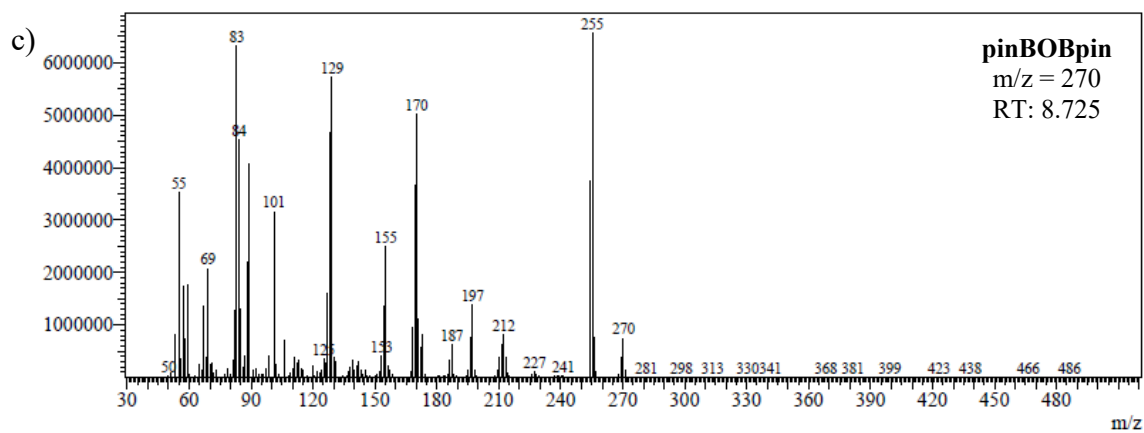

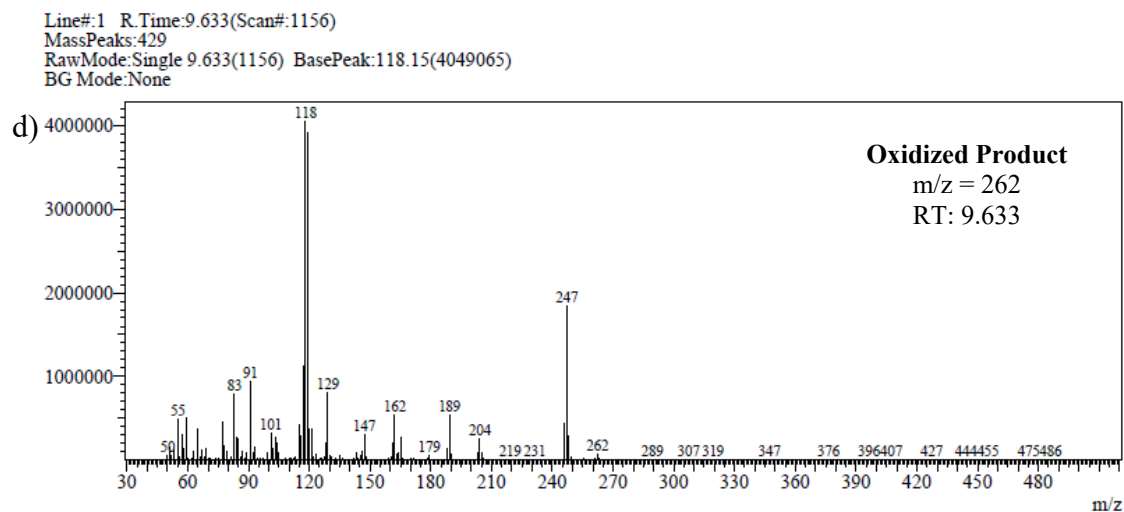

**Figure S20.** GC-MS chromatogram of product **3k**, pinBOBpin, and oxidized product. Assignment of oxidized product is tentative.

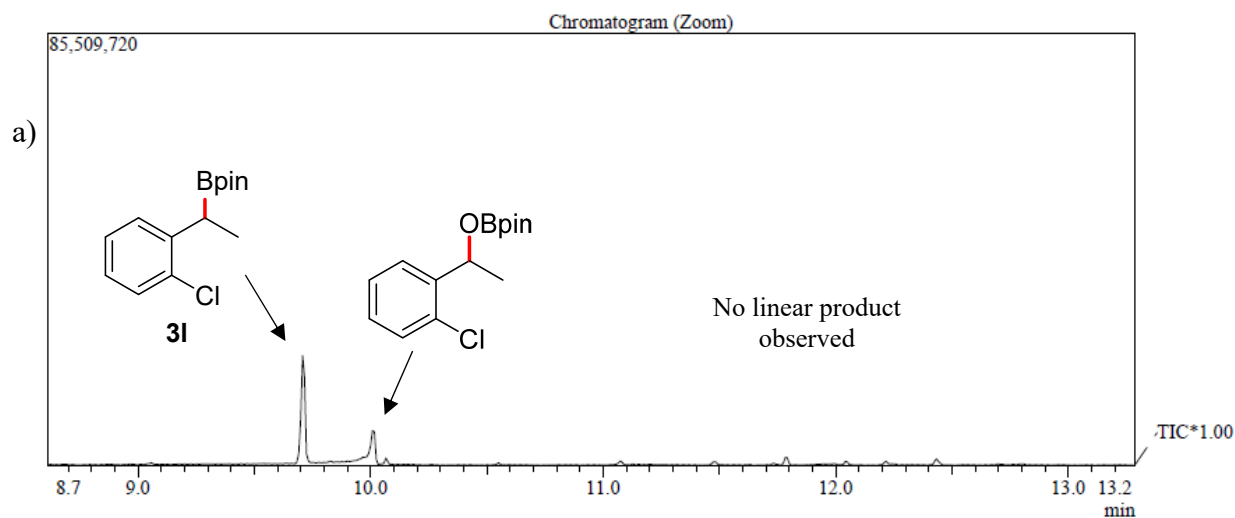

Line#1 R.Time:9.708(Scan#:1165)  
 MassPeaks:431  
 RawMode:Single 9.708(1165) BasePeak:83.05(1979955)  
 BG Mode:None

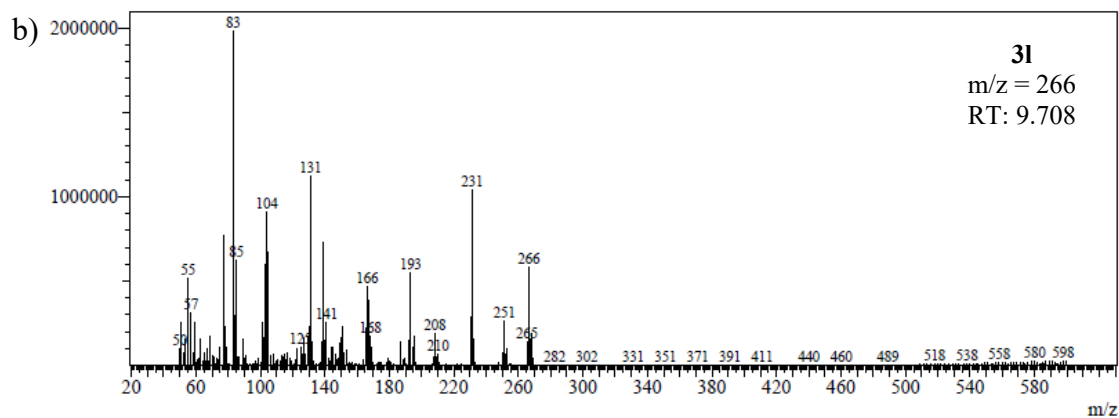

Line#1 R.Time:10.008(Scan#:1201)  
 MassPeaks:476  
 RawMode:Single 10.008(1201) BasePeak:139.00(607436)  
 BG Mode:None

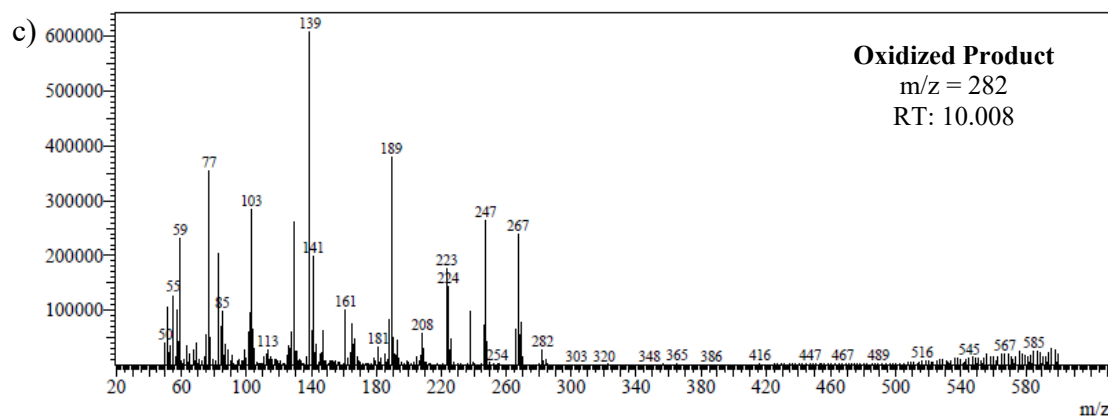

**Figure S21.** GC-MS chromatograms of product **3I** and oxidized product. Assignment of oxidized product is tentative.

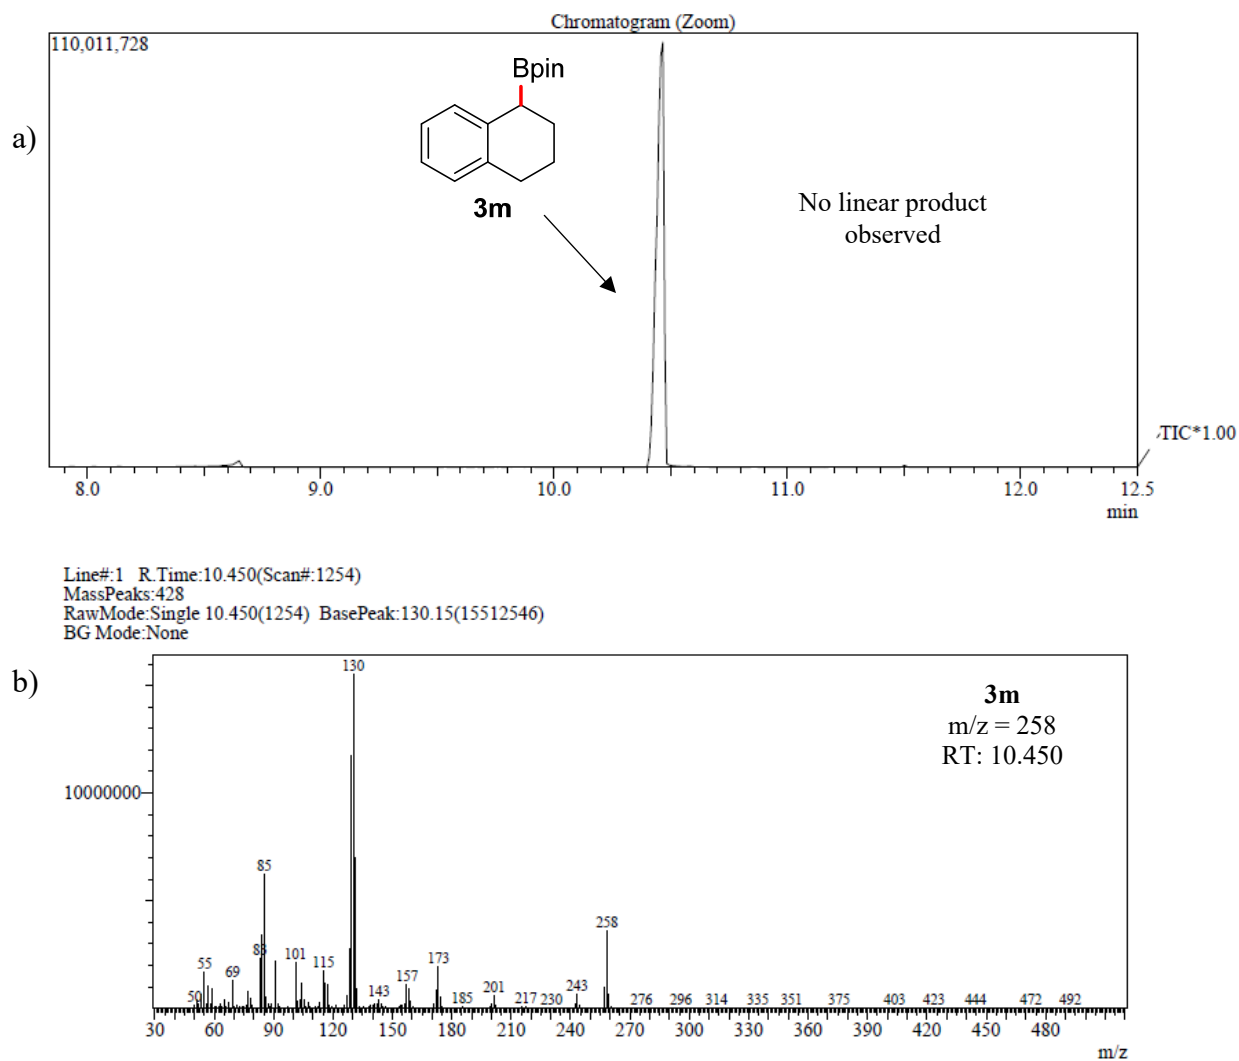

**Figure S22.** GC-MS chromatograms of product **3m**.



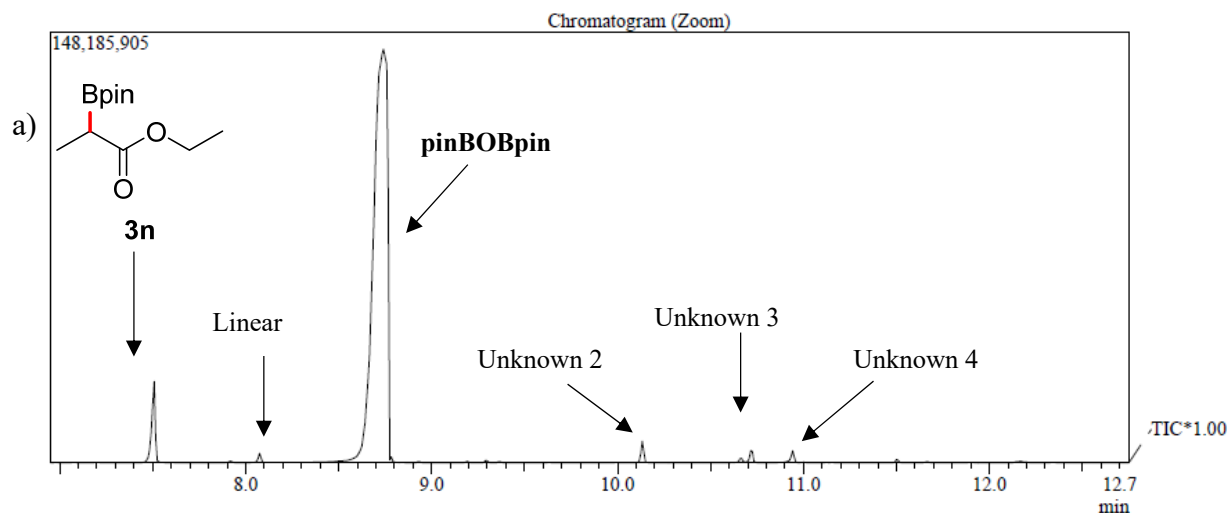

Line#:1 R.Time:7.508(Scan#:782)  
 MassPeaks:437  
 RawMode:Single 7.508(782) BasePeak:55.00(2489137)  
 BG Mode:None

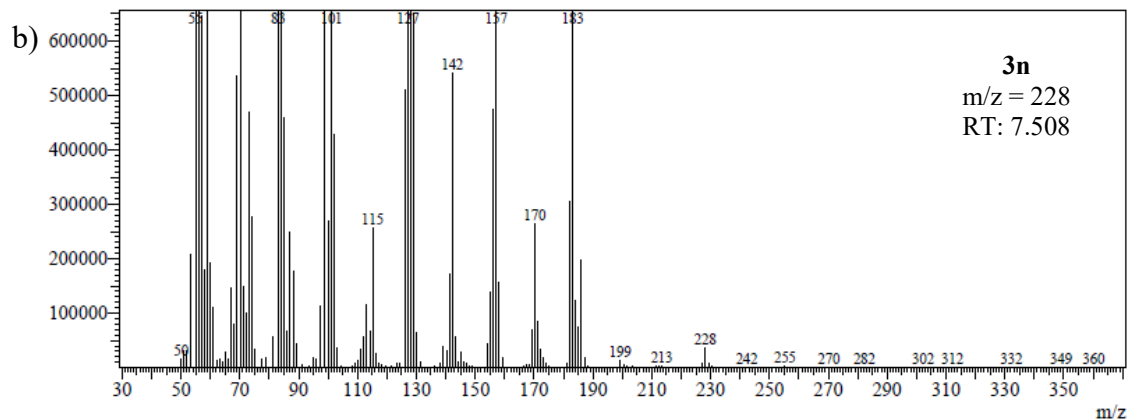

Line#:1 R.Time:7.508(Scan#:782)  
 MassPeaks:437  
 RawMode:Single 7.508(782) BasePeak:55.00(2489137)  
 BG Mode:None

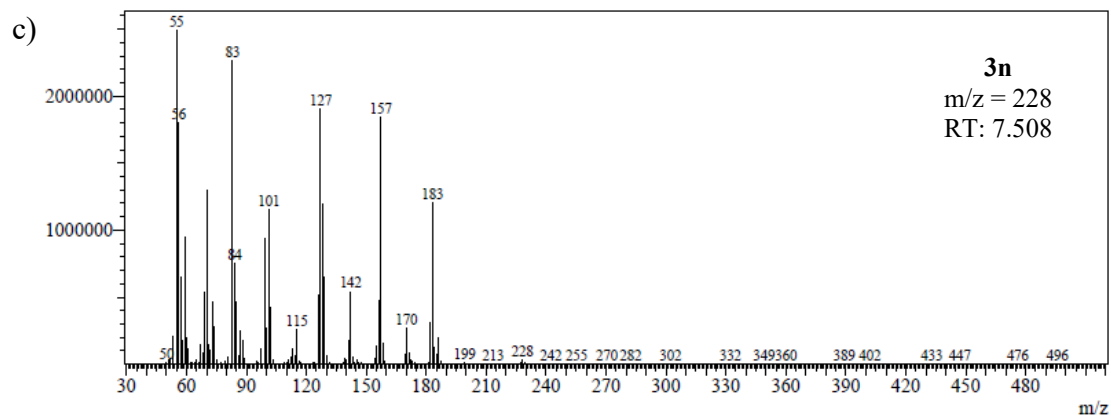

Line#1 R.Time:8.067(Scan#:849)  
MassPeaks:438  
RawMode:Single 8.067(849) BasePeak:171.20(152277)  
BG Mode:None

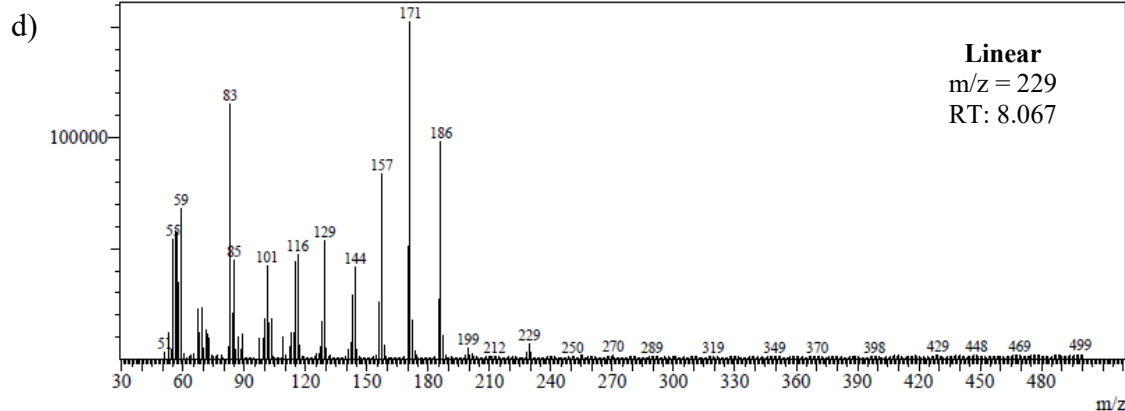

Line#1 R.Time:8.742(Scan#:930)  
MassPeaks:425  
RawMode:Single 8.742(930) BasePeak:255.20(10760149)  
BG Mode:None

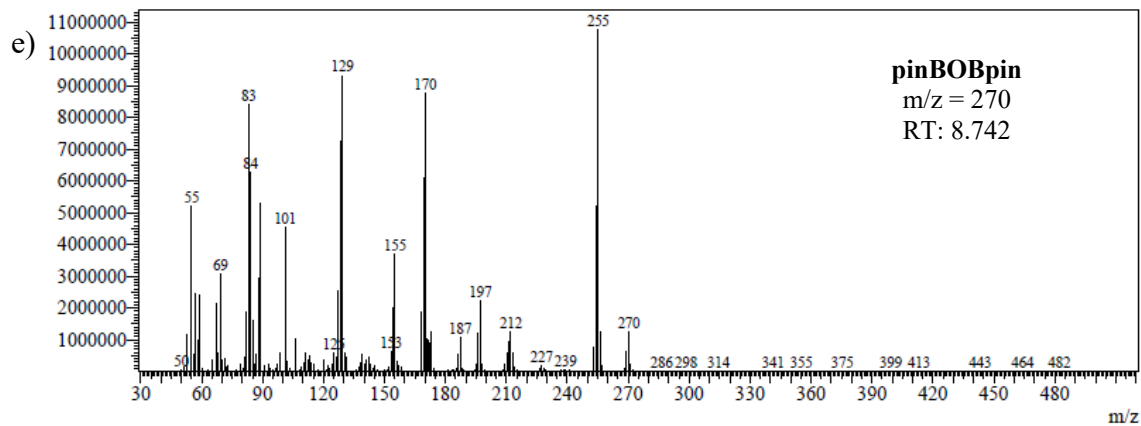

Line#1 R.Time:10.142(Scan#:1098)  
MassPeaks:435  
RawMode:Single 10.142(1098) BasePeak:69.10(436505)  
BG Mode:None

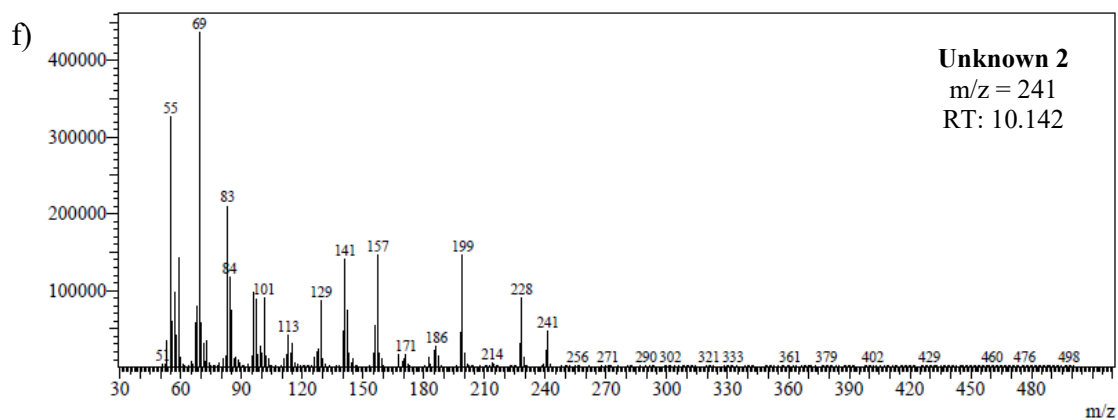

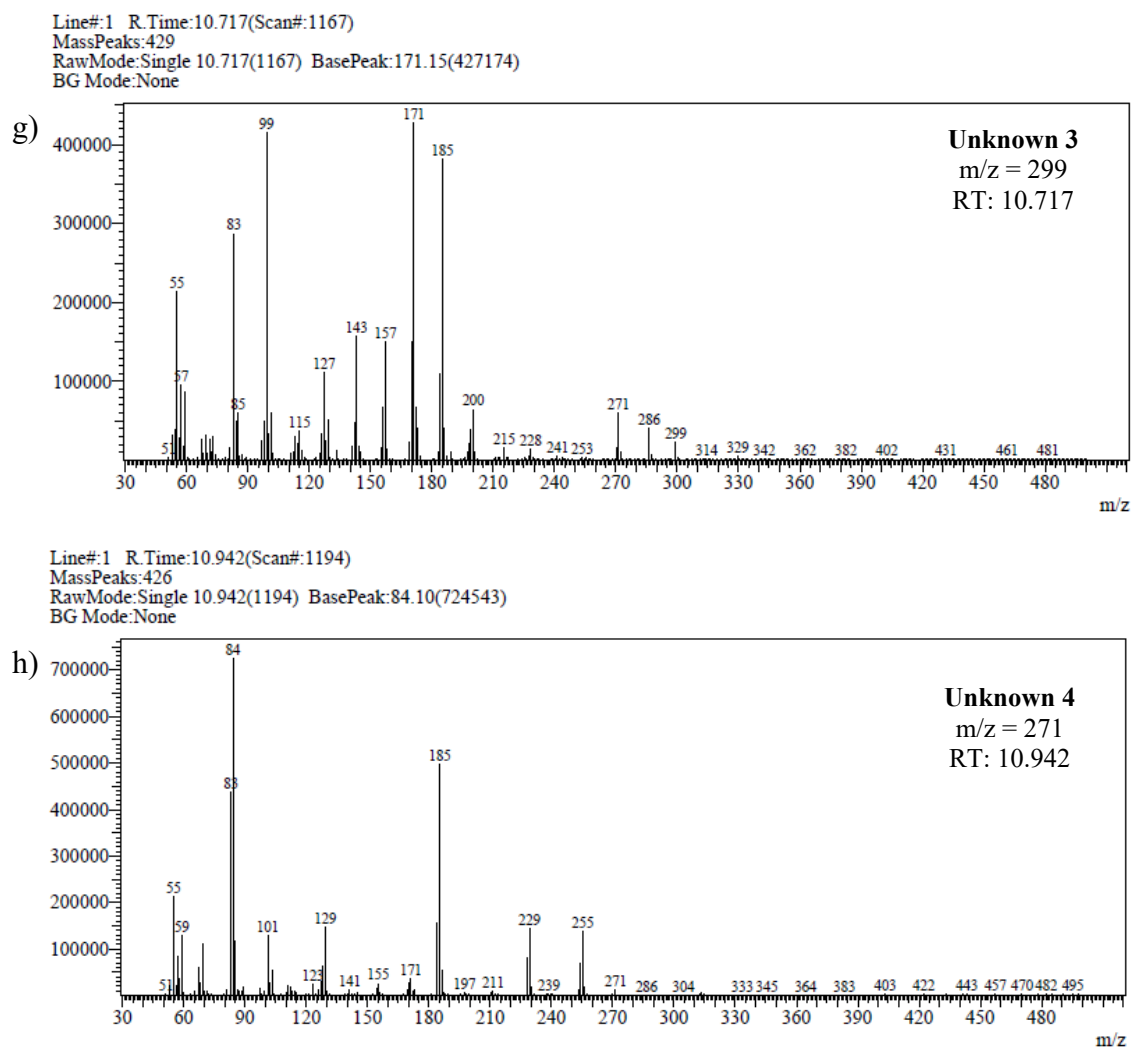

**Figure S23.** GC-MS chromatograms of product **3n**, linear isomer, pinBOBpin, and unknowns.

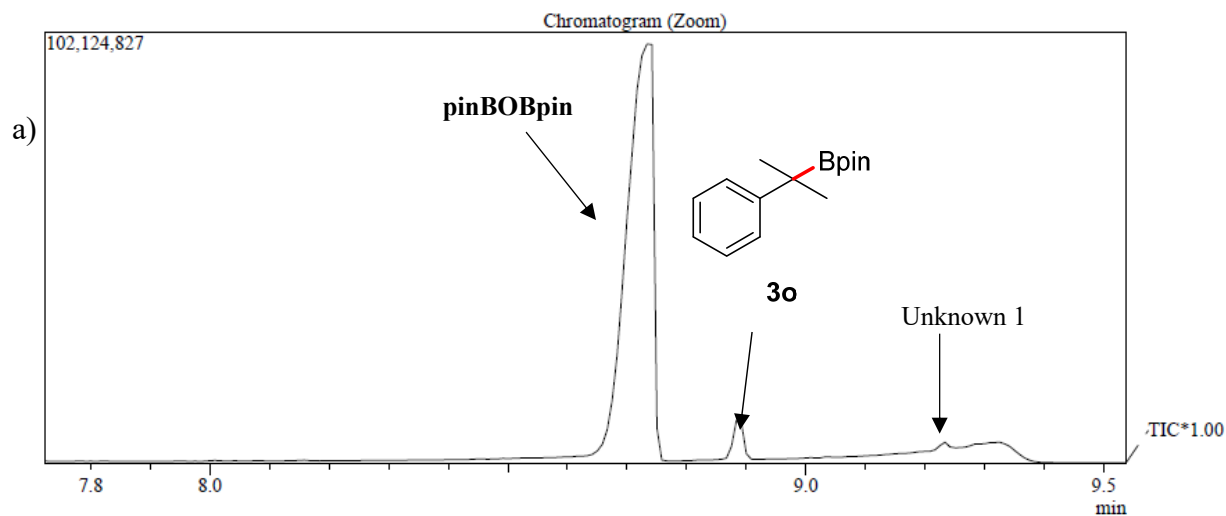

Line#:1 R.Time:8.733(Scan#:1048)  
 MassPeaks:326  
 RawMode:Single 8.733(1048) BasePeak:83.10(7360378)  
 BG Mode:Averaged 8.150-8.650(978-1038)

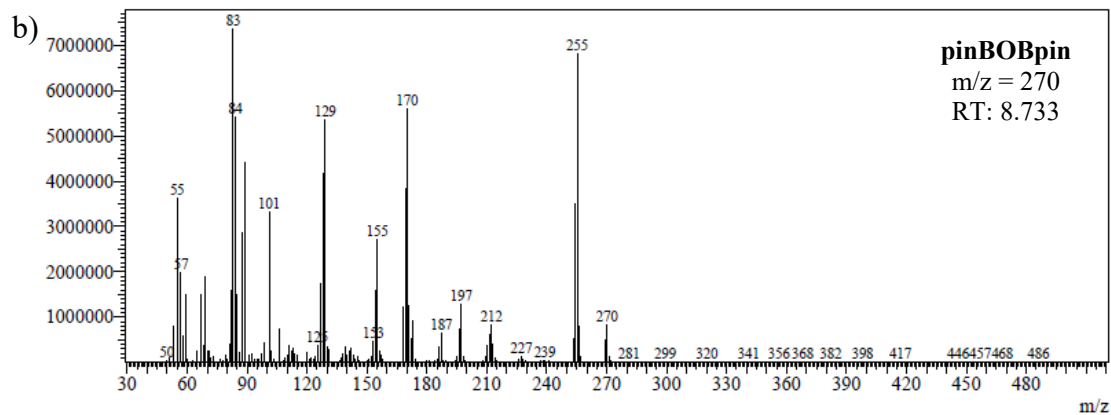

Line#:1 R.Time:8.892(Scan#:1067)  
 MassPeaks:429  
 RawMode:Single 8.892(1067) BasePeak:83.05(543948)  
 BG Mode:None

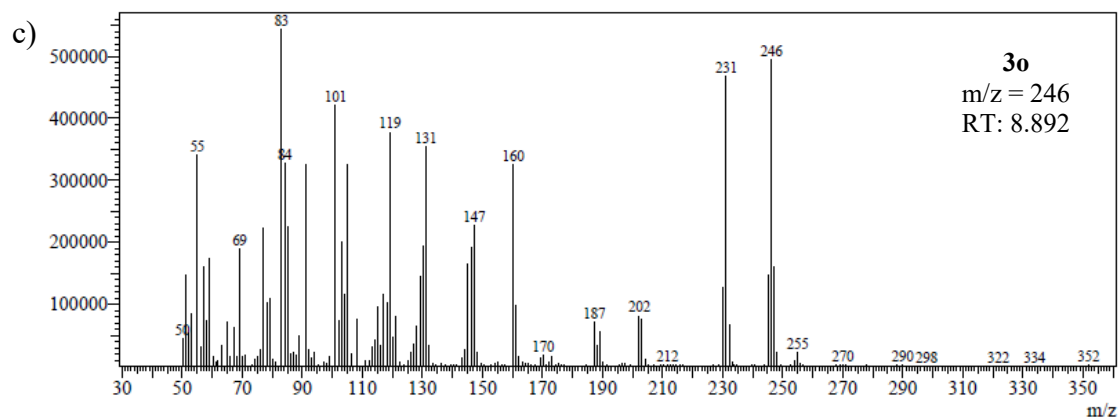

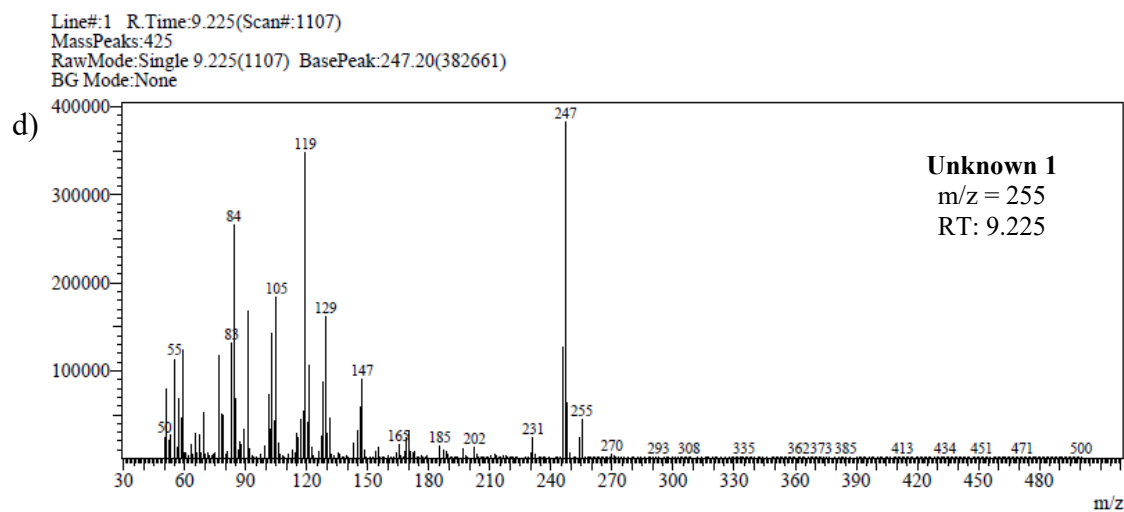

**Figure S24.** GC-MS chromatograms of product **3o**, pinBOBpin, and an unknown.

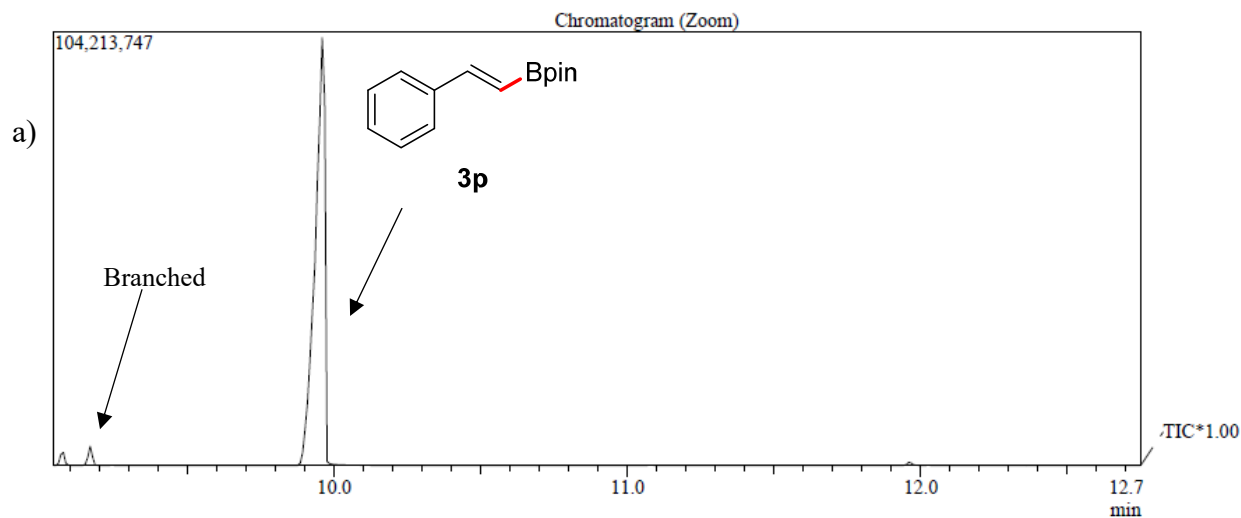

Line#:1 R.Time:9.950(Scan#:1075)  
 MassPeaks:429  
 RawMode:Single 9.950(1075) BasePeak:129.05(10247794)  
 BG Mode:None

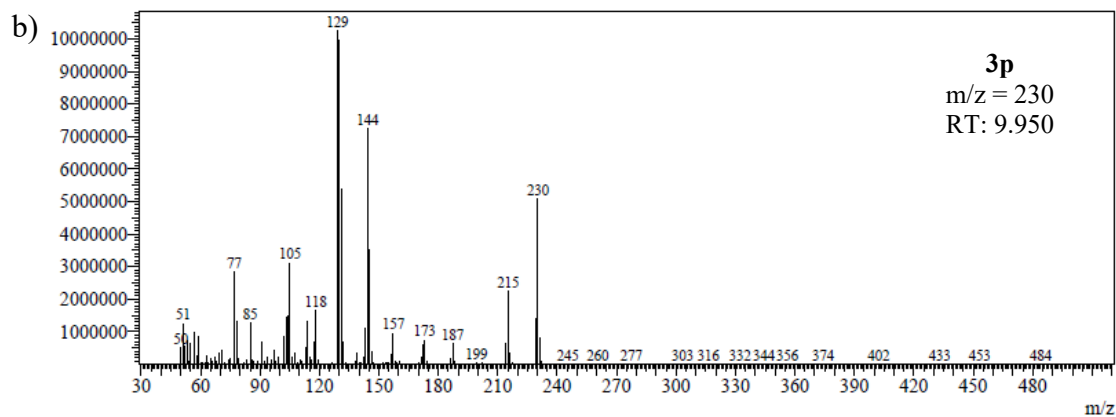

Line#:1 R.Time:9.167(Scan#:981)  
 MassPeaks:435  
 RawMode:Single 9.167(981) BasePeak:129.15(450981)  
 BG Mode:None

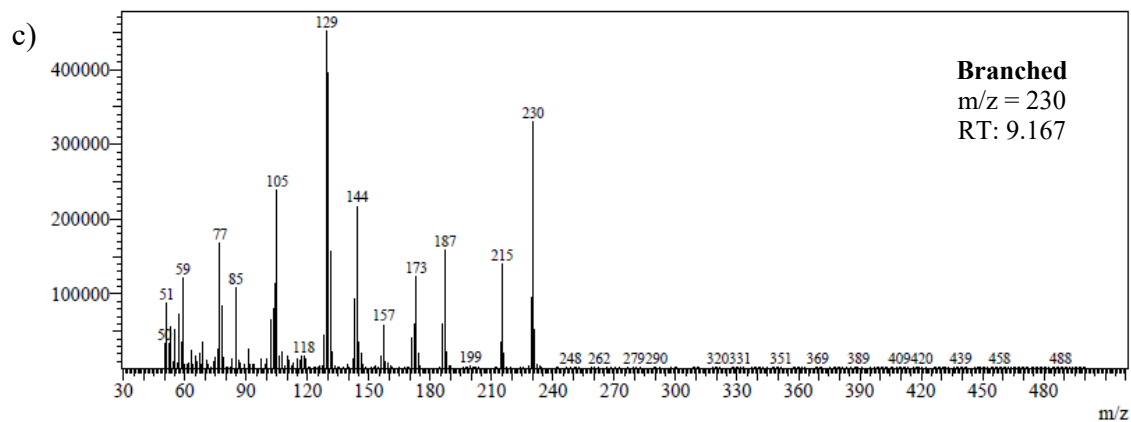

Figure S25. GC-MS chromatograms of product **3p** and branched isomer.

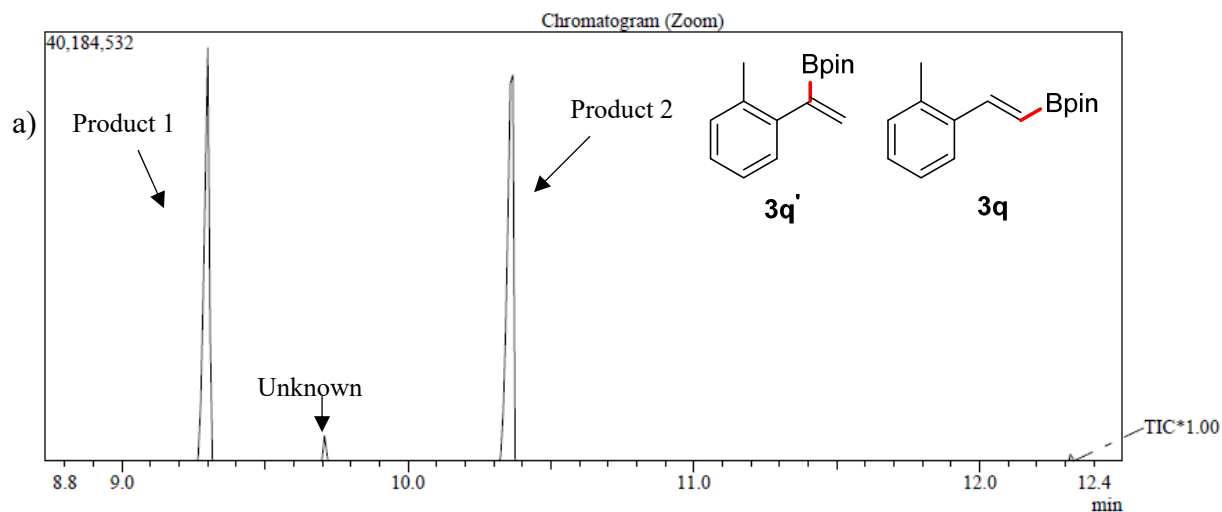

Line#1 R.Time:9.292(Scan#:996)  
 MassPeaks:433  
 RawMode:Single 9.292(996) BasePeak:144.15(4411612)  
 BG Mode:None

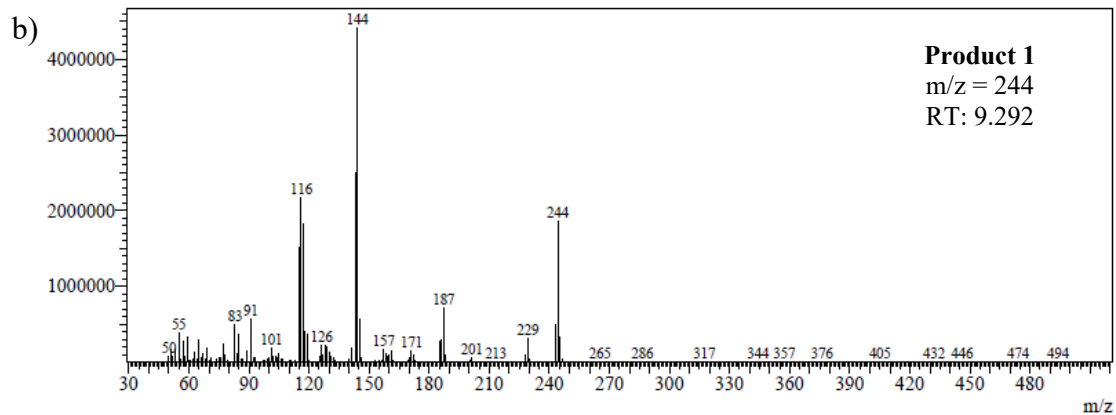

Line#1 R.Time:9.708(Scan#:1046)  
 MassPeaks:437  
 RawMode:Single 9.708(1046) BasePeak:84.00(522551)  
 BG Mode:None

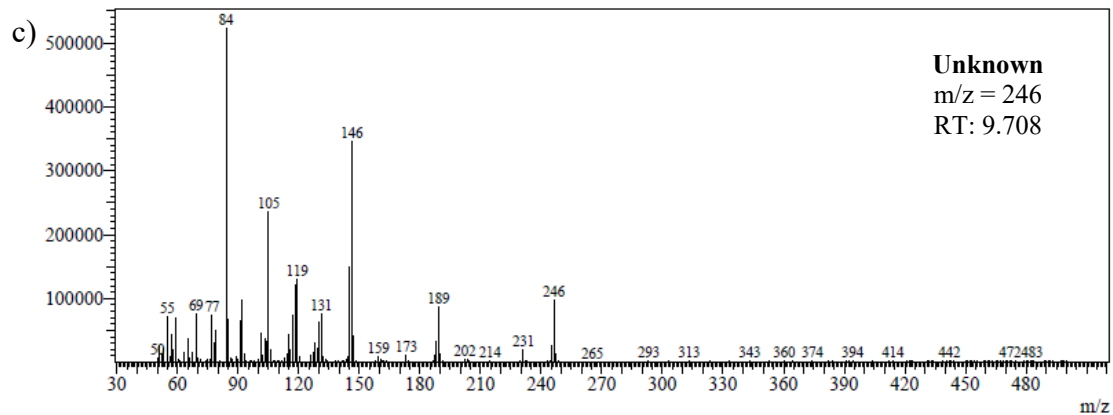

Line#:1 R.Time:10.358(Scan#:1124)  
MassPeaks:435  
RawMode:Single 10.358(1124) BasePeak:144.15(5498231)  
BG Mode:None

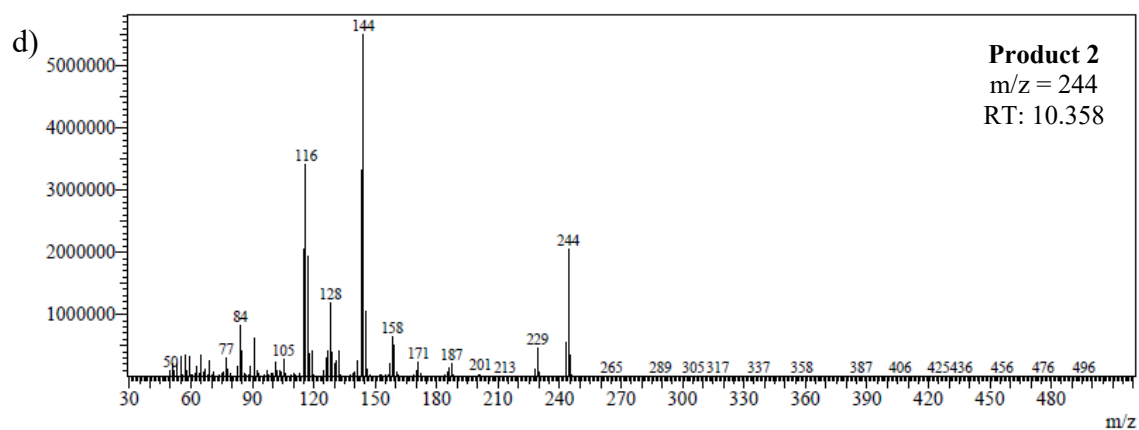

**Figure S26.** GC-MS chromatograms of product **3q**, **3q'**, an isomer, and an unknown.



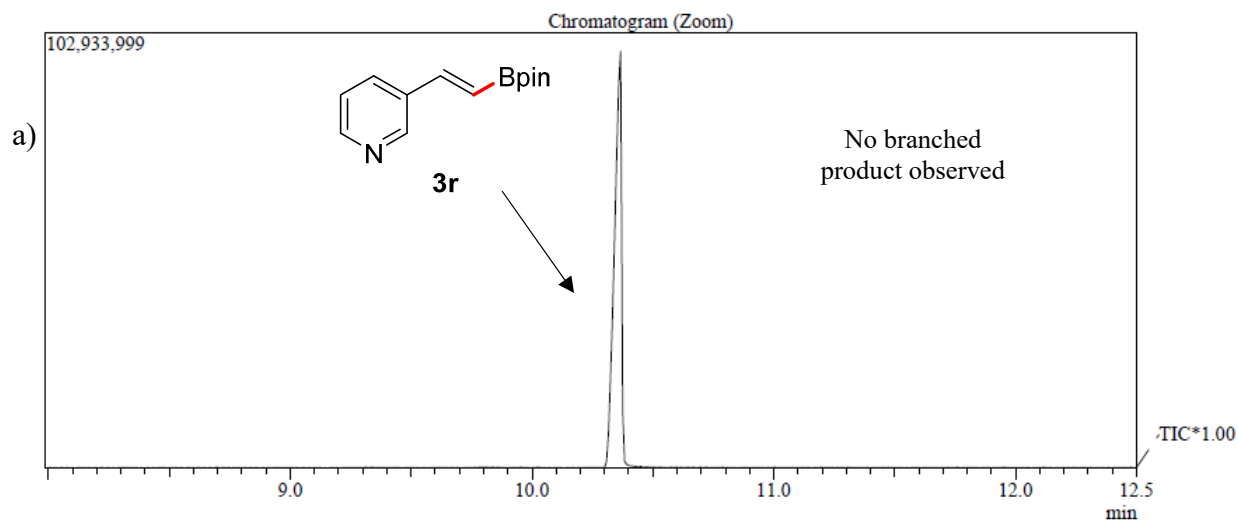

Line#:1 R.Time:10.358(Scan#:1243)  
 MassPeaks:424  
 RawMode:Single 10.358(1243) BasePeak:132.10(9820971)  
 BG Mode:None

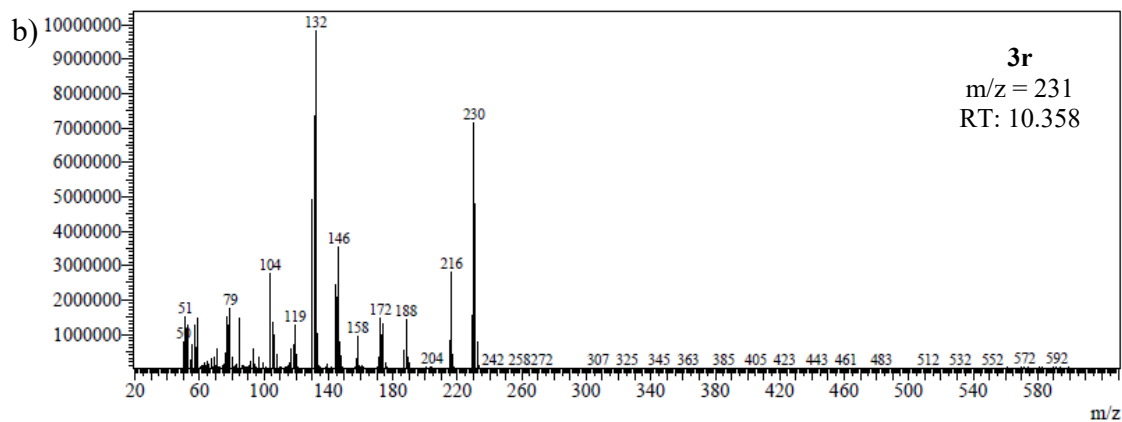

**Figure S27.** GC-MS chromatograms of product **3r**.

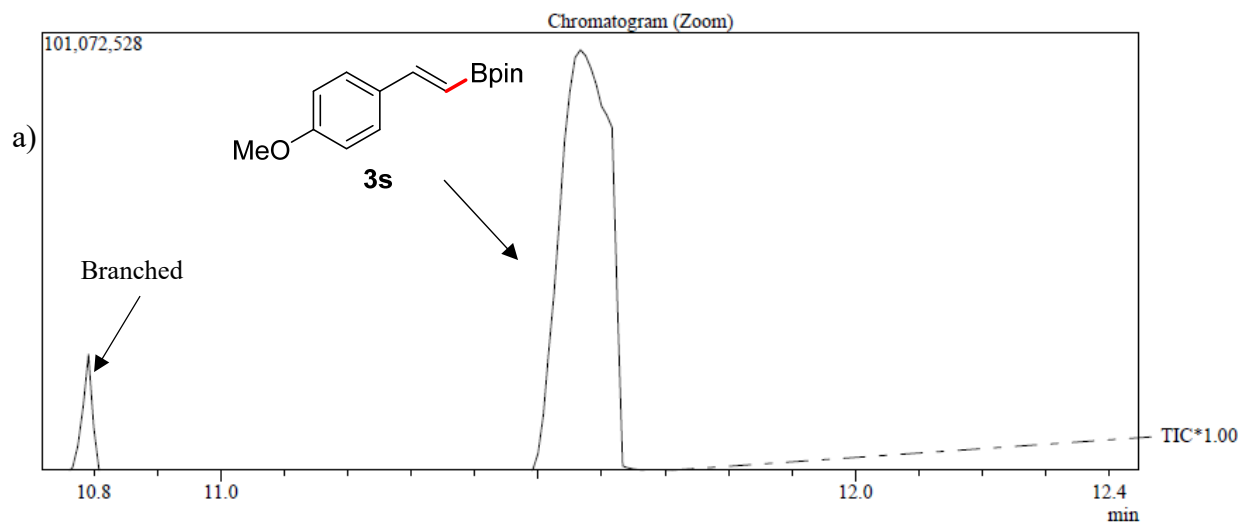

Line#1 R.Time:11.575(Scan#:1389)  
 MassPeaks:430  
 RawMode:Single 11.575(1389) BasePeak:144.15(10527417)  
 BG Mode:None

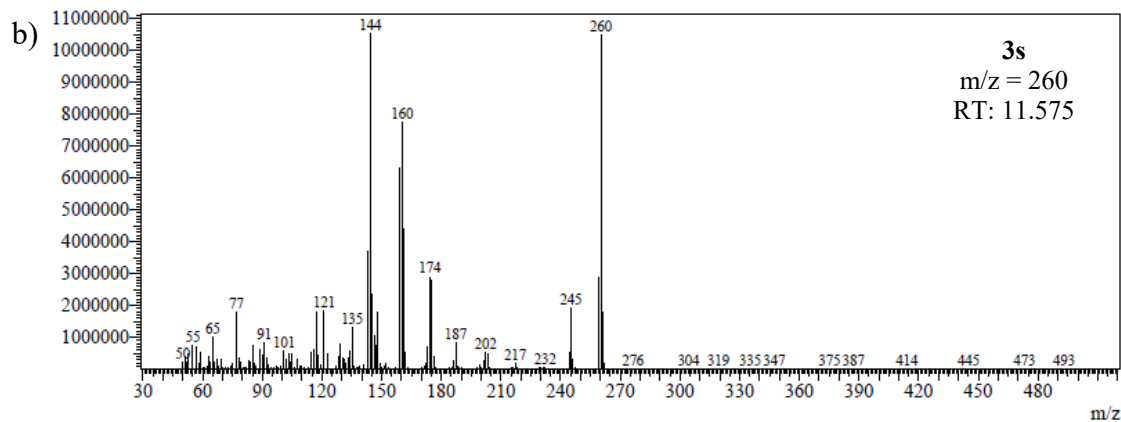

Line#1 R.Time:10.792(Scan#:1295)  
 MassPeaks:433  
 RawMode:Single 10.792(1295) BasePeak:260.20(4005936)  
 BG Mode:None

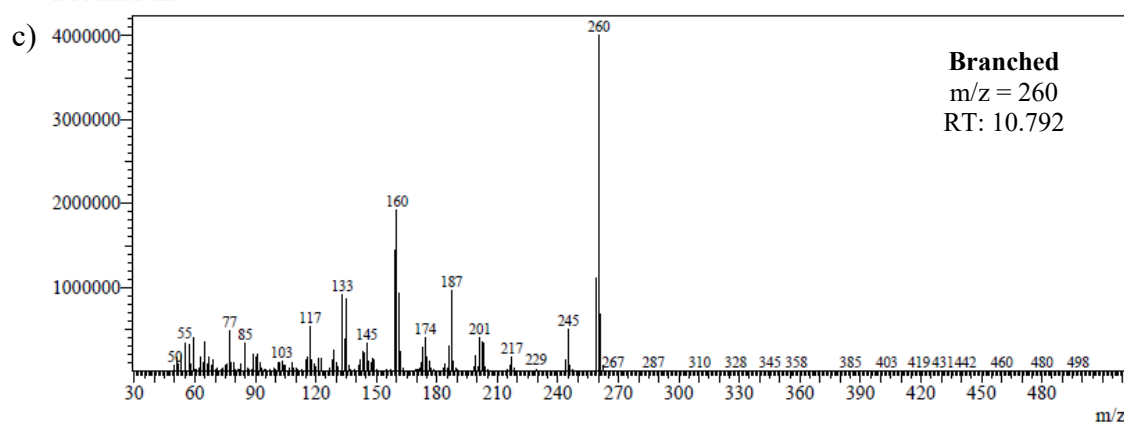

Figure S28. GC-MS chromatograms of product **3s** and an isomer.

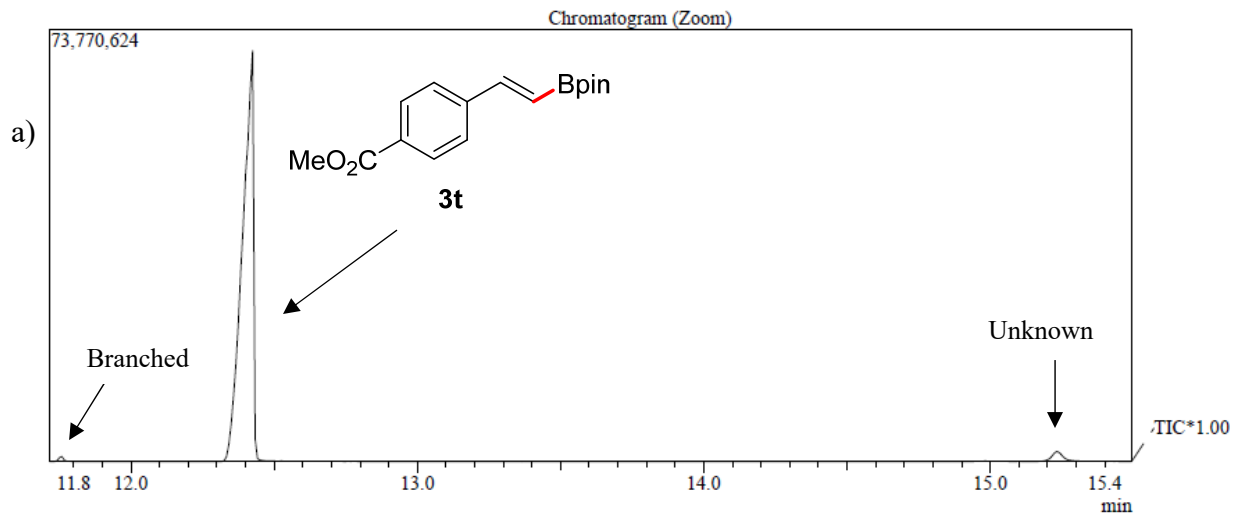

Line#1 R.Time:12.425(Scan#:1372)  
 MassPeaks:429  
 RawMode:Single 12.425(1372) BasePeak:157.10(6212676)  
 BG Mode:None

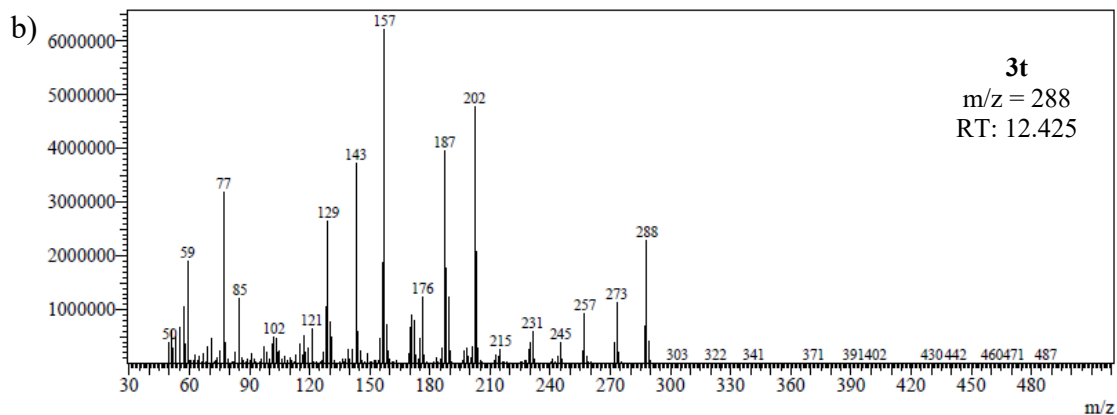

Line#1 R.Time:11.750(Scan#:1291)  
 MassPeaks:432  
 RawMode:Single 11.750(1291) BasePeak:157.15(52128)  
 BG Mode:None

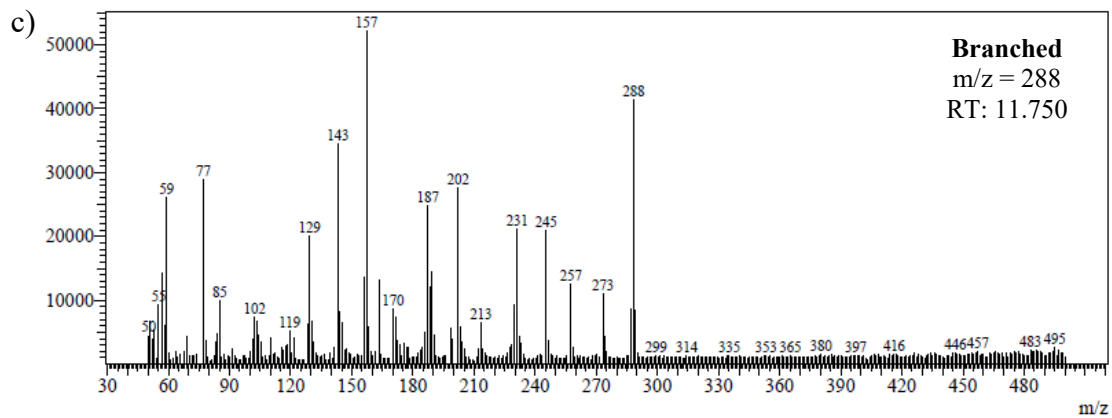

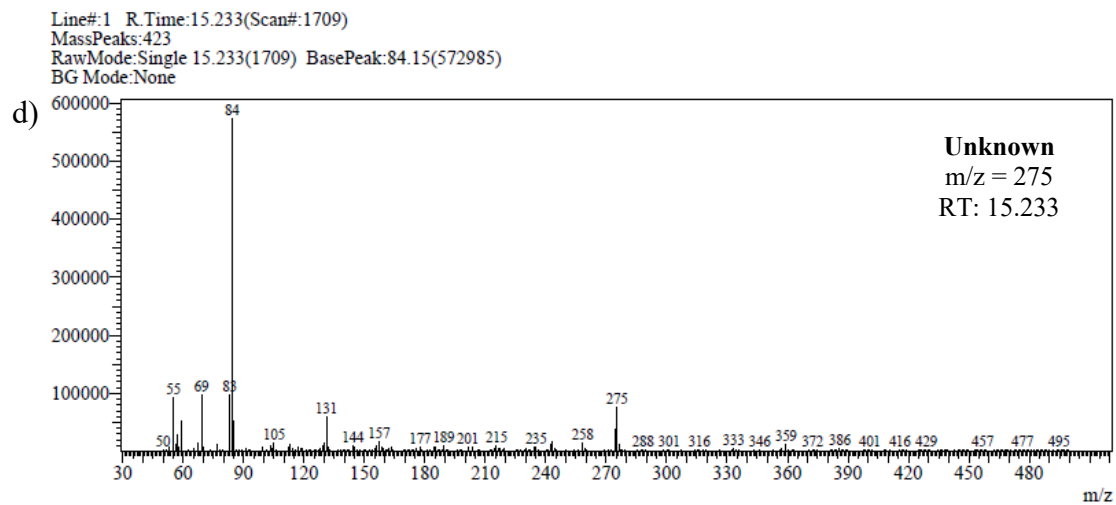

**Figure S29.** GC-MS chromatogram of product **3t**, isomer, and unknown

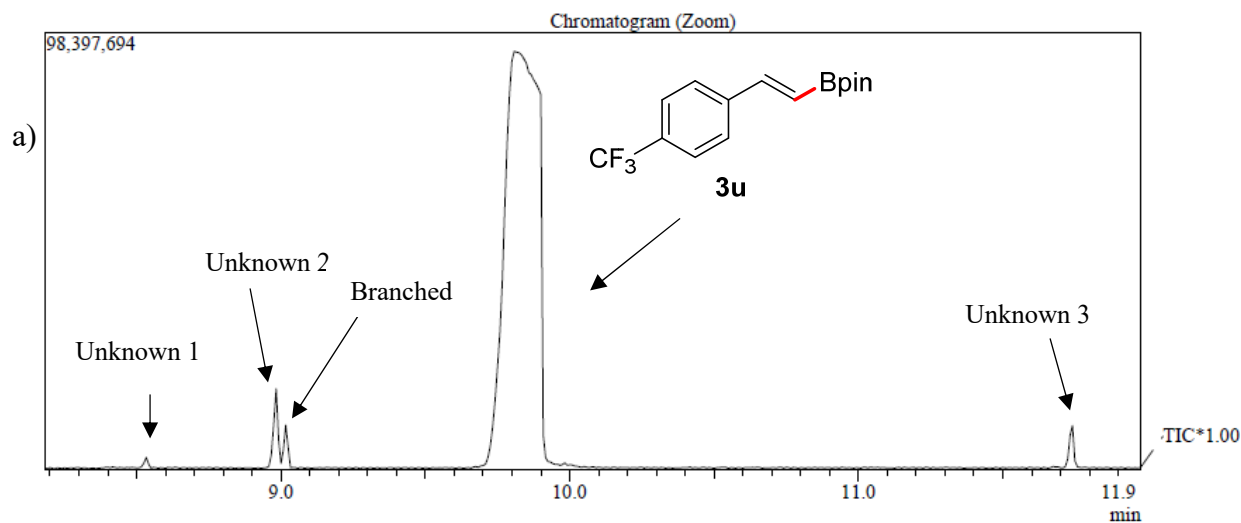

Line#:1 R.Time:9.842(Scan#:1181)  
 MassPeaks:503  
 RawMode:Single 9.842(1181) BasePeak:212.05(8265192)  
 BG Mode:None

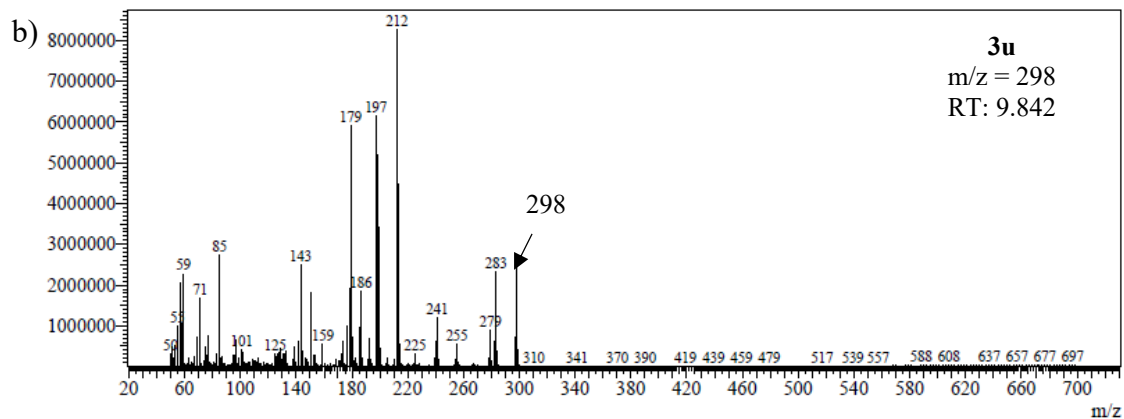

Line#:1 R.Time:8.525(Scan#:1023)  
 MassPeaks:356  
 RawMode:Single 8.525(1023) BasePeak:83.05(132738)  
 BG Mode:Averaged 8.092-8.475(971-1017)

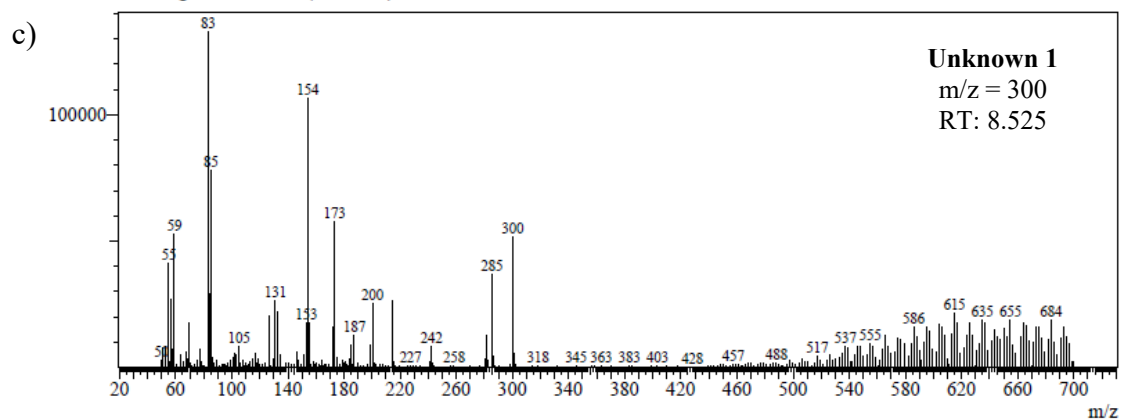

Line#:1 R.Time:8.983(Scan#:1078)  
 MassPeaks:364  
 RawMode:Single 8.983(1078) BasePeak:59.05(2205776)  
 BG Mode:Averaged 8.408-8.950(1009-1074)

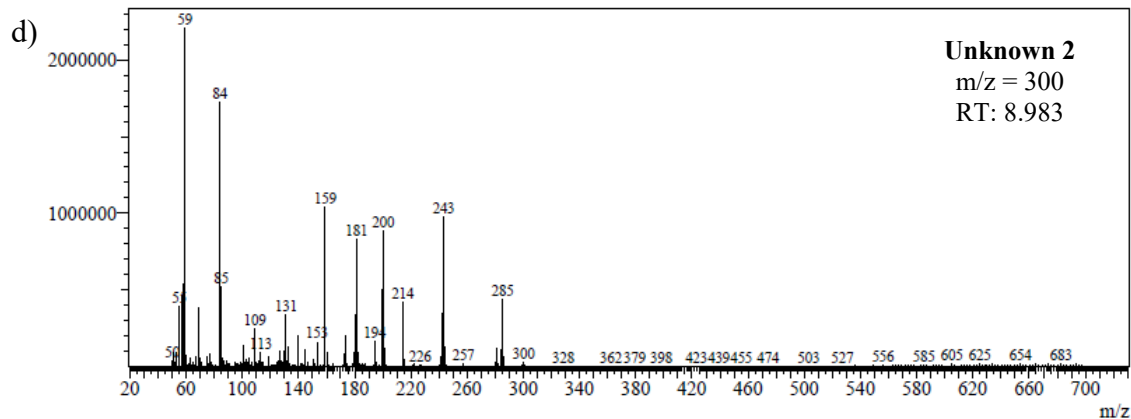

Line#:1 R.Time:9.017(Scan#:1082)  
 MassPeaks:399  
 RawMode:Single 9.017(1082) BasePeak:198.10(539154)  
 BG Mode:Averaged 8.200-8.950(984-1074)

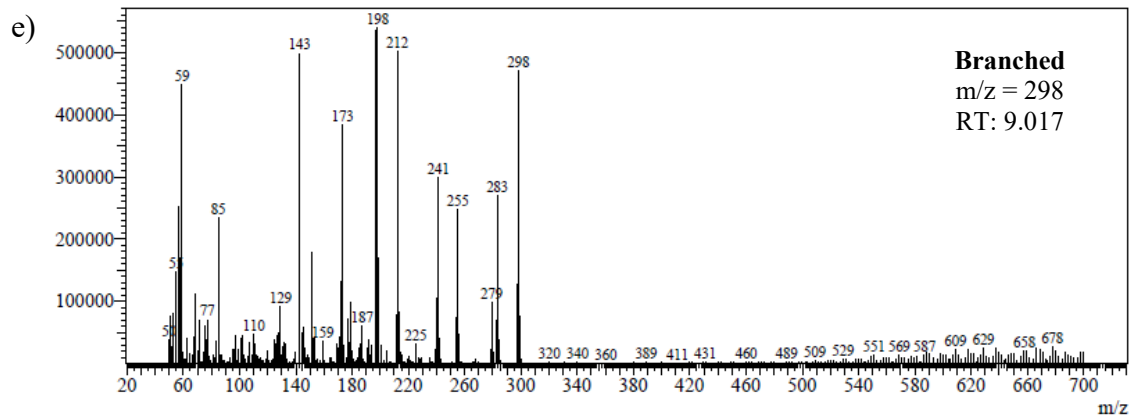

Line#:1 R.Time:11.742(Scan#:1409)  
 MassPeaks:404  
 RawMode:Single 11.742(1409) BasePeak:84.10(2707619)  
 BG Mode:Averaged 9.975-11.692(1197-1403)

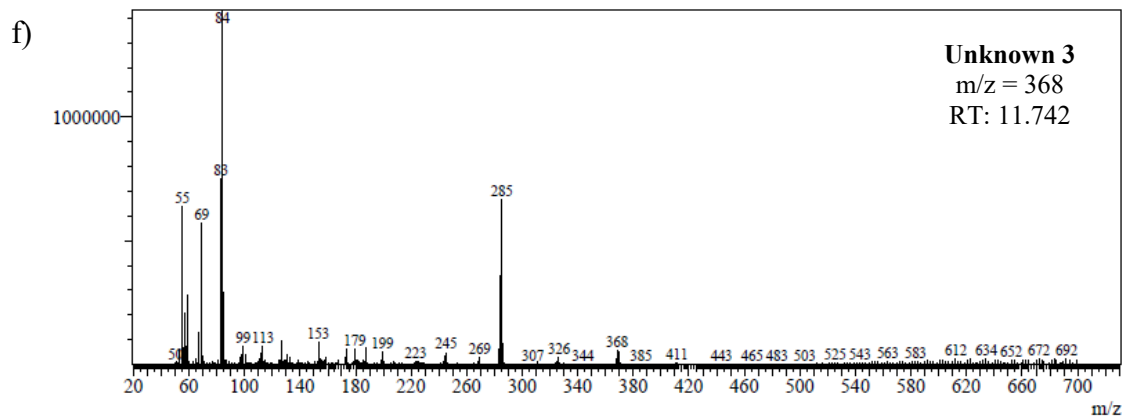

**Figure S30.** GC-MS chromatogram of product **3u**, branched isomer and 3 unknowns.

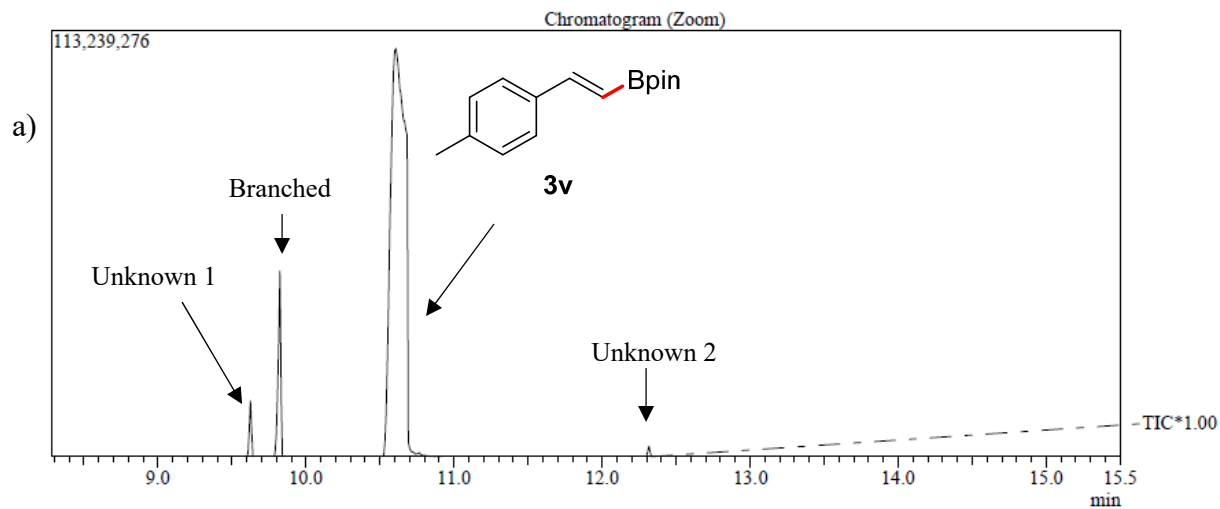

Line#1 R.Time:10.617(Scan#:1274)  
 MassPeaks:533  
 RawMode:Single 10.617(1274) BasePeak:143.05(12758577)  
 BG Mode:None

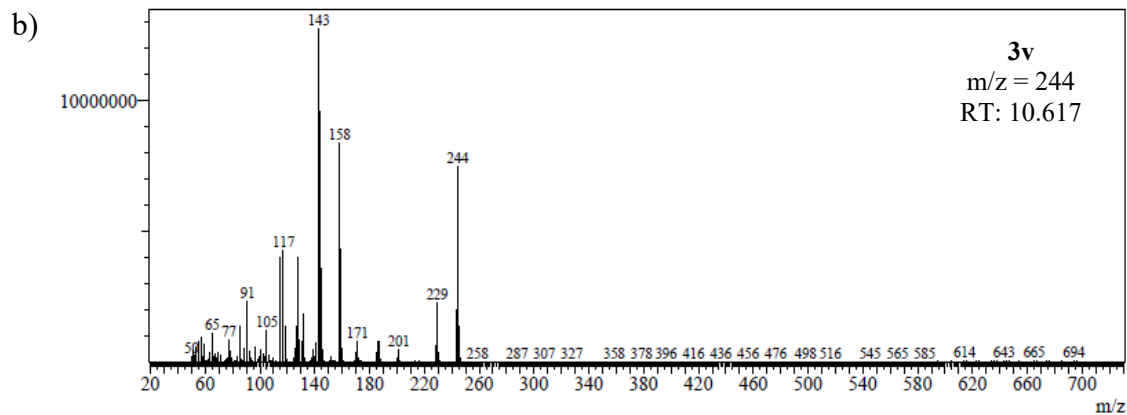

Line#1 R.Time:9.617(Scan#:1154)  
 MassPeaks:366  
 RawMode:Single 9.617(1154) BasePeak:84.05(1399237)  
 BG Mode:Averaged 8.450-9.575(1014-1149)

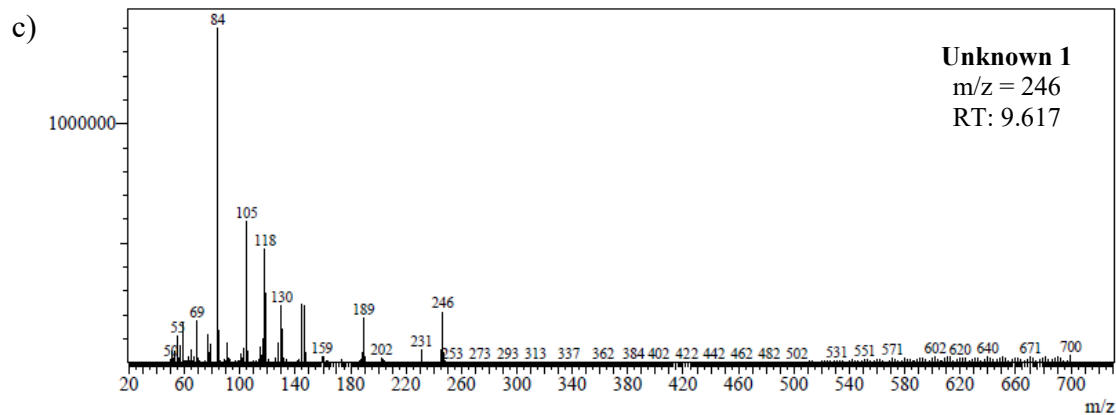

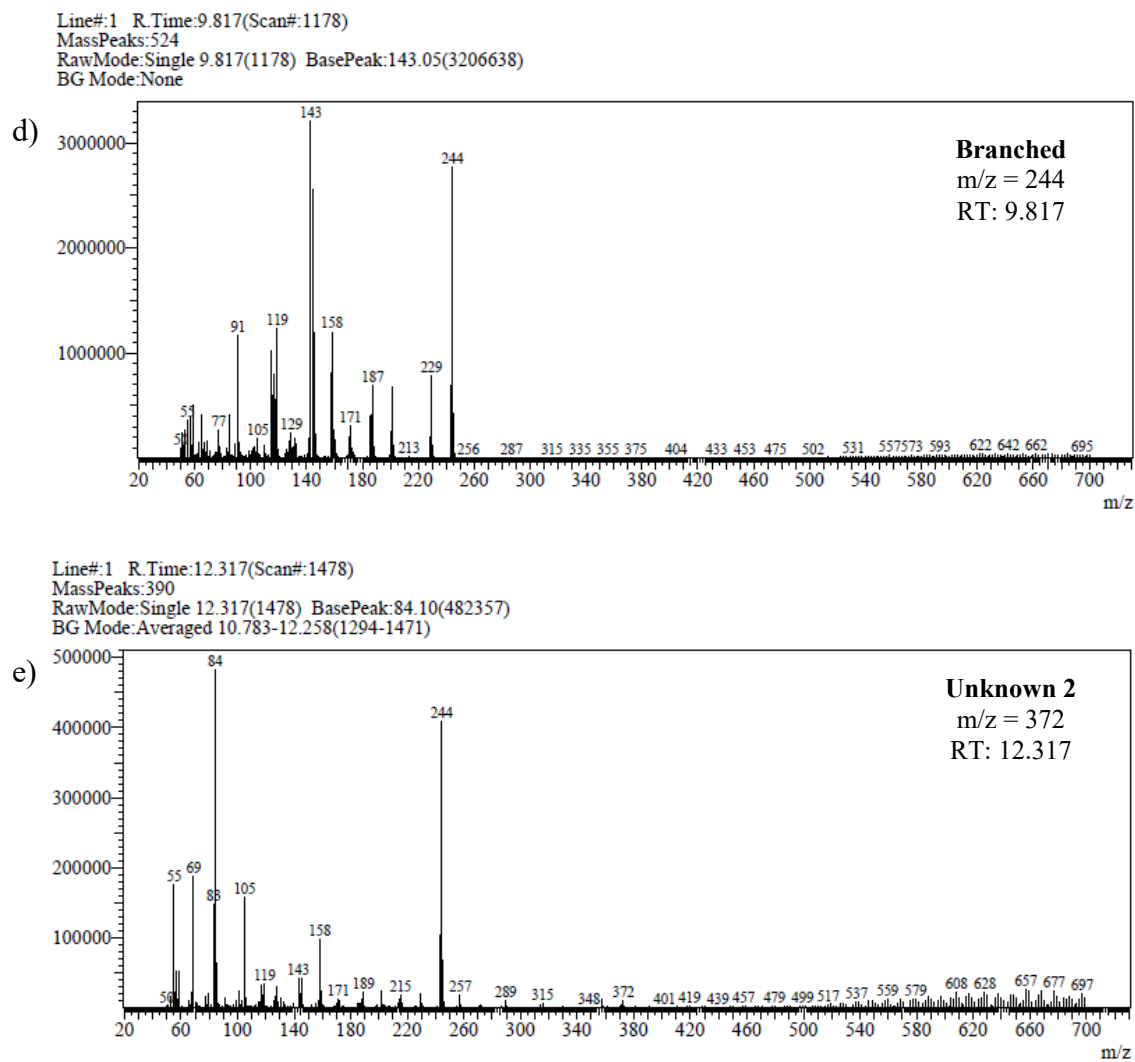

**Figure S31.** GC-MS chromatograms of product **3v**, branched isomer, and 2 unknowns.



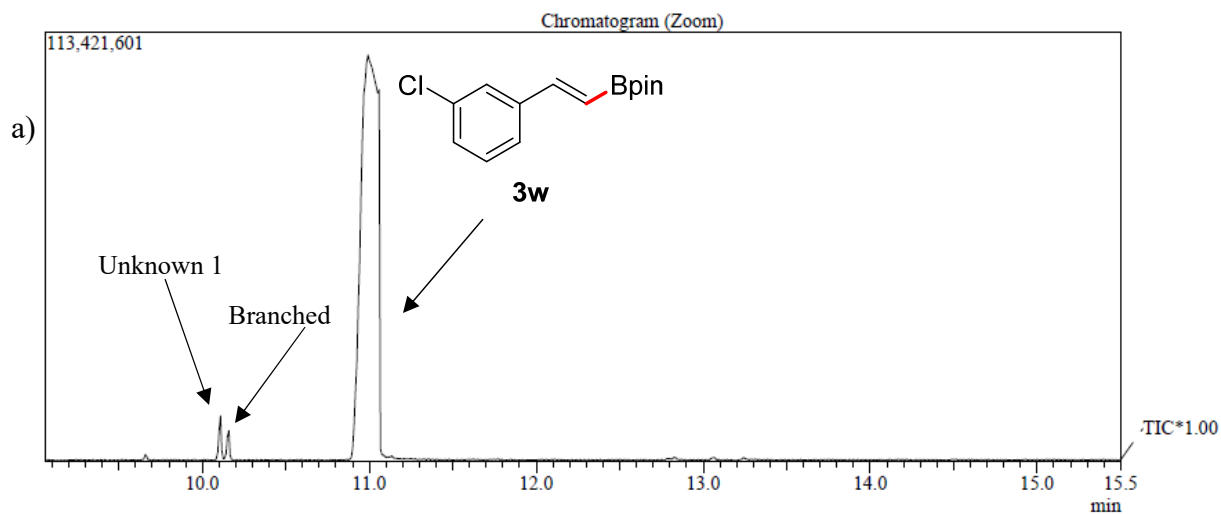

Line#1 R.Time:10.983(Scan#:1318)  
 MassPeaks:485  
 RawMode:Single 10.983(1318) BasePeak:164.10(6819146)  
 BG Mode:None

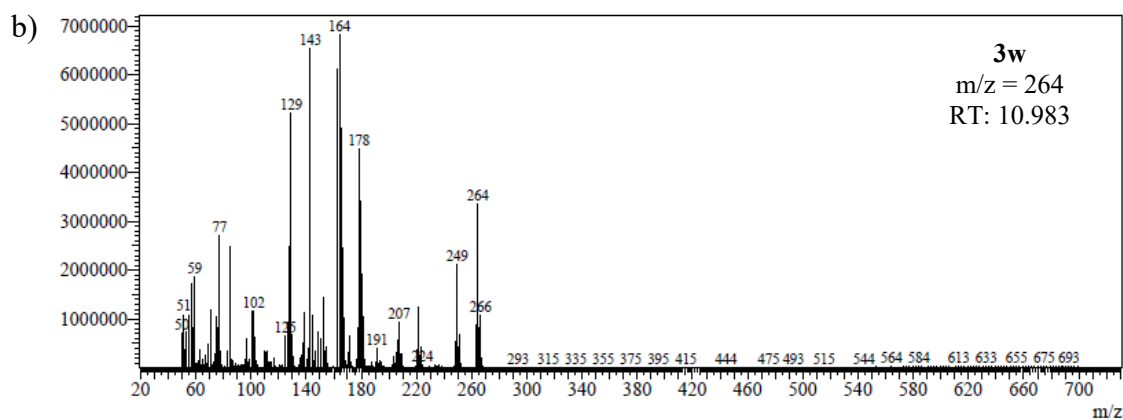

Line#1 R.Time:10.100(Scan#:1212)  
 MassPeaks:378  
 RawMode:Single 10.100(1212) BasePeak:84.05(1006613)  
 BG Mode:Averaged 9.208-10.058(1105-1207)

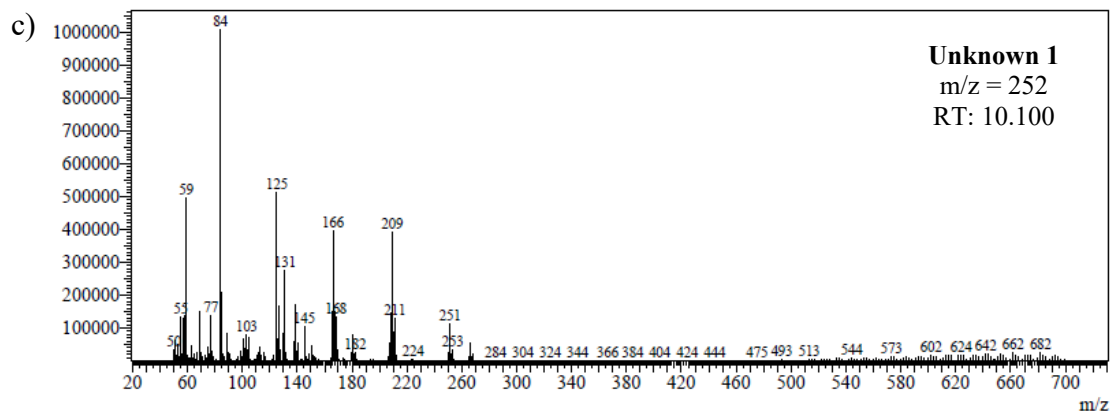

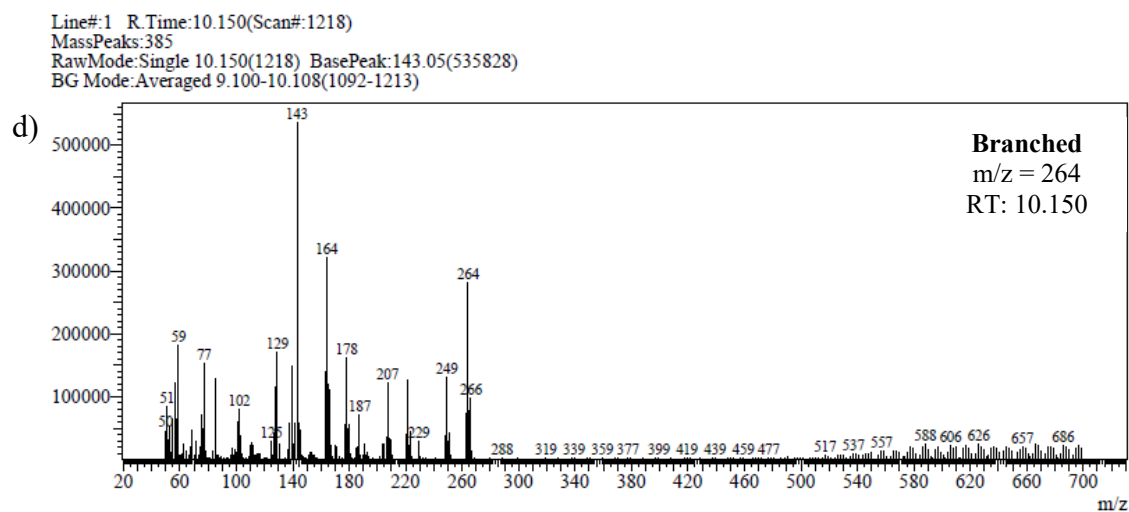

**Figure S32.** GC-MS chromatogram of product **3w**, branched isomer, and an unknown.

## 9. NMR data

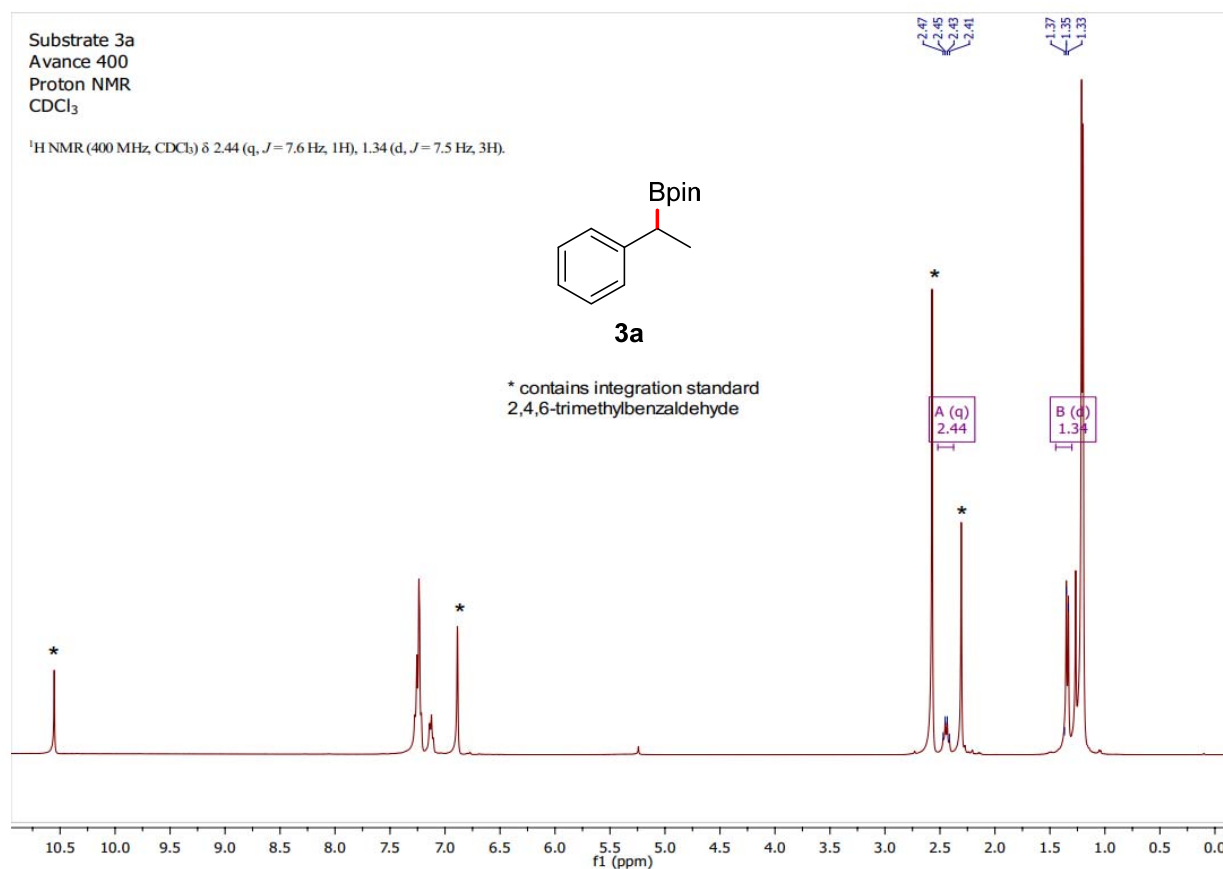

**Figure S33.** NMR spectra of product **3a**.

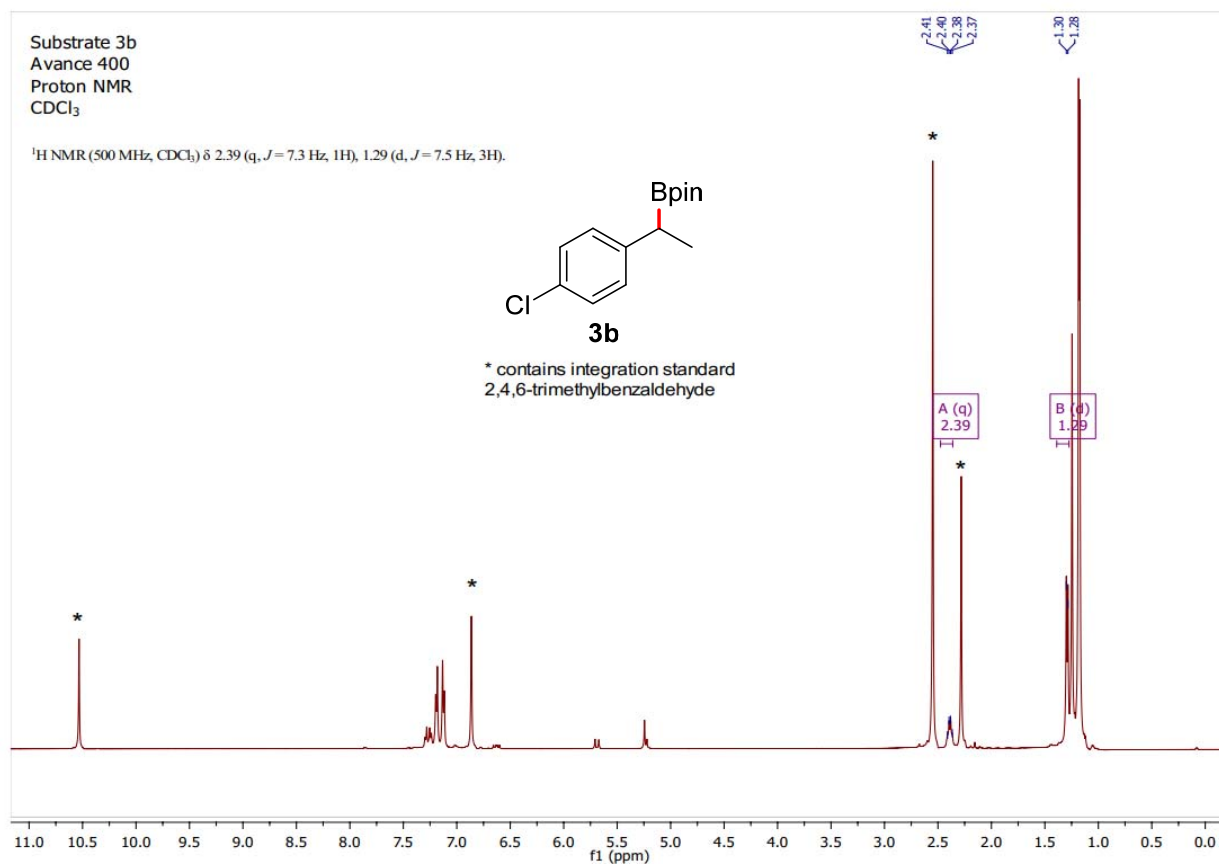

**Figure S34.** NMR spectra of product **3b**.

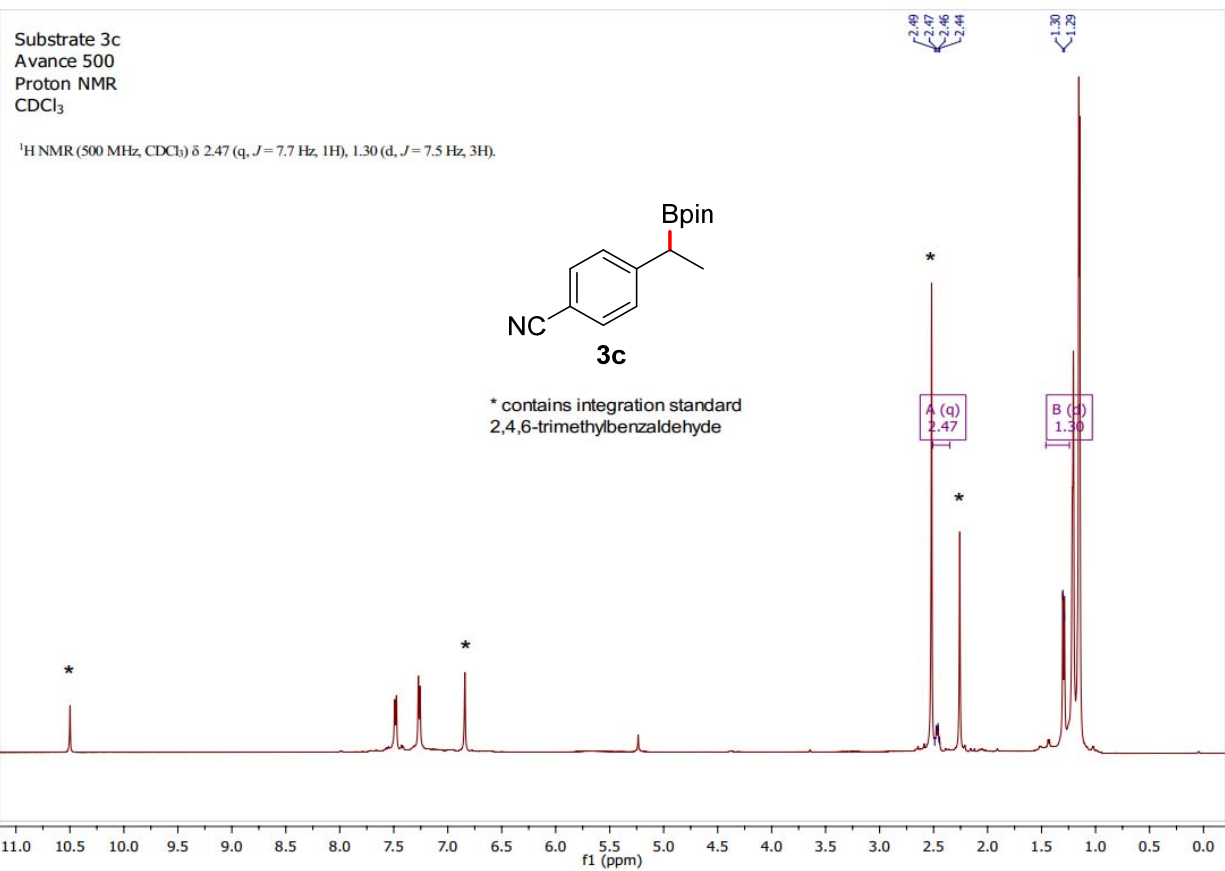

**Figure S35.** NMR spectra of product **3c**.

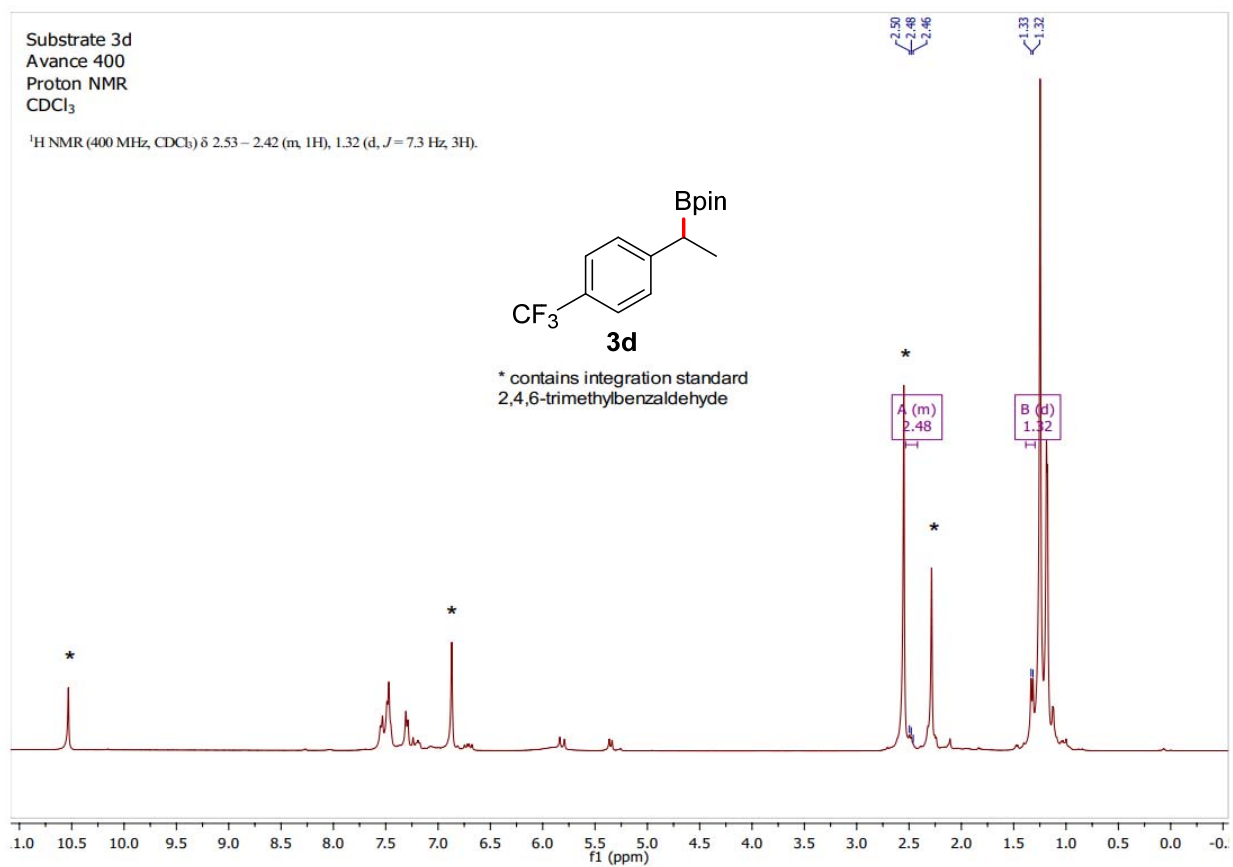

**Figure S36.** NMR spectra of product **3d**.

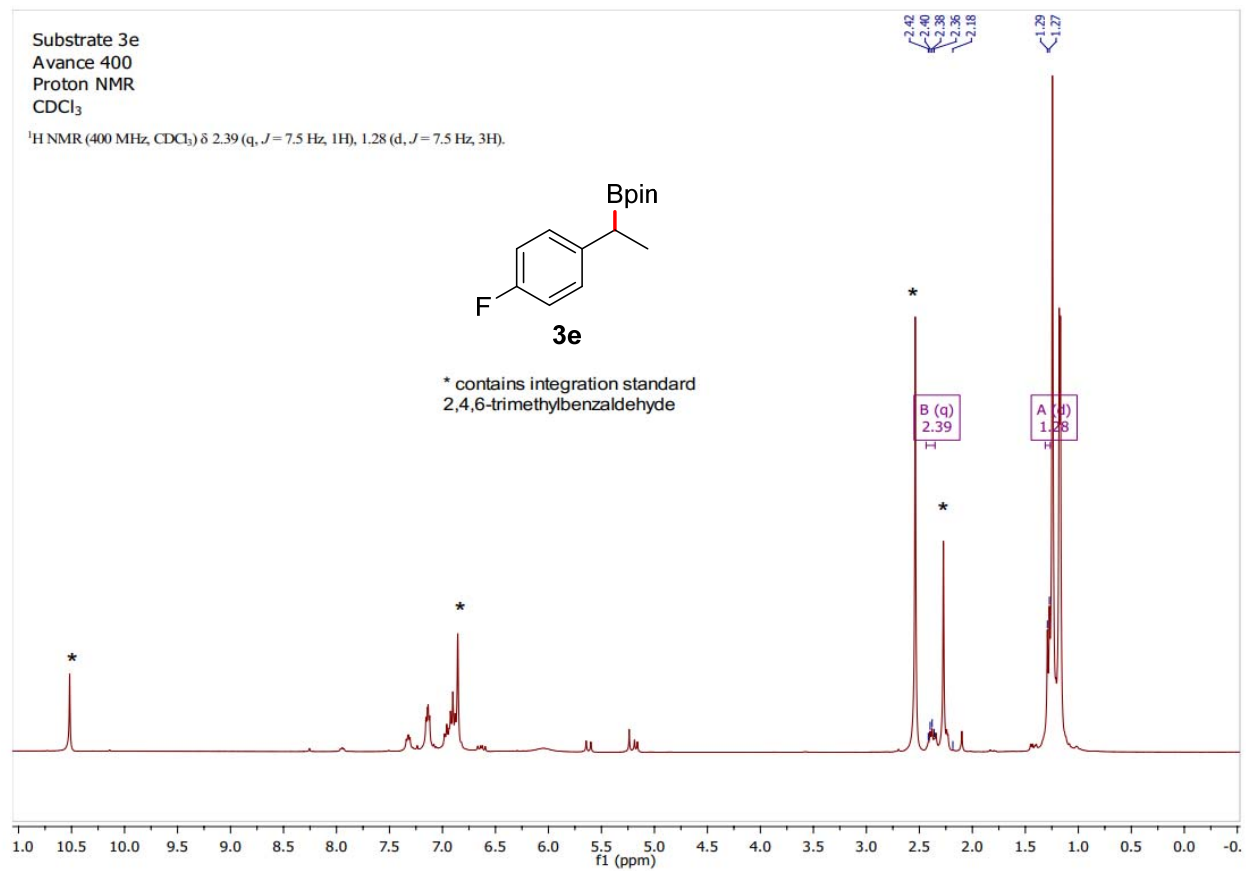

**Figure S37.** NMR spectra of product **3e**.

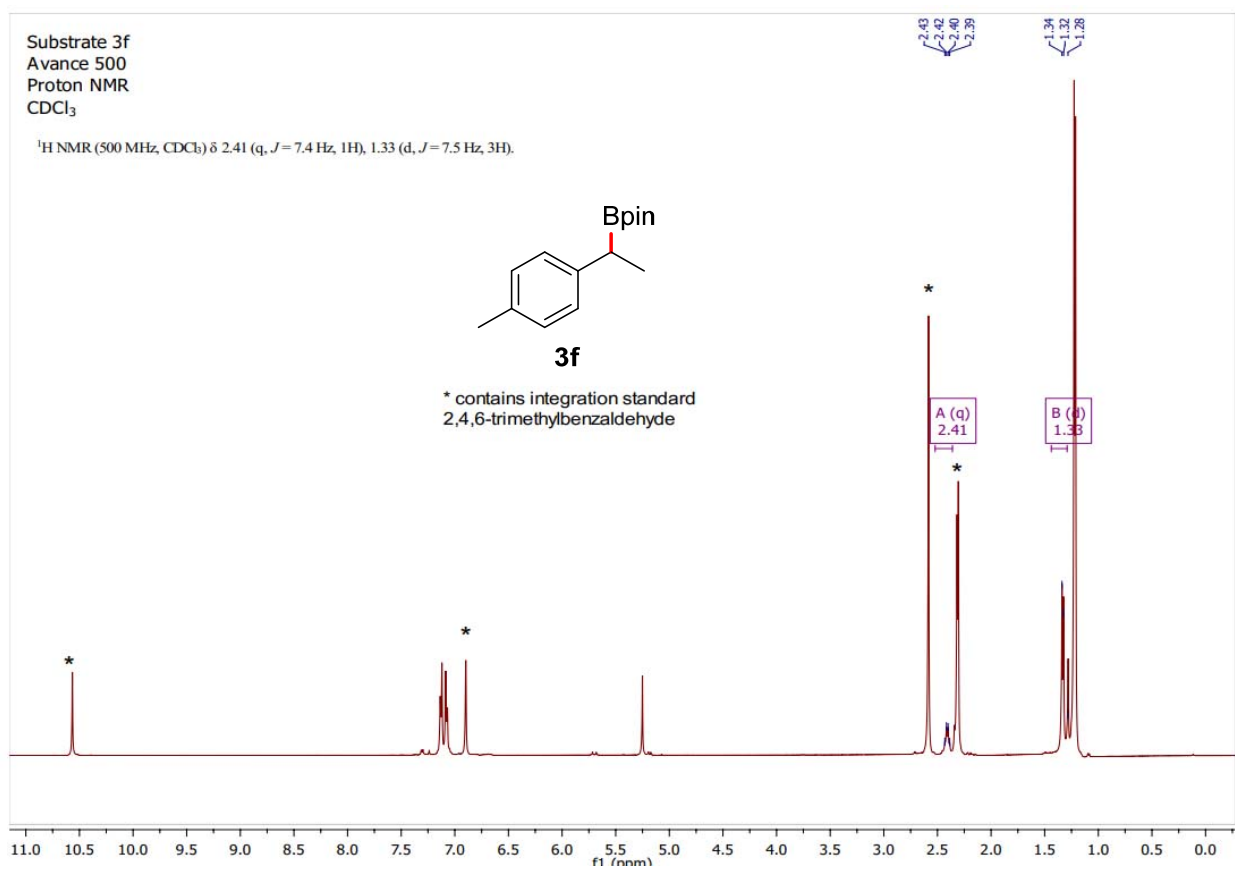

**Figure S38.** NMR spectra of product **3f**.

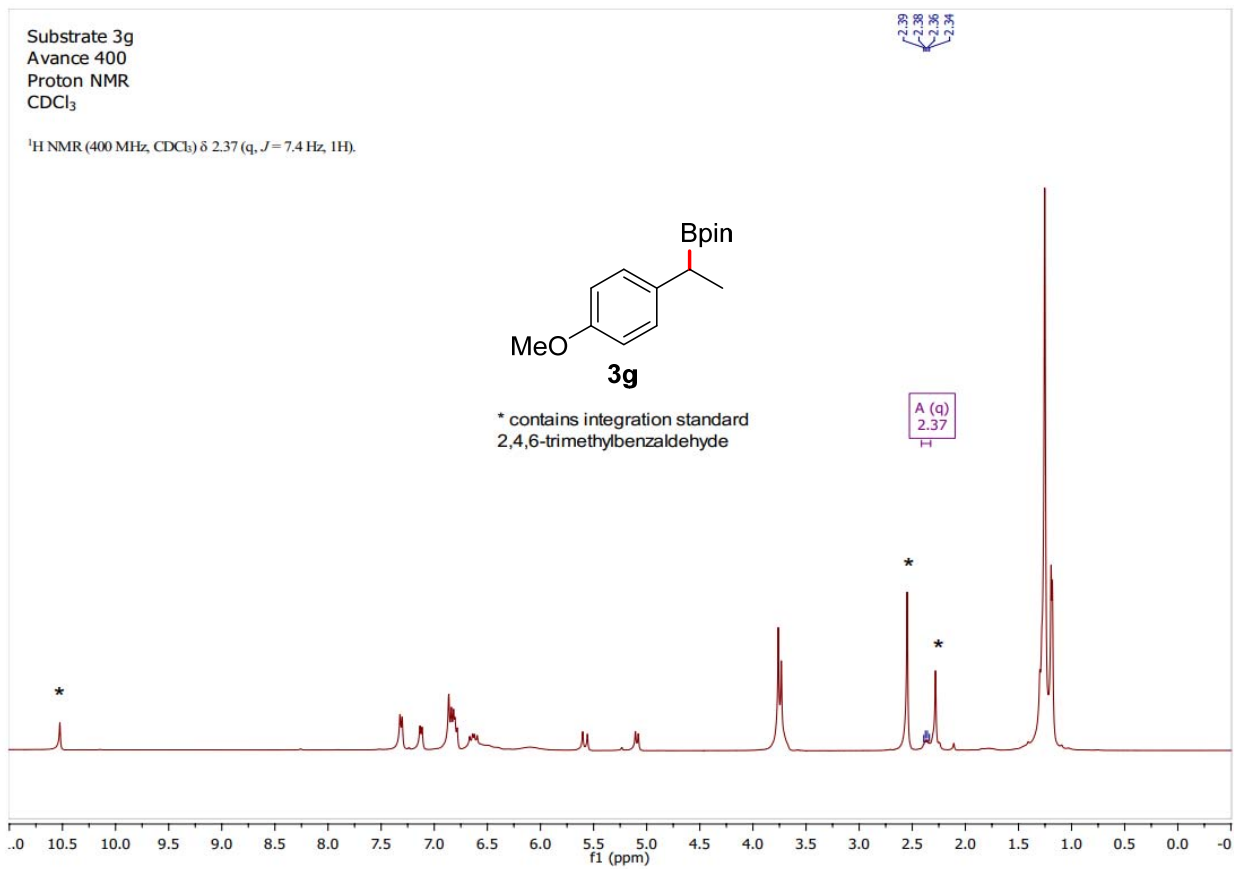

**Figure S39.** NMR spectra of product **3g**.



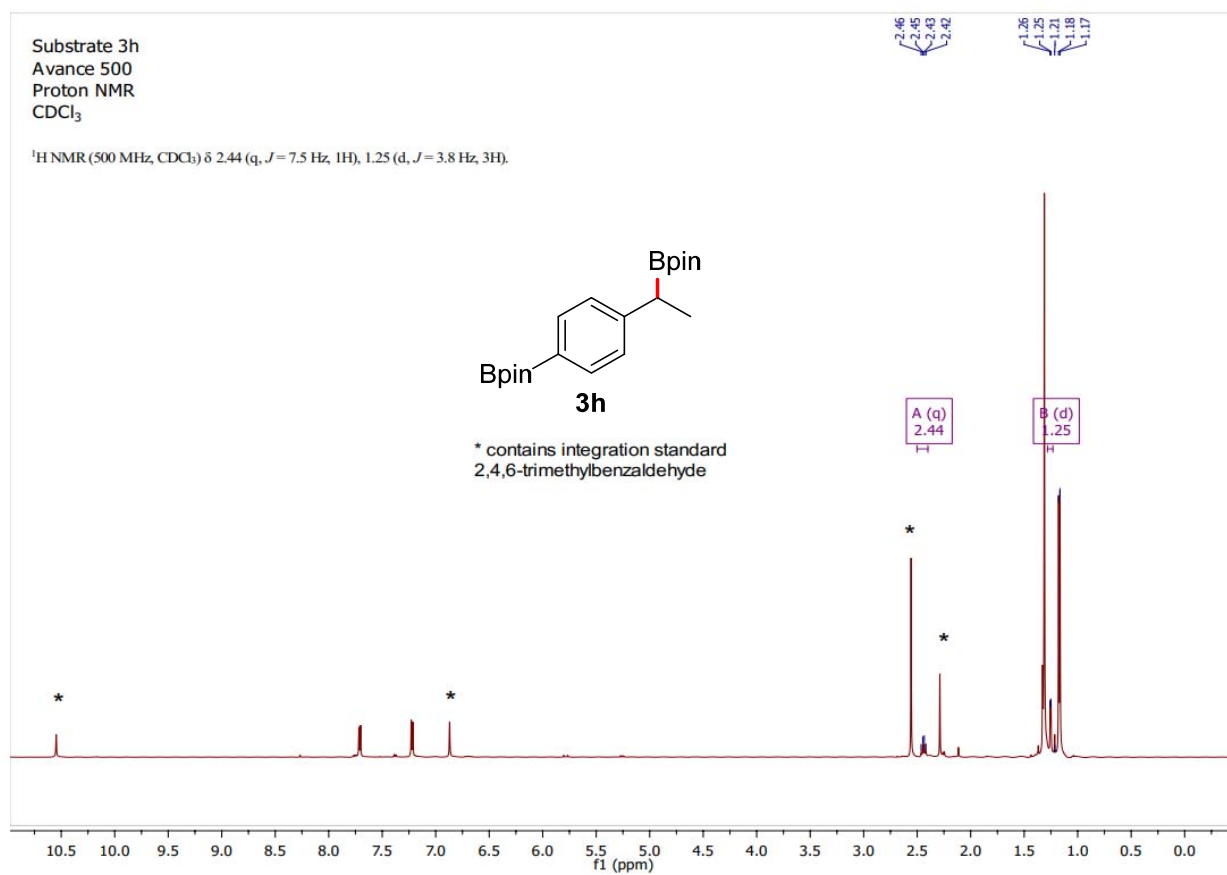

**Figure S40.** NMR spectra of product **3h**.

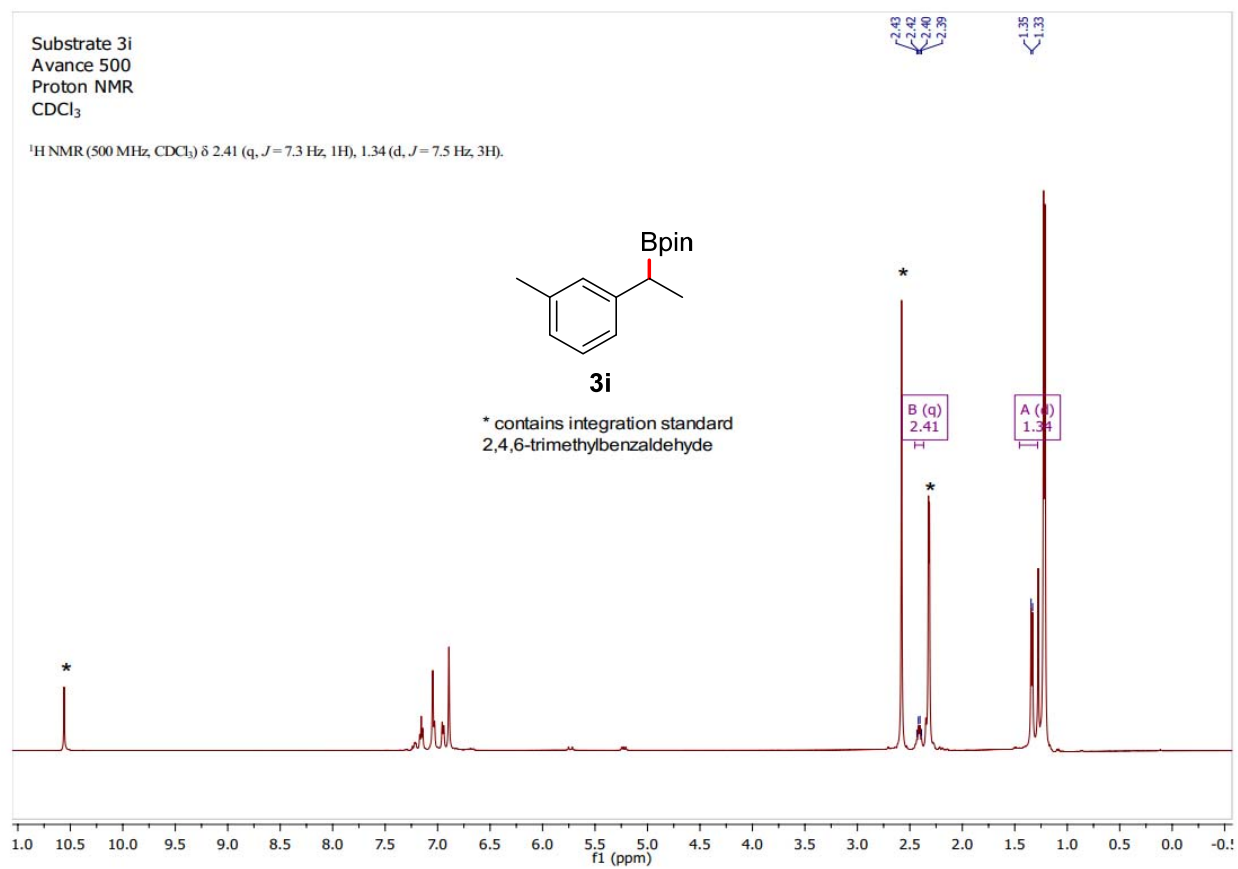

**Figure S41.** NMR spectra of product **3i**.

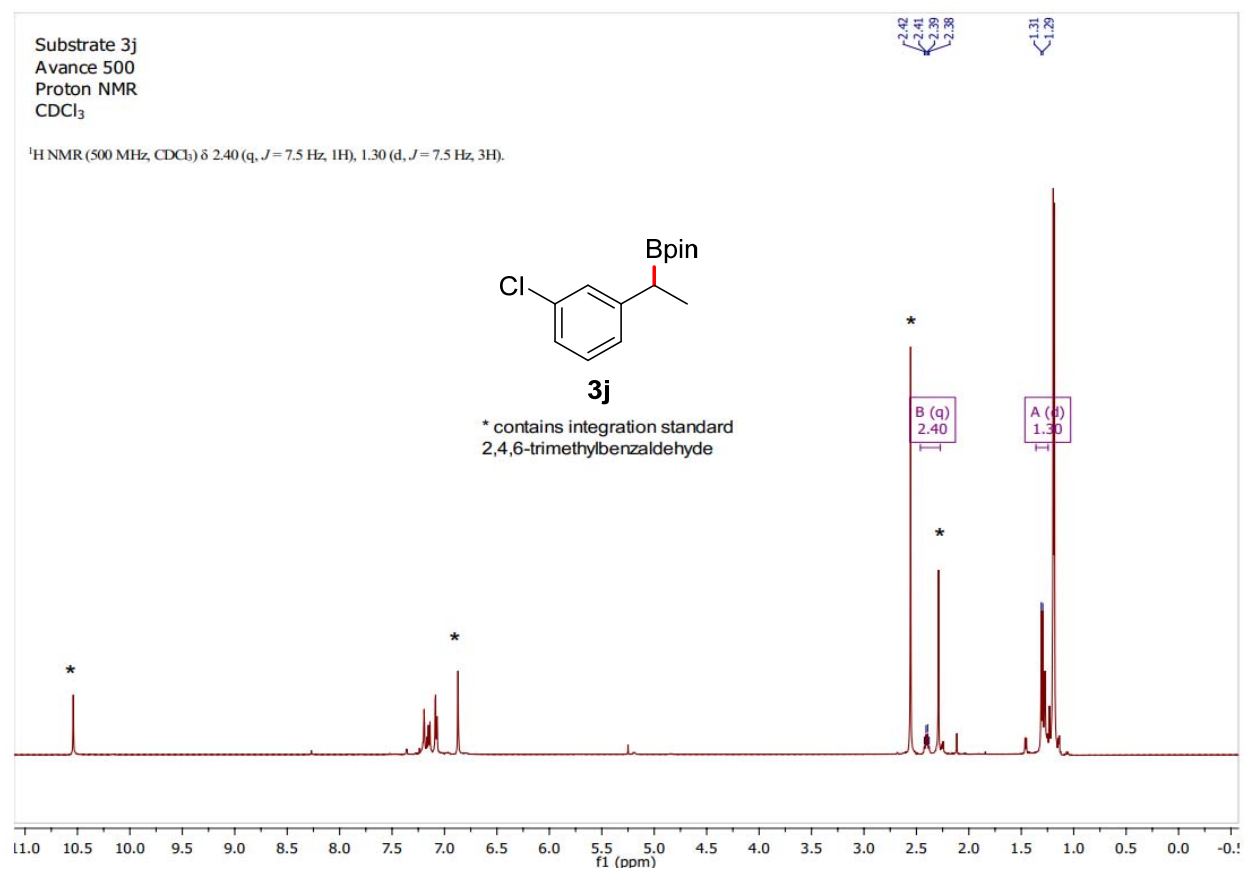

**Figure S42.** NMR spectra of product **3j**.

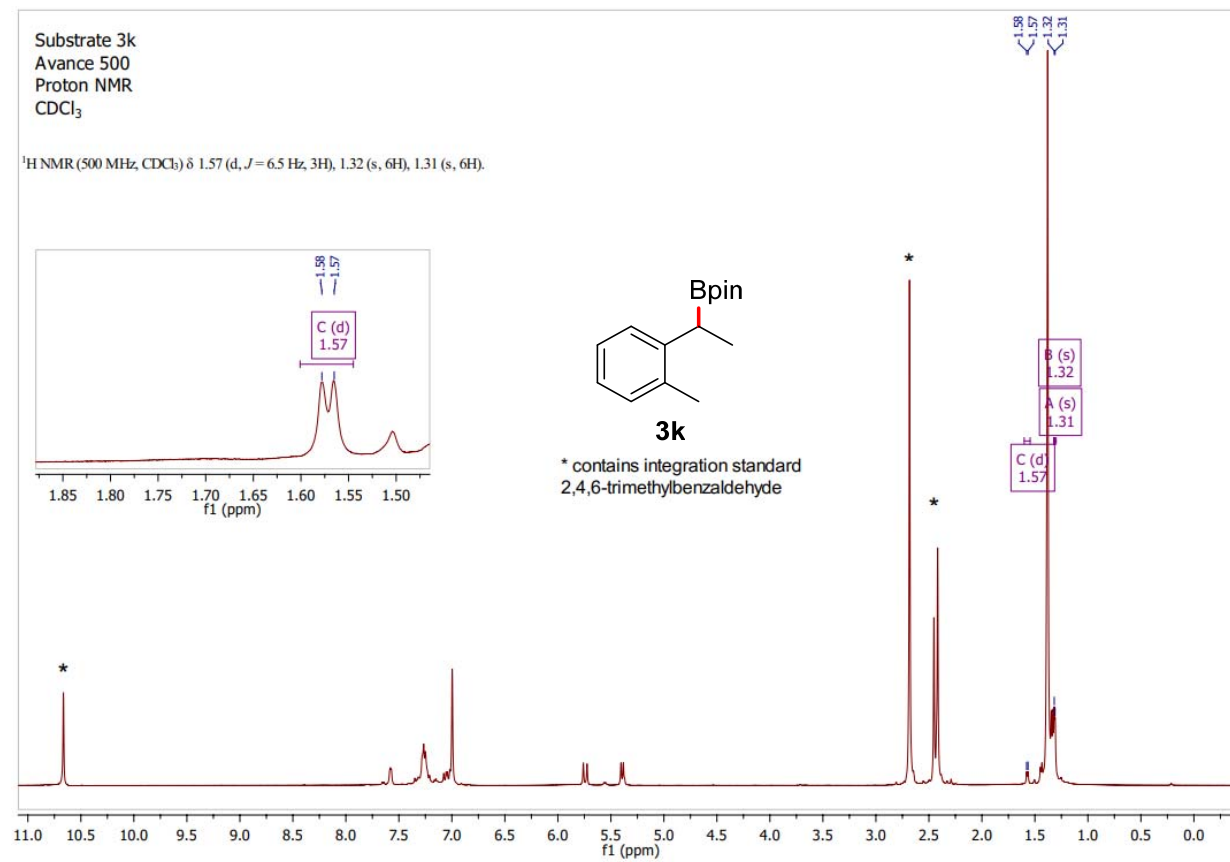

**Figure S43.** NMR spectra of product **3k**.

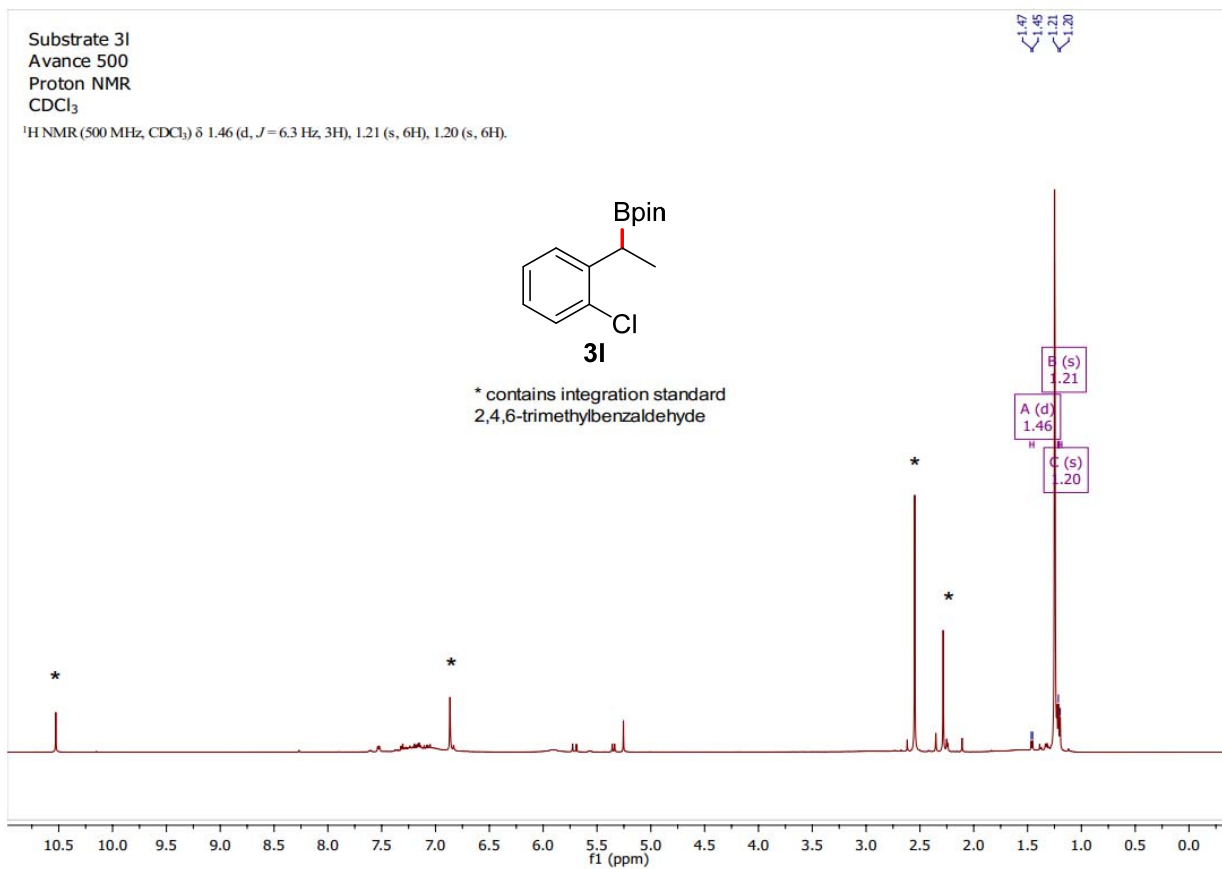

**Figure S44.** NMR spectra of product **3l**.

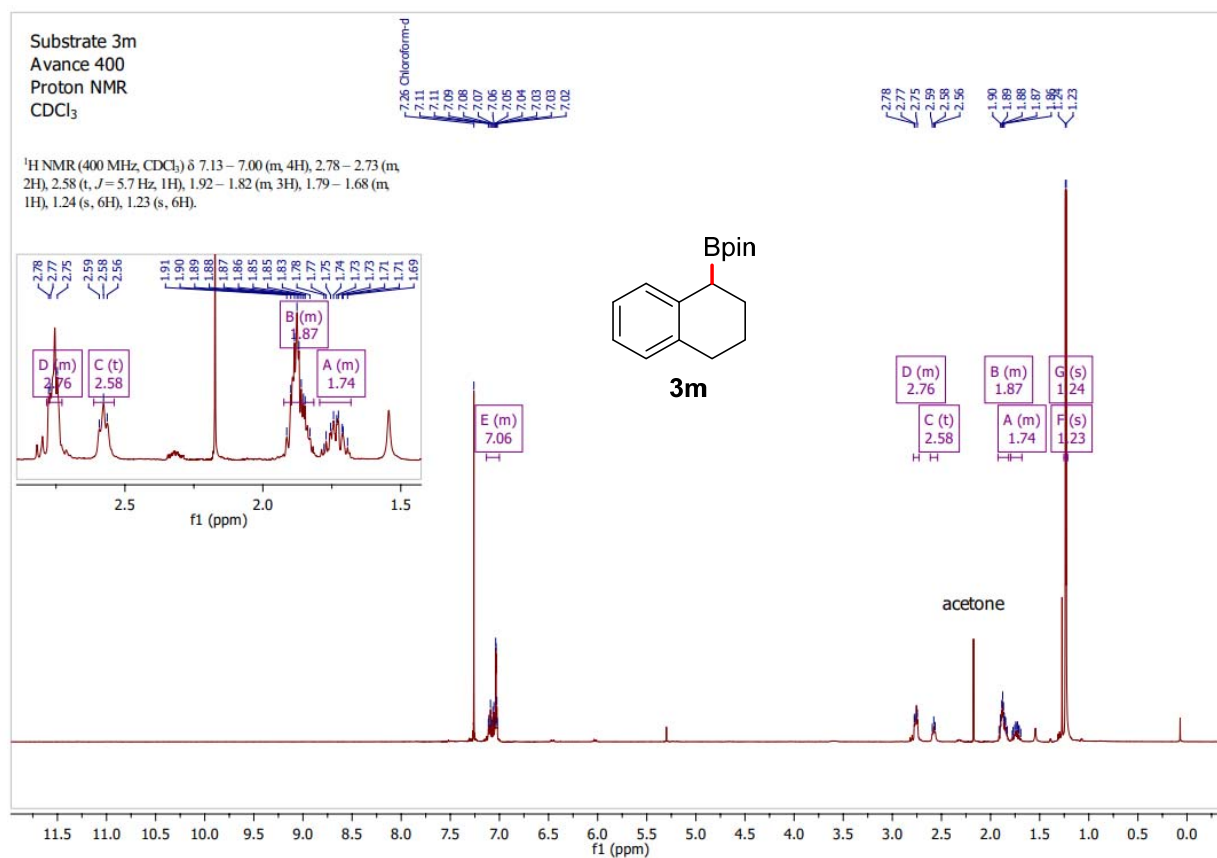

**Figure S45.** NMR spectra of product **3m**.

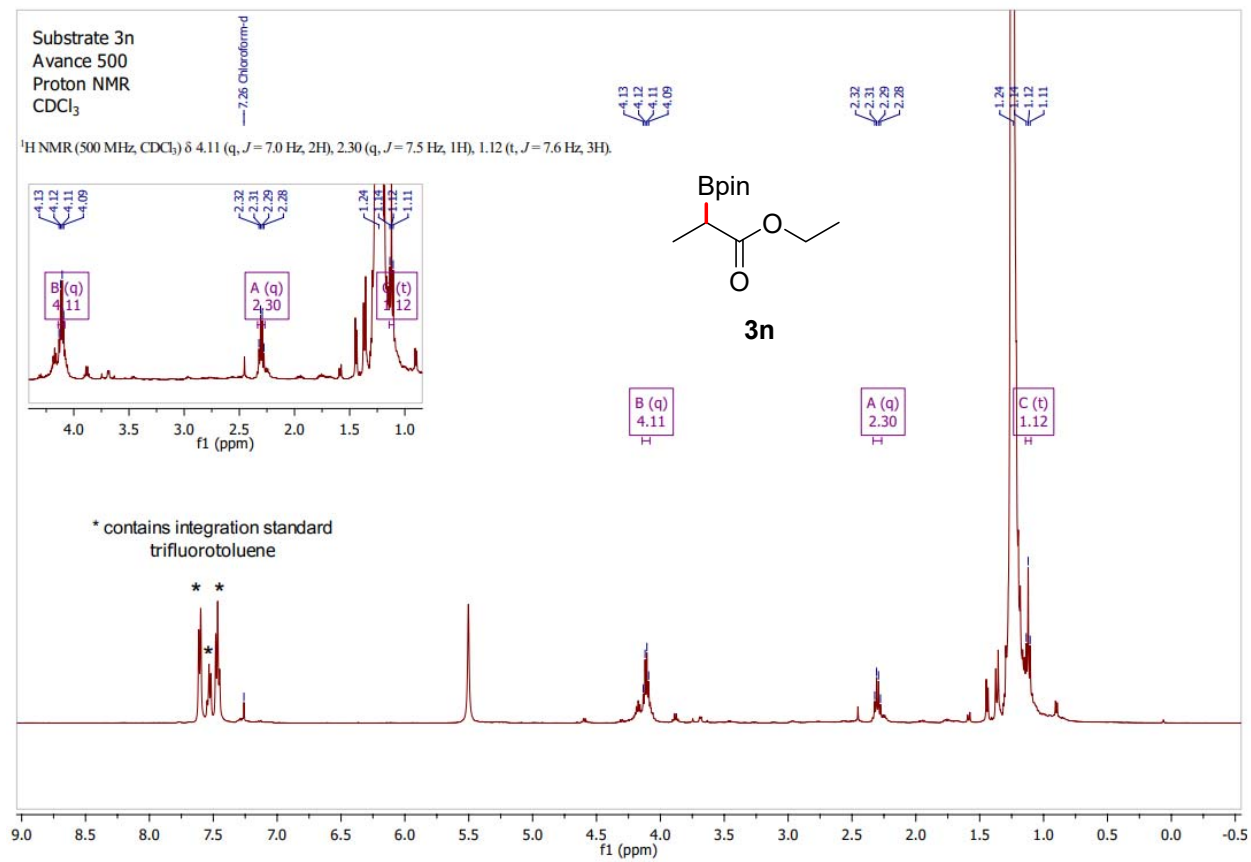

**Figure S46.** NMR spectra of product **3n**.

Substrate 3p  
 Avance 400  
 Proton NMR  
 CDCl<sub>3</sub>

<sup>1</sup>H NMR (400 MHz, CDCl<sub>3</sub>) δ 7.47 (d, *J* = 7.0 Hz, 2H), 7.38 (d, *J* = 18.5 Hz, 1H), 7.34 – 7.20 (m, 3H), 6.15 (d, *J* = 18.4 Hz, 1H).

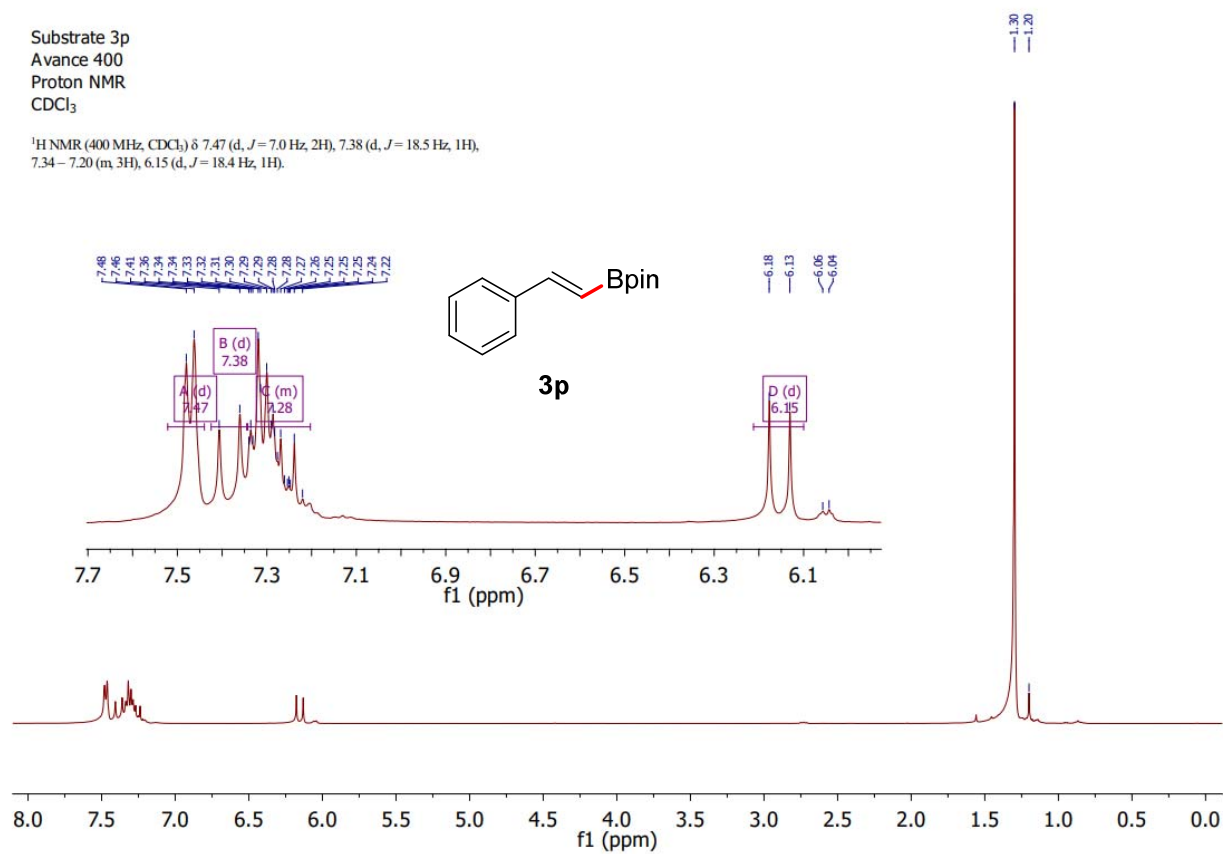

**Figure S47.** NMR spectra of product 3p.



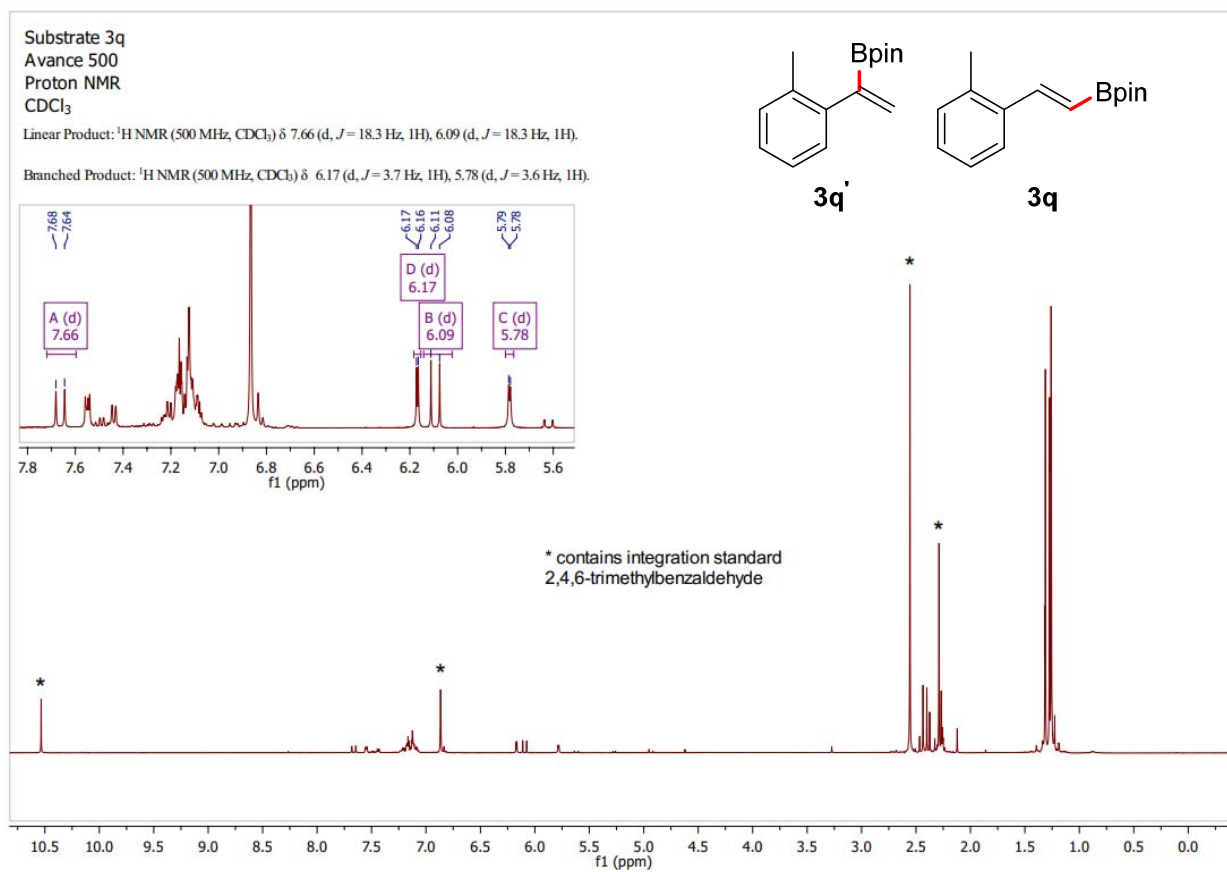

**Figure S48.** NMR spectra of product **3q**.

Substrate 3r  
 Avance 400  
 Proton NMR  
 CDCl<sub>3</sub>

<sup>1</sup>H NMR (400 MHz, CDCl<sub>3</sub>) δ 8.57 (s, 1H), 8.39 (d, *J* = 4.4 Hz, 1H), 7.67 (d, *J* = 7.7 Hz, 1H), 7.26 (d, *J* = 18.4 Hz, 1H), 7.14 (dd, *J* = 7.6, 4.9 Hz, 1H), 6.14 (d, *J* = 18.5 Hz, 1H), 1.20 (s, 12H).

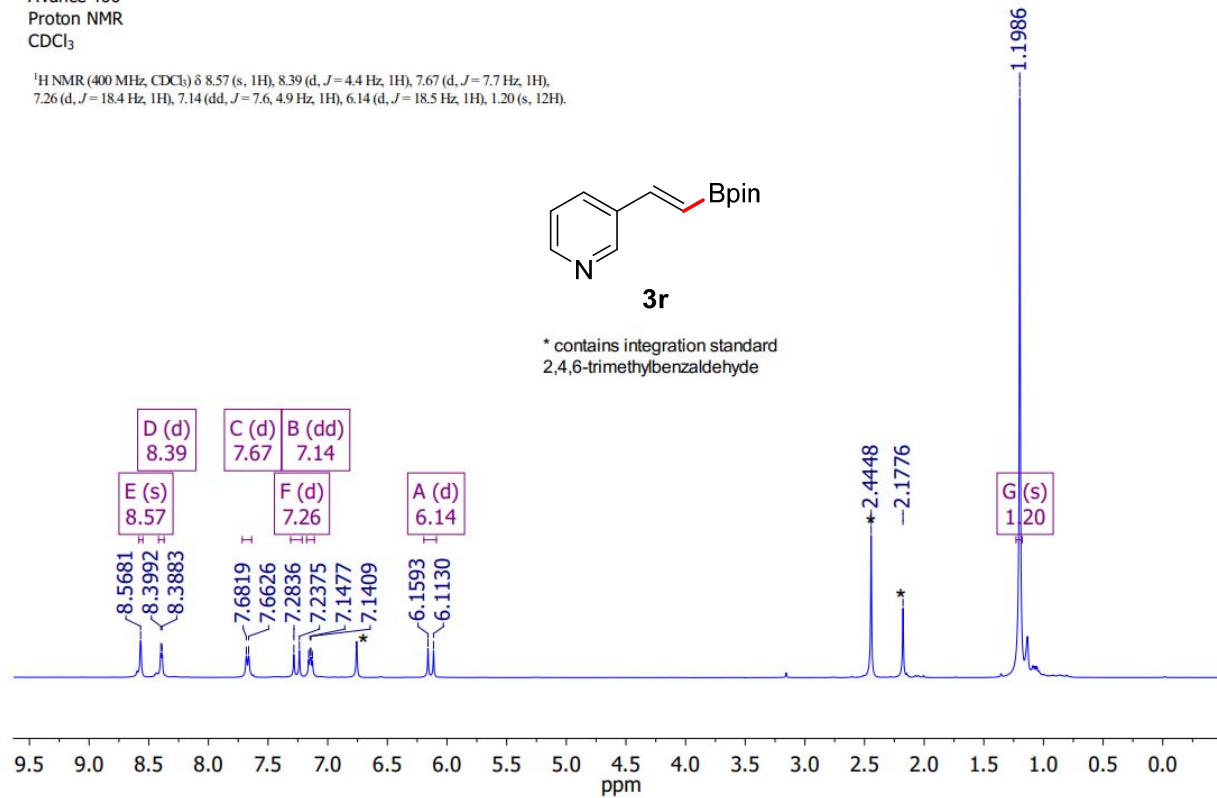

**Figure S49.** NMR spectra of product 3r.



Substrate 3t  
Avance 400  
Proton NMR  
CDCl<sub>3</sub>

<sup>1</sup>H NMR (400 MHz, CDCl<sub>3</sub>) δ 7.38 (d, *J* = 18.4 Hz, 1H), 6.24 (d, *J* = 18.4 Hz, 1H).

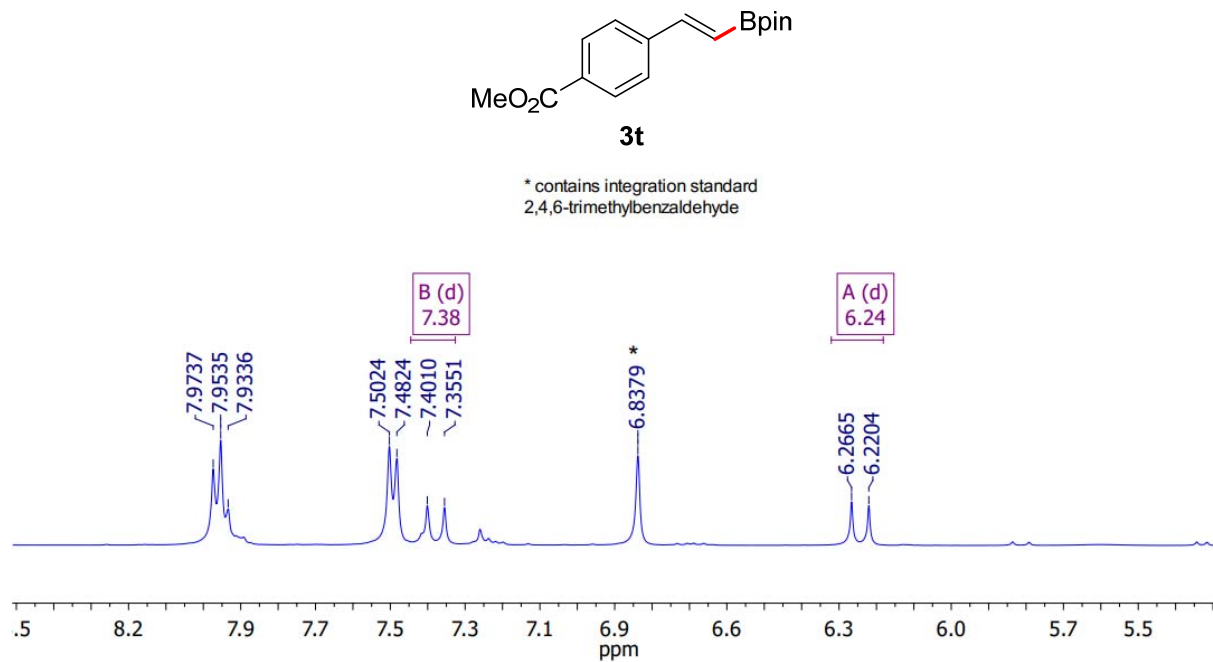

**Figure S51.** NMR spectra of product **3t**.

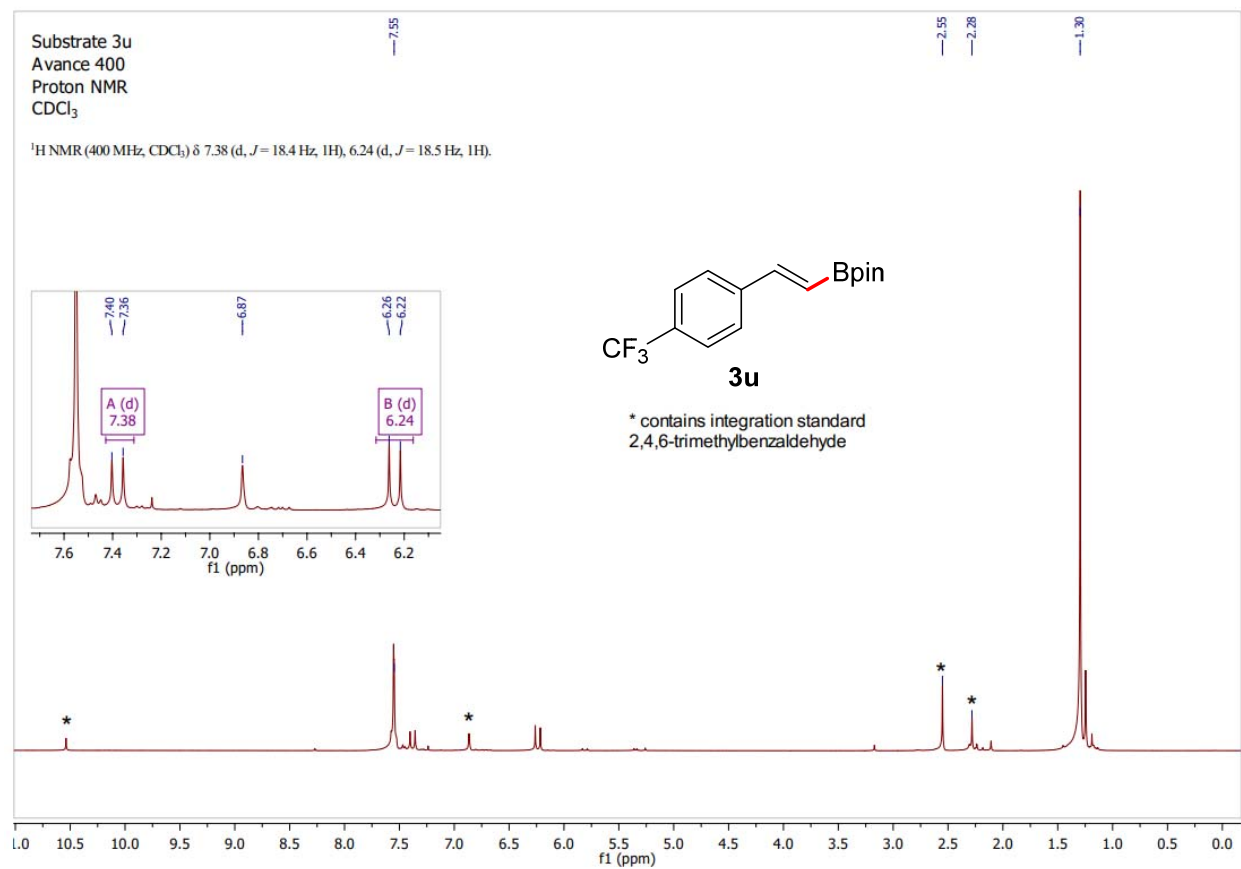

**Figure S52.** NMR spectra of product **3u**.





## 9. References

- (1) Jafarpour, L.; Stevens, E. D.; Nolan, S. P. A Sterically Demanding Nucleophilic Carbene: 1,3-Bis(2,6-Diisopropylphenyl)Imidazol-2-Ylidene). Thermochemistry and Catalytic Application in Olefin Metathesis. *J. Organomet. Chem.* **2000**, *606*, 49–54.
- (2) Bantreil, X.; Nolan, S. P. Synthesis of N-Heterocyclic Carbene Ligands and Derived Ruthenium Olefin Metathesis Catalysts. *Nat. Protoc.* **2011**, *6*, 69–77.
- (3) MacNair, A. J.; Millet, C. R. P.; Nichol, G. S.; Ironmonger, A.; Thomas, S. P. Markovnikov-Selective, Activator-Free Iron-Catalyzed Vinylarene Hydroboration. *ACS Catal.* **2016**, *6*, 7217–7221.
- (4) Zhang, G.; Wu, J.; Li, S.; Cass, S.; Zheng, S. Markovnikov-Selective Hydroboration of Vinylarenes Catalyzed by a Cobalt(II) Coordination Polymer. *Org. Lett.* **2018**, *20*, 7893–7897.
- (5) Peng, J.; Docherty, J. H.; Dominey, A. P.; Thomas, S. P. Cobalt-Catalysed Markovnikov Selective Hydroboration of Vinylarenes. *Chem. Commun.* **2017**, *53*, 4726–4729.
- (6) Do, N. M.; Olivier, M. A.; Salisbury, J. J.; Wager, C. B. Application of Quantitative <sup>19</sup>F and <sup>1</sup>H NMR for Reaction Monitoring and In Situ Yield Determinations for an Early Stage Pharmaceutical Candidate. *Anal. Chem.* **2011**, *83*, 8766–8771.
- (7) Lennox, A. J. J.; Nutting, J. E.; Stahl, S. S. Selective Electrochemical Generation of Benzylic Radicals Enabled by Ferrocene-Based Electron-Transfer Mediators. *Chem. Sci.* **2018**, *9*, 356–361.
- (8) Li, H.; Wang, L.; Zhang, Y.; Wang, J. Transition-Metal-Free Synthesis of Pinacol Alkylboronates from Tosylhydrazones. *Angew. Chemie Int. Ed.* **2012**, *51*, 2943–2946.
- (9) Huang, J.; Yan, W.; Tan, C.; Wu, W.; Jiang, H. Palladium-Catalyzed Regioselective Hydroboration of Aryl Alkenes with B<sub>2</sub>Pin<sub>2</sub>. *Chem. Commun.* **2018**, *54*, 1770–1773.
- (10) Hu, J.; Sun, H.; Cai, W.; Pu, X.; Zhang, Y.; Shi, Z. Nickel-Catalyzed Borylation of Aryl- and Benzyltrimethylammonium Salts via C–N Bond Cleavage. *J. Org. Chem.* **2016**, *81*, 14–24.
- (11) Ng, E. W. H.; Low, K.-H.; Chiu, P. Synthesis and Applications of Unquaternized C-Bound Boron Enolates. *J. Am. Chem. Soc.* **2018**, *140*, 3537–3541.
- (12) Zhang, P.; Mejjide Suárez, J.; Driant, T.; Derat, E.; Zhang, Y.; Ménand, M.; Roland, S.; Sollogoub, M. Cyclodextrin Cavity-Induced Mechanistic Switch in Copper-Catalyzed Hydroboration. *Angew. Chemie Int. Ed.* **2017**, *56*, 10821–10825.
- (13) Romero, E. A.; Jazzar, R.; Bertrand, G. (CAAC)CuX-Catalyzed Hydroboration of Terminal Alkynes with Pinacolborane Directed by the X-Ligand. *J. Organomet. Chem.* **2017**, *829*, 11–13.
- (14) Hoyt, C. B.; Sarazen, M. L.; Jones, C. W. Hydroboration of Substituted Alkynes Using a Solid Polymeric Carboxylic Acid Catalyst. *J. Catal.* **2019**, *369*, 493–500.
- (15) Hawkeswood, S.; Stephan, D. W. Syntheses and Reactions of the Bis-Boryloxide O(Bpin)<sub>2</sub>(Pin = O<sub>2</sub>C<sub>2</sub>Me<sub>4</sub>). *Dalt. Trans.* **2005**, 2182–2187.
